# Supplementary material
Source: PubMed Central journal article supplement (PMC2556959)

## SUPPORTING INFORMATION

### Synthesis of 3-Iodoindoles by the Pd/Cu-Catalyzed Coupling of *N,N*-Dialkyl-2-iodoanilines and Terminal Acetylenes, Followed by Electrophilic Cyclization

Dawei Yue, Tuanli Yao and Richard C. Larock\*

*Department of Chemistry, Iowa State University, Ames, IA 50011*

|                                                              | <b>Page</b> |
|--------------------------------------------------------------|-------------|
| General                                                      | S2-S2       |
| Preparation of 2-iodoanilines                                | S2-S5       |
| Preparation of the <i>N,N</i> -dialkyl-2-(1-alkynyl)anilines | S5-S12      |
| Iodocyclization of <i>N,N</i> -dialkyl-2-(1-alkynyl)anilines | S12-S21     |
| References                                                   | S21-S21     |
| Copies of <sup>1</sup> H and <sup>13</sup> C NMR spectra     | S22-S117    |

**General.** All  $^1\text{H}$  and  $^{13}\text{C}$  NMR spectra were recorded at 300 and 75.5 MHz or 400 and 100 MHz. Thin-layer chromatography was performed using commercially prepared 60-mesh silica gel plates, and visualization was effected with short wavelength UV light (254 nm). All melting points are uncorrected. High resolution mass spectra were recorded on a double focusing magnetic sector mass spectrometer using EI at a voltage of 70 eV. All reagents were used directly as obtained commercially unless otherwise noted. **Preparation of 2-Iodoanilines.** 2-Iodo-4-nitroaniline,<sup>1</sup> 2-iodo-4-methylaniline,<sup>1</sup> 2-iodo-5-methoxyaniline<sup>1</sup>, ethyl 4-(*n*-butylamino)-3-iodobenzoate<sup>2</sup> and methyl 3-iodo-4-(methylamino)benzoate<sup>3</sup> were prepared according to the literature procedures. **Ethyl 4-(*n*-butylamino)-3-iodobenzoate.** The compound was obtained as a yellow oil:  $^1\text{H}$  NMR (300 MHz,  $\text{CDCl}_3$ )  $\delta$  0.98 (t,  $J = 7.2$  Hz, 3H), 1.36 (t,  $J = 6.9$  Hz, 3H), 1.40-1.52 (m, 2H), 1.63-1.72 (m, 2H), 3.18-3.22 (m, 2H), 4.31 (q,  $J = 7.2$  Hz, 2H), 4.61 (s, 1H), 6.49 (d,  $J = 8.4$  Hz, 1H), 7.89 (d,  $J = 8.4$  Hz, 1H), 8.33 (s, 1H);  $^{13}\text{C}$  NMR (75 MHz,  $\text{CDCl}_3$ )  $\delta$  14.0, 14.6, 20.4, 31.2, 43.8, 60.7, 83.8, 108.9, 120.0, 131.7, 140.8, 150.7, 165.7; IR (neat,  $\text{cm}^{-1}$ ) 3394, 2959, 2930, 2871, 1711. The product was used for the next step without further characterization.

**General Procedure for Preparation of the *N,N*-Dialkyl-*o*-iodoanilines.** These compounds were prepared by a procedure reported by Cadogan.<sup>4</sup> A solution of the corresponding aniline (2.0 mmol) and iodomethane (0.85 g, 6.0 mmol) in DMF (10 ml) containing  $\text{K}_2\text{CO}_3$  (0.55 g, 4.0 mmol) was stirred for 48 h at room temperature. Water (10 ml) was then added, and the solution was extracted with

ethyl ether (3 x 10 ml). The organic extracts were washed with water (4 x 20 ml) to remove any remaining DMF, and then dried ( $\text{Na}_2\text{SO}_4$ ) and the solvent was removed under reduced pressure to yield the crude product, which was further purified by flash chromatography on silica gel using ethyl acetate/hexane as the eluent.

### ***N,N*-Dialkyl-2-iodoanilines Prepared**

***N,N*-Dimethyl-2-iodoaniline (1).** The product was obtained as a yellow oil:  $^1\text{H}$  NMR (300 MHz,  $\text{CDCl}_3$ )  $\delta$  2.76 (s, 6H), 6.76 (t,  $J = 8.2$  Hz, 1H), 7.08 (d,  $J = 9.3$  Hz, 1H), 7.30 (t,  $J = 7.7$  Hz, 1H), 7.83 (d,  $J = 7.8$  Hz, 1H);  $^{13}\text{C}$  NMR (75 MHz,  $\text{CDCl}_3$ )  $\delta$  45.2, 97.3, 120.6, 125.2, 129.2, 140.4, 155.1; IR (neat,  $\text{cm}^{-1}$ ) 3002, 1944, 2830, 2783; HRMS calcd for  $\text{C}_8\text{H}_{10}\text{IN}$  246.98580. Found 246.98605.

***N,N*-Dimethyl-2-iodo-4-nitroaniline (9).** The compound was obtained as a yellow oil:  $^1\text{H}$  NMR (300 MHz,  $\text{CDCl}_3$ )  $\delta$  2.94 (s, 6H), 6.98 (d,  $J = 9.0$  Hz, 1H), 8.16 (d,  $J = 9.0$  Hz, 1H), 8.69 (s, 1H);  $^{13}\text{C}$  NMR (75 MHz,  $\text{CDCl}_3$ )  $\delta$  44.4, 90.6, 118.6, 124.8, 136.8, 160.7; IR (neat,  $\text{cm}^{-1}$ ) 2947, 2871, 2843, 2794; HRMS calcd for  $\text{C}_8\text{H}_9\text{IN}_2\text{O}_2$  291.97088. Found 291.97104.

***N,N*-Dimethyl-2-iodo-4-methylaniline (13).** The product was obtained as a yellow oil:  $^1\text{H}$  NMR (300 MHz,  $\text{CDCl}_3$ )  $\delta$  2.26 (s, 3H), 2.72 (s, 6H), 6.99 (d,  $J = 9.0$  Hz, 1H), 7.11 (d,  $J = 9.0$  Hz, 1H), 7.68 (s, 1H);  $^{13}\text{C}$  NMR (75 MHz,  $\text{CDCl}_3$ )  $\delta$  20.4, 45.4, 97.6, 120.3, 130.0, 135.1, 140.7, 152.7; IR (neat,  $\text{cm}^{-1}$ ) 3058, 2926, 2855, 2227, 1464, 1435, 749; HRMS calcd for  $\text{C}_9\text{H}_{12}\text{IN}$  261.00165. Found 261.00198.

***N,N*-Dimethyl-2-iodo-5-methoxyaniline (17).** The compound was obtained as a yellow oil:  $^1\text{H}$  NMR (400 MHz,  $\text{CDCl}_3$ )  $\delta$  2.75 (s, 6H), 3.78 (s, 3H), 6.38 (d,  $J =$

10.4 Hz, 1H), 6.66 (s, 1H), 7.68 (d,  $J = 8.8$  Hz, 1H);  $^{13}\text{C}$  NMR (75 MHz,  $\text{CDCl}_3$ )  $\delta$  45.0, 55.5, 85.4, 107.8, 110.0, 140.3, 156.1, 160.9; IR (neat,  $\text{cm}^{-1}$ ) 2293, 2829, 2780; HRMS calcd for  $\text{C}_9\text{H}_{12}\text{INO}$  276.99637. Found 276.99697.

**Ethyl 4-(*n*-butylmethylamino)-3-iodobenzoate (21).** The product was obtained as a yellow oil:  $^1\text{H}$  NMR (300 MHz,  $\text{CDCl}_3$ )  $\delta$  0.91 (t,  $J = 7.5$  Hz, 3H), 1.30-1.40 (m, 5H), 2.78 (s, 3H), 3.03 (t,  $J = 9.0$  Hz, 2H), 4.35 (q,  $J = 7.2$  Hz, 2H), 7.02 (d,  $J = 8.4$  Hz, 1H), 7.96 (dd,  $J = 8.4, 2.1$  Hz, 1H), 8.49 (d,  $J = 2.1$  Hz, 1H);  $^{13}\text{C}$  NMR (75 MHz,  $\text{CDCl}_3$ )  $\delta$  14.2, 14.6, 20.4, 29.7, 41.9, 56.1, 61.2, 95.7, 120.7, 126.2, 130.5, 142.0, 158.9, 165.4; IR (neat,  $\text{cm}^{-1}$ ) 3004, 2922, 1713; HRMS calcd for  $\text{C}_{14}\text{H}_{20}\text{INO}_2$  361.05388. Found 361.05433.

***N*-Cyclohexyl-*N*-methyl-2-iodoaniline (25).** The product was obtained as a yellow oil:  $^1\text{H}$  NMR (400 MHz,  $\text{CDCl}_3$ )  $\delta$  1.08-1.13 (m, 4H), 1.32 (q,  $J = 12.0$  Hz, 2H), 1.74-1.84 (m, 4H), 2.62 (s, 3H), 2.97-3.03 (m, 1H), 6.75 (t,  $J = 7.2$  Hz, 1H), 7.07 (d,  $J = 7.2$  Hz, 1H), 7.27 (t,  $J = 8.0$  Hz, 1H), 7.85 (d,  $J = 8.0$  Hz, 1H);  $^{13}\text{C}$  NMR (75 MHz,  $\text{CDCl}_3$ )  $\delta$  25.8, 26.3, 29.3, 35.6, 62.2, 100.2, 123.8, 125.1, 128.6, 140.2, 154.3; HRMS calcd for  $\text{C}_{13}\text{H}_{18}\text{IN}$  315.00637. Found 315.00684.

#### **Procedure for the Preparation of Methyl 3-iodo-4-**

**[methyl(phenyl)amino]benzoate (27).** This compound was prepared by a procedure reported by Larock.<sup>5</sup> To a solution of MeCN (24 mL), methyl 3-iodo-4-(methylamino)benzoate (0.43 g, 1.5 mmol) and 2-(trimethylsilyl)phenyl triflate (1.5 equiv.) was added CsF (2.0 equiv.). The reaction mixture was allowed to stir at room temperature for 2 d and the resulting solution was washed by brine (40 mL) and extracted with diethyl ether (60 mL). The combined ether fractions were dried over  $\text{Na}_2\text{SO}_4$  and concentrated under reduced pressure. The residue was

purified by flash chromatography (silica gel, Hexane/EtOAc = 9:1), to afford the desired product (0.48 g, 87%) as a colorless solid: mp 78-79 °C; <sup>1</sup>H NMR (300 MHz, CDCl<sub>3</sub>) δ 3.25 (s, 3H), 3.93 (s, 3H), 6.61-6.64 (m, 2H), 6.84 (t, *J* = 7.2 Hz, 1H), 7.19-7.26 (m, 3H), 8.03 (dd, *J* = 8.4, 2.1 Hz, 1H), 8.61 (d, *J* = 1.8 Hz, 1H); <sup>13</sup>C NMR (75 MHz, CDCl<sub>3</sub>) δ 39.8, 52.6, 99.8, 115.2, 119.2, 128.7, 129.2, 129.3, 131.4, 142.1, 148.3, 155.3, 165.5; IR (neat, cm<sup>-1</sup>) 3088, 2949, 1724, 1586; HRMS *m/z* calcd for C<sub>15</sub>H<sub>14</sub>INO<sub>2</sub>: 367.0069. Found: 367.0076.

### **General Procedure for Synthesis of the *N,N*-Dialkyl-2-(1-alkynyl)anilines.**

To a solution of Et<sub>3</sub>N (12.5 ml), PdCl<sub>2</sub>(PPh<sub>3</sub>)<sub>2</sub> (0.070 g, 2 mol %), 5.0 mmol of *N,N*-dialkyl-*o*-iodoaniline and 6.0 mmol of terminal acetylene (stirring for 5 min beforehand), CuI (0.010 g, 1 mol %) was added and stirring was continued for another 2 min before flushing with Ar. The flask was then sealed. The mixture was allowed to stir at room temperature for the desired time and the resulting solution was filtered, washed with a satd aq NaCl solution and extracted with diethyl ether (2 x 10 ml). The combined ether fractions were dried over Na<sub>2</sub>SO<sub>4</sub> and concentrated under vacuum to yield the crude product. The crude product was purified by flash chromatography on silica gel using ethyl acetate/hexane as the eluent.

### ***N,N*-Dialkyl-2-(1-alkynyl)anilines Prepared.**

***N,N*-Dimethyl-2-(phenylethynyl)aniline (2).** The product was obtained as a yellow oil: <sup>1</sup>H NMR (400 MHz, CDCl<sub>3</sub>) δ 3.01 (s, 6H), 6.88-6.94 (m, 2H), 7.25 (t, *J* = 6.3 Hz, 1H), 7.31-7.37 (m, 3H), 7.49 (d, *J* = 5.7 Hz, 1H), 7.54 (d, *J* = 7.2 Hz, 2H); <sup>13</sup>C NMR (100 MHz, CDCl<sub>3</sub>) δ 43.8, 89.1, 95.0, 115.3, 117.2, 120.7, 124.1,

128.2, 128.5, 129.5, 131.5, 134.6, 155.0; IR (neat,  $\text{cm}^{-1}$ ) 3059, 2943, 2833, 2785, 2209; HRMS calcd for  $\text{C}_{16}\text{H}_{15}\text{N}$  221.12045. Found 221.12076.

***N,N*-Dimethyl-2-(3,3-dimethyl-1-butynyl)aniline (3).** The product was obtained as a yellow oil:  $^1\text{H}$  NMR (400 MHz,  $\text{CDCl}_3$ )  $\delta$  1.34 (s, 9H), 2.92 (s, 6H), 6.80-6.86 (m, 2H), 7.17 (t,  $J = 7.6$  Hz, 1H), 7.34 (d,  $J = 7.6$  Hz, 1H);  $^{13}\text{C}$  NMR (100 MHz,  $\text{CDCl}_3$ )  $\delta$  28.5, 31.2, 43.6, 78.5, 104.0, 116.2, 116.9, 120.5, 128.5, 134.5, 154.6; IR (neat,  $\text{cm}^{-1}$ ) 3004, 2923, 2147; HRMS calcd for  $\text{C}_{14}\text{H}_{18}\text{N}$  200.14392. Found 200.14417.

***N,N*-Dimethyl-2-(1-octynyl)aniline (4).** The product was obtained as a yellow oil:  $^1\text{H}$  NMR (300 MHz,  $\text{CDCl}_3$ )  $\delta$  0.90 (t,  $J = 6.9$  Hz, 3H), 1.29-1.34 (m, 4 H), 1.46-1.49 (m, 2H), 1.62 (q,  $J = 3.8$  Hz, 2H), 2.47 (t,  $J = 7.2$  Hz, 2H), 2.91 (s, 3H), 6.83-6.90 (m, 2H), 7.18 (t,  $J = 5.0$  Hz, 1H), 7.36 (d,  $J = 7.5$  Hz, 1H);  $^{13}\text{C}$  NMR (75 MHz,  $\text{CDCl}_3$ )  $\delta$  14.3, 20.1, 22.8, 28.9, 29.0, 31.6, 43.8, 79.7, 96.1, 116.8, 117.1, 120.9, 128.5, 134.5, 154.8; IR (neat,  $\text{cm}^{-1}$ ) 2930, 2858, 2782, 2242; HRMS calcd for  $\text{C}_{16}\text{H}_{23}\text{N}$  229.18305. Found 229.18336.

***N,N*-Dimethyl-2-(cyclohex-1-enylethynyl)aniline (5).** The product was obtained as a yellow oil:  $^1\text{H}$  NMR (300 MHz,  $\text{CDCl}_3$ )  $\delta$  1.62-1.68 (m, 4H), 2.13-2.15 (m, 2H), 2.25-2.27 (m, 2H), 2.93 (s, 6H), 6.18-6.19 (m, 1H), 6.84-6.89 (m, 2H), 7.18 (t,  $J = 7.5$  Hz, 1H), 7.37 (d,  $J = 7.5$  Hz, 1H);  $^{13}\text{C}$  NMR (75 MHz,  $\text{CDCl}_3$ )  $\delta$  21.8, 22.5, 25.9, 29.3, 43.6, 86.3, 96.8, 115.9, 117.0, 120.6, 121.3, 128.8, 134.2, 134.4, 154.6; IR (neat,  $\text{cm}^{-1}$ ) 2932, 2859, 2832, 2196; HRMS calcd for  $\text{C}_{16}\text{H}_{19}\text{N}$  225.15175. Found 225.15209.

***N,N*-Dimethyl-2-(trimethylsilylethynyl)aniline (6).** The product was obtained as a yellow oil:  $^1\text{H}$  NMR (300 MHz,  $\text{CDCl}_3$ )  $\delta$  0.25 (s, 9H), 2.98 (s, 3H), 6.83 (dd,

$J = 9.0, 6.0$  Hz, 2H), 7.21 (t,  $J = 9.0$  Hz, 1H), 7.41 (d,  $J = 9.0$  Hz, 1H);  $^{13}\text{C}$  NMR (75 MHz,  $\text{CDCl}_3$ )  $\delta$  0.2, 43.5, 99.7, 104.9, 114.9, 116.9, 120.3, 129.6, 135.1, 155.3; IR (neat,  $\text{cm}^{-1}$ ) 3059, 2959, 2920, 2155, 1461, 1434, 1249, 843; HRMS calcd for  $\text{C}_{13}\text{H}_{18}\text{NSi}$  216.12085. Found 216.12100.

**6-[2-(Dimethylamino)phenyl]-5-hexynenitrile (7).** The product was obtained as a yellow oil:  $^1\text{H}$  NMR (400 MHz,  $\text{CDCl}_3$ )  $\delta$  1.97 (t,  $J = 7.2$  Hz, 2H), 2.57 (t,  $J = 7.2$  Hz, 2H), 2.67 (t,  $J = 6.8$  Hz, 2H), 2.90 (s, 6H), 6.87 (t,  $J = 7.6$  Hz, 1H), 6.91 (d,  $J = 8.0$  Hz, 1H), 7.22 (t,  $J = 8.0$  Hz, 1H), 7.36 (d,  $J = 7.6$  Hz, 1H);  $^{13}\text{C}$  NMR (100 MHz,  $\text{CDCl}_3$ )  $\delta$  16.3, 19.1, 24.9, 43.8, 81.6, 92.3, 115.9, 117.3, 119.4, 121.0, 129.1, 134.4, 155.0; IR (neat,  $\text{cm}^{-1}$ ) 3061, 2942, 2834, 2785, 2247; HRMS calcd for  $\text{C}_{14}\text{H}_{16}\text{N}_2$  212.13135. Found 212.13172.

***N,N*-Dimethyl-2-(5-chloro-1-pentynyl)aniline (8).** The product was obtained as a yellow oil:  $^1\text{H}$  NMR (300 MHz,  $\text{CDCl}_3$ )  $\delta$  2.04-2.11 (m, 2H), 2.68 (t,  $J = 6.8$  Hz, 2H), 2.91 (s, 6H), 3.74 (t,  $J = 6.3$  Hz, 2H), 6.84-6.92 (m, 2H), 7.21 (t,  $J = 7.5$  Hz, 1H), 7.36 (d,  $J = 7.5$  Hz, 1H);  $^{13}\text{C}$  NMR (75 MHz,  $\text{CDCl}_3$ )  $\delta$  17.6, 31.7, 43.8, 44.0, 80.8, 93.6, 116.3, 117.3, 121.0, 128.9, 134.5, 154.9; IR (neat,  $\text{cm}^{-1}$ ) 2943, 2832, 2784, 2259; HRMS calcd for  $\text{C}_{13}\text{H}_{16}\text{ClN}$  221.69713. Found 221.69754.

***N,N*-Dimethyl-4-nitro-2-(phenylethynyl)aniline (10).** The product was obtained as a yellow oil:  $^1\text{H}$  NMR (400 MHz,  $\text{CDCl}_3$ )  $\delta$  3.26 (s, 6H), 6.78 (d,  $J = 9.2$  Hz, 1H), 7.36-7.38 (m, 3H), 7.50-7.52 (m, 2H), 8.06 (dd,  $J = 9.2, 2.4$  Hz, 1H), 8.35 (d,  $J = 2.4$  Hz, 1H);  $^{13}\text{C}$  NMR (100 MHz,  $\text{CDCl}_3$ )  $\delta$  42.7, 87.7, 95.3, 110.4, 114.7, 123.0, 125.1, 128.6, 128.7, 131.1, 131.4, 138.5, 157.5; IR (neat,  $\text{cm}^{-1}$ ) 2954, 2917, 2849, 2133; HRMS calcd for  $\text{C}_{16}\text{H}_{14}\text{N}_2\text{O}_2$  266.10553. Found 266.10592.

***N,N*-Dimethyl-4-nitro-2-(1-octynyl)aniline (11).** The product was obtained as a yellow oil:  $^1\text{H}$  NMR (300 MHz,  $\text{CDCl}_3$ )  $\delta$  0.91 (t,  $J = 6.8$  Hz, 3H), 1.30-1.34 (m, 4H), 1.43-1.48 (m, 2H), 1.62 (q,  $J = 7.2$  Hz, 2H), 2.45 (t,  $J = 7.1$  Hz, 2H), 3.15 (s, 6H), 6.73 (d,  $J = 9.3$  Hz, 1H), 7.99 (dd,  $J = 9.3, 2.7$  Hz, 1H), 8.20 (d,  $J = 2.7$  Hz, 1H);  $^{13}\text{C}$  NMR (75 MHz,  $\text{CDCl}_3$ )  $\delta$  14.2, 19.9, 22.7, 28.7, 28.9, 31.5, 42.8, 78.7, 97.3, 112.4, 114.9, 124.5, 131.4, 138.9, 158.0; IR (neat,  $\text{cm}^{-1}$ ) 2930, 2857, 2806, 2224; HRMS calcd for  $\text{C}_{16}\text{H}_{22}\text{N}_2\text{O}_2$  274.16813. Found 274.16830.

***N,N*-Dimethyl-2-(cyclohex-1-enylethynyl)-4-nitroaniline (12).** The product was obtained as a yellow oil:  $^1\text{H}$  NMR (400 MHz,  $\text{CDCl}_3$ )  $\delta$  1.61-1.71 (m, 4H), 2.15-2.20 (m, 2H), 2.20-2.22 (m, 2H), 3.18 (s, 6H), 6.20-6.21 (m, 1H), 6.73 (d,  $J = 8.0$  Hz, 1H), 7.99 (d,  $J = 12.0$  Hz, 1H), 8.22 (s, 1H);  $^{13}\text{C}$  NMR (100 MHz,  $\text{CDCl}_3$ )  $\delta$  21.5, 22.3, 25.8, 28.8, 42.7, 85.0, 97.5, 111.5, 114.6, 120.7, 124.6, 131.0, 135.4, 138.7, 157.5; IR (neat,  $\text{cm}^{-1}$ ) 2924, 2853, 2354, 1454, 1432, 749; HRMS calcd for  $\text{C}_{16}\text{H}_{18}\text{N}_2\text{O}_2$  270.13683. Found 270.13735.

***N,N*-Dimethyl-4-methyl-2-(phenylethynyl)aniline (14).** The product was obtained as a yellow oil:  $^1\text{H}$  NMR (300 MHz,  $\text{CDCl}_3$ )  $\delta$  2.26 (s, 3H), 2.95 (s, 6H), 6.83 (d,  $J = 8.1$  Hz, 1H), 7.04 (d,  $J = 9.0$  Hz, 1H), 7.22-7.33 (m, 4H), 7.52-7.55 (m, 2H);  $^{13}\text{C}$  NMR (100 MHz,  $\text{CDCl}_3$ )  $\delta$  20.5, 44.0, 89.1, 94.7, 115.6, 117.3, 124.2, 128.2, 128.5, 130.3, 130.3, 131.6, 134.8, 152.8; IR (neat,  $\text{cm}^{-1}$ ) 3378, 3057, 2925, 2853, 1453, 1433, 750; HRMS calcd for  $\text{C}_{17}\text{H}_{17}\text{N}$  235.13610. Found 235.13582.

***N,N*-Dimethyl-4-methyl-2-(1-octynyl)aniline (15).** The product was obtained as a yellow oil:  $^1\text{H}$  NMR (400 MHz,  $\text{CDCl}_3$ )  $\delta$  0.83 (t,  $J = 6.0$  Hz, 3H), 1.24-1.26 (m, 4H), 1.37-1.41 (m, 2H), 1.55 (q,  $J = 8.0$  Hz, 2H), 2.16 (s, 3H), 2.40 (t,  $J = 8.0$  Hz,



2H), 2.79 (s, 6H), 6.73 (d,  $J = 8.0$  Hz, 1H), 6.92 (d,  $J = 8.0$  Hz, 1H), 7.12 (s, 1H);  $^{13}\text{C}$  NMR (100 MHz,  $\text{CDCl}_3$ )  $\delta$  14.3, 20.1, 20.4, 22.8, 28.9, 29.0, 31.6, 44.0, 79.6, 95.7, 116.9, 117.2, 129.2, 130.4, 134.9, 152.5; IR (neat,  $\text{cm}^{-1}$ ) 3378, 3057, 2925, 2853, 1453, 1433, 750; HRMS calcd for  $\text{C}_{17}\text{H}_{25}\text{N}$  243.19870. Found 243.19908.

***N,N*-Dimethyl-2-(cyclohex-1-enylethynyl)-4-methylaniline (16).** The product was obtained as a yellow oil:  $^1\text{H}$  NMR (400 MHz,  $\text{CDCl}_3$ )  $\delta$  1.52-1.63 (m, 4H), 2.05-2.06 (m, 2H), 2.15-2.17 (m, 5H), 2.81 (s, 3H), 6.09-6.11 (m, 1H), 6.71 (d,  $J = 8.0$  Hz, 1H), 6.92 (d,  $J = 8.0$  Hz, 1H), 7.12 (s, 1H);  $^{13}\text{C}$  NMR (100 MHz,  $\text{CDCl}_3$ )  $\delta$  20.4, 21.8, 22.6, 25.9, 29.3, 43.8, 86.2, 96.6, 116.1, 117.0, 121.3, 129.5, 130.1, 134.4, 134.5, 152.5; IR (neat,  $\text{cm}^{-1}$ ) 3378, 3057, 2925, 2853, 1453, 1433, 750; HRMS calcd for  $\text{C}_{17}\text{H}_{21}\text{N}$  239.16740. Found 239.16779.

***N,N*-Dimethyl-5-methoxy-2-(phenylethynyl)aniline (18).** The product was obtained as a yellow oil:  $^1\text{H}$  NMR (300 MHz,  $\text{CDCl}_3$ )  $\delta$  2.99 (s, 6H), 3.79 (s, 3H), 6.44 (d,  $J = 8.0$  Hz, 2H), 7.23-7.34 (m, 3H), 7.41 (d,  $J = 8.8$  Hz, 1H), 7.51 (d,  $J = 8.0$  Hz, 2H);  $^{13}\text{C}$  NMR (75 MHz,  $\text{CDCl}_3$ )  $\delta$  43.5, 55.4, 89.2, 93.5, 103.8, 105.3, 107.6, 124.4, 127.8, 131.2, 135.6, 156.3, 160.8; IR (neat,  $\text{cm}^{-1}$ ) 2924, 2853, 2354, 1454, 1432, 749; HRMS calcd for  $\text{C}_{17}\text{H}_{17}\text{NO}$  251.13101. Found 251.13132.

***N,N*-Dimethyl-5-methoxy-2-(1-octynyl)aniline (19).** The product was obtained as a yellow oil:  $^1\text{H}$  NMR (300 MHz,  $\text{CDCl}_3$ )  $\delta$  0.90 (t,  $J = 6.8$  Hz, 3H), 1.30-1.33 (m, 4H), 1.42-1.49 (m, 2H), 1.62 (q,  $J = 7.6$  Hz, 2H), 2.45 (t,  $J = 6.8$  Hz, 2H), 2.90 (s, 6H), 3.77 (s, 3H), 6.36-6.42 (m, 2H), 7.29 (d,  $J = 8.0$  Hz, 1H);  $^{13}\text{C}$  NMR (75 MHz,  $\text{CDCl}_3$ )  $\delta$  14.2, 20.0, 22.8, 28.9, 29.1, 31.6, 43.6, 55.3, 79.5, 94.2, 104.1,

105.3, 109.2, 135.4, 156.1, 160.0; IR (neat,  $\text{cm}^{-1}$ ) 2924, 2853, 2354, 1454, 1432, 749; HRMS calcd for  $\text{C}_{17}\text{H}_{25}\text{NO}$  259.19361. Found 259.19389.

***N,N*-Dimethyl-2-(cyclohex-1-enylethynyl)-5-methoxyaniline (20).** The product was obtained as a yellow oil:  $^1\text{H}$  NMR (400 MHz,  $\text{CDCl}_3$ )  $\delta$  1.59-1.68 (m, 4H), 2.12-2.14 (m, 2H), 2.22-2.24 (m, 2H), 2.92 (s, 6H), 3.78 (s, 3H), 6.13-6.15 (m, 1H), 6.38-6.41 (m, 2H), 7.29 (d,  $J = 8.4$  Hz, 1H);  $^{13}\text{C}$  NMR (100 MHz,  $\text{CDCl}_3$ )  $\delta$  21.8, 22.6, 25.9, 29.4, 43.4, 55.3, 86.2, 95.3, 103.8, 105.2, 108.3, 121.4, 133.6, 135.3, 156.0, 160.3; IR (neat,  $\text{cm}^{-1}$ ) 2932, 2834, 2786, 2194; HRMS calcd for  $\text{C}_{17}\text{H}_{21}\text{NO}$  255.16231. Found 255.16270.

**Ethyl 4-(*N*-*n*-butyl-*N*-methylanino)-3-(phenylethynyl)benzoate (22).** The product was obtained as a yellow oil:  $^1\text{H}$  NMR (400 MHz,  $\text{CDCl}_3$ )  $\delta$  0.87 (t,  $J = 7.4$  Hz, 3H), 1.25-1.31 (m, 2H), 1.37 (t,  $J = 7.0$  Hz, 3H), 1.63-1.69 (m, 2H), 3.02 (s, 3H), 3.54 (t,  $J = 7.8$  Hz, 2H), 4.34 (q,  $J = 7.2$  Hz, 2H), 6.81 (d,  $J = 8.8$  Hz, 1H), 7.31-7.35 (m, 3H), 7.49-7.51 (m, 2H), 7.86 (d,  $J = 8.8$  Hz, 1H), 8.15 (s, 1H);  $^{13}\text{C}$  NMR (100 MHz,  $\text{CDCl}_3$ )  $\delta$  14.0, 14.6, 20.4, 30.1, 39.8, 54.9, 60.7, 89.0, 94.2, 111.7, 115.8, 120.5, 123.8, 128.2, 128.5, 130.8, 131.3, 137.1, 156.6, 166.2; IR (neat,  $\text{cm}^{-1}$ ) 2957, 2929, 2870, 2203; HRMS calcd for  $\text{C}_{22}\text{H}_{25}\text{NO}_2$  335.18853. Found 335.18887.

**Ethyl 4-(*N*-*n*-butyl-*N*-methylanino)-3-(1-octynyl)benzoate (23).** The product was obtained as a yellow oil:  $^1\text{H}$  NMR (400 MHz,  $\text{CDCl}_3$ )  $\delta$  0.81-0.87 (m, 6H), 1.19-1.40 (m, 11H), 1.50-1.58 (m, 4H), 2.87 (s, 3H), 3.39 (q,  $J = 8.0$  Hz, 2H), 4.25 (q,  $J = 8.0$  Hz, 2H), 6.71 (d,  $J = 8.0$  Hz, 1H), 7.73 (d,  $J = 8.0$  Hz, 1H), 7.94 (s, 1H);  $^{13}\text{C}$  NMR (100 MHz,  $\text{CDCl}_3$ )  $\delta$  14.2, 14.3, 14.6, 20.1, 20.4, 22.8, 28.9, 28.9, 30.0, 31.6, 39.7, 54.9, 60.6, 79.6, 95.7, 113.4, 116.0, 120.8, 130.1, 137.0,

156.9, 166.4; IR (neat,  $\text{cm}^{-1}$ ) 2924, 2853, 2354, 1454, 1432, 749; HRMS calcd for  $\text{C}_{22}\text{H}_{33}\text{NO}_2$  343.25113. Found 343.25150.

**Ethyl 4-(*N*-*n*-butyl-*N*-methylamino)-3-(cyclohex-1-enylethynyl)benzoate (24).**

The product was obtained as a yellow oil:  $^1\text{H}$  NMR (400 MHz,  $\text{CDCl}_3$ )  $\delta$  0.83 (t,  $J = 8.0$  Hz, 3H), 1.20-1.28 (m, 5H), 1.54-1.59 (m, 6H), 2.06-2.15 (m, 4H), 2.89 (s, 3H), 3.39 (q,  $J = 8.0$  Hz, 2H), 4.24 (t,  $J = 8.0$  Hz, 2H), 6.09 (m, 1H), 6.69 (d,  $J = 8.0$  Hz, 1H), 7.73 (d,  $J = 8.0$  Hz, 1H), 7.95 (s, 1H);  $^{13}\text{C}$  NMR (100 MHz,  $\text{CDCl}_3$ )  $\delta$  14.1, 14.6, 20.4, 21.7, 22.5, 25.9, 29.2, 30.0, 39.7, 54.8, 60.6, 86.1, 96.3, 112.6, 115.8, 120.5, 121.2, 130.3, 134.5, 136.8, 156.5, 166.3; IR (neat,  $\text{cm}^{-1}$ ) 2924, 2853, 2354, 1454, 1432, 749; HRMS calcd for  $\text{C}_{22}\text{H}_{29}\text{NO}_2$  339.21983. Found 339.22025.

***N*-Cyclohexyl-*N*-methyl-2-(phenylethynyl)aniline (26).** The product was obtained as a yellow oil:  $^1\text{H}$  NMR (400 MHz,  $\text{CDCl}_3$ )  $\delta$  1.07-1.28 (m, 4H), 1.51-1.62 (m, 2H), 1.78 (d,  $J = 13.2$  Hz, 2H), 1.88 (d,  $J = 12.0$  Hz, 2H), 2.77 (s, 3H), 3.80-3.85 (m, 1H), 6.87 (t,  $J = 7.2$  Hz, 1H), 6.93 (d,  $J = 8.0$  Hz, 1H), 7.23 (d,  $J = 7.2$  Hz, 1H), 7.30-7.33 (m, 3H), 7.50 (t,  $J = 8.0$  Hz, 3H);  $^{13}\text{C}$  NMR (100 MHz,  $\text{CDCl}_3$ )  $\delta$  26.3, 26.4, 29.9, 32.8, 62.6, 89.2, 94.3, 116.0, 119.0, 120.3, 124.2, 128.0, 128.5, 129.1, 131.5, 134.7, 154.8; IR (neat,  $\text{cm}^{-1}$ ) 3378, 3057, 2925, 2853, 1453, 1433, 750; HRMS calcd for  $\text{C}_{21}\text{H}_{23}\text{N}$  289.0144. Found 289.0251.

**Methyl 4-[methyl(phenyl)amino]-3-(phenylethynyl)benzoate (28).** The product was obtained as a light yellow oil:  $^1\text{H}$  NMR (300 MHz,  $\text{CDCl}_3$ )  $\delta$  3.48 (s, 3H), 3.94 (s, 3H), 6.95-6.98 (m, 3H), 7.18-7.31 (m, 8H), 8.00 (dd,  $J = 8.4, 1.8$  Hz, 1H), 8.26 (d,  $J = 2.1$  Hz, 1H);  $^{13}\text{C}$  NMR (75 MHz,  $\text{CDCl}_3$ )  $\delta$  41.1, 52.4, 87.2, 96.4, 118.85, 118.9, 121.1, 123.3, 124.1, 125.0, 128.4, 128.5, 129.3, 130.9, 131.8,

136.2, 148.8, 154.3, 166.5; IR (neat,  $\text{cm}^{-1}$ ) 3059, 2949, 2885, 1719, 1592; HRMS  $m/z$  calcd for  $\text{C}_{23}\text{H}_{19}\text{NO}_2$ : 341.1416. Found: 341.1416.

**General Procedure for Iodocyclization.** To a solution of 0.25 mmol of the *N,N*-dialkyl-2-(1-alkynyl)aniline and 3 ml of  $\text{CH}_2\text{Cl}_2$ , 2 equivs of  $\text{I}_2$  dissolved in 2 ml of  $\text{CH}_2\text{Cl}_2$  was added gradually. The reaction mixture was flushed with Ar and allowed to stir at room temperature for the desired time. The excess  $\text{I}_2$  was removed by washing with a satd aq soln of  $\text{Na}_2\text{S}_2\text{O}_3$ . The aqueous solution was then extracted by diethyl ether (2 x 10 ml). The combined ether layers were dried over anhydrous  $\text{Na}_2\text{SO}_4$  and concentrated under a vacuum to yield the crude product, which was purified by flash chromatography on silica gel using ethyl acetate/hexanes as the eluent.

### 3-Iodoindoles Prepared

**3-Iodo-1-methyl-2-phenylindole (29).** The product was obtained as a yellow oil:  $^1\text{H}$  NMR (400 MHz,  $\text{CDCl}_3$ )  $\delta$  3.63 (s, 3H), 7.21-7.28 (m, 3H), 7.43-7.51 (m, 6H);  $^{13}\text{C}$  NMR (100 MHz,  $\text{CDCl}_3$ )  $\delta$  32.2, 59.0, 110.0, 120.9, 121.6, 123.1, 128.6, 129.0, 130.5, 131.1, 131.8, 137.9, 141.9; IR (neat,  $\text{cm}^{-1}$ ) 3054, 2937; HRMS calcd for  $\text{C}_{15}\text{H}_{12}\text{IN}$  333.00145. Found 333.00194.

**2-*t*-Butyl-3-iodo-1-methylindole (30).** The product was obtained as a yellow oil:  $^1\text{H}$  NMR (400 MHz,  $\text{CDCl}_3$ )  $\delta$  1.67 (s, 9H), 3.92 (s, 3H), 7.16-7.25 (m, 3H), 7.52 (t,  $J = 6.4$  Hz, 1H);  $^{13}\text{C}$  NMR (100 MHz,  $\text{CDCl}_3$ )  $\delta$  30.4, 32.4, 34.7, 54.5, 109.0, 120.5, 122.4, 122.8, 131.6, 138.6, 144.4; IR (neat,  $\text{cm}^{-1}$ ) 3004, 2966, 2922; HRMS calcd for  $\text{C}_{13}\text{H}_{16}\text{IN}$  312.02492. Found 312.02515.

**2-*n*-Hexyl-3-iodo-1-methylindole (31).** The product was obtained as a yellow oil:  $^1\text{H}$  NMR (400 MHz,  $\text{CDCl}_3$ )  $\delta$  0.89 (t,  $J = 7.0$  Hz, 3H), 1.30-1.43 (m, 6H),

1.56-1.59 (m, 2H), 2.82 (t,  $J = 8.0$  Hz, 2H), 3.70 (s, 3H), 7.12-7.20 (m, 3H), 7.37 (d,  $J = 7.6$  Hz, 1H);  $^{13}\text{C}$  NMR (100 MHz,  $\text{CDCl}_3$ )  $\delta$  14.3, 22.8, 27.3, 29.2, 29.5, 30.8, 31.8, 57.9, 109.4, 120.4, 120.7, 122.1, 130.2, 137.6, 142.0; IR (neat,  $\text{cm}^{-1}$ ) 3053, 2926, 2855; HRMS calcd for  $\text{C}_{15}\text{H}_{20}\text{IN}$  341.06405. Found 341.06452.

**2-(Cyclohex-1-enyl)-3-iodo-1-methylindole (32).** The product was obtained as a yellow oil:  $^1\text{H}$  NMR (400 MHz,  $\text{CDCl}_3$ )  $\delta$  1.73-1.76 (m, 2H), 1.81-1.84 (m, 2H), 2.22-2.30 (m, 4H), 3.68 (s, 3H), 5.88-5.90 (m, 1H), 7.17-7.19 (m, 1H), 7.22-7.24 (m, 2H), 7.41 (d,  $J = 7.6$  Hz, 1H);  $^{13}\text{C}$  NMR (100 MHz,  $\text{CDCl}_3$ )  $\delta$  22.1, 22.9, 25.7, 29.4, 31.5, 57.0, 109.7, 120.5, 121.2, 122.4, 130.0, 130.3, 133.8, 137.3, 144.4; IR (neat,  $\text{cm}^{-1}$ ) 2921, 2850; HRMS calcd for  $\text{C}_{15}\text{H}_{16}\text{IN}$  337.03275. Found 337.03300.

**3-Iodo-1-methyl-2-(trimethylsilyl)indole (33).** The product was obtained as an inseparable mixture of the desired product and decomposed product. Due to the compound's instability, we were unable to further characterize this compound,

**4-(3-Iodo-1-methylindol-2-yl)butanenitrile (34).** The product was obtained as a yellow oil:  $^1\text{H}$  NMR (300 MHz,  $\text{CDCl}_3$ )  $\delta$  1.99 (q,  $J = 7.4$  Hz, 2H), 2.42 (t,  $J = 7.1$  Hz, 2H), 3.02 (t,  $J = 7.5$  Hz, 2H), 3.77 (s, 3H), 7.17-7.21 (m, 1H), 7.24-7.26 (m, 2H), 7.38 (d,  $J = 7.7$  Hz, 1H);  $^{13}\text{C}$  NMR (75 MHz,  $\text{CDCl}_3$ )  $\delta$  16.8, 25.4, 26.0, 30.9, 59.3, 109.6, 119.5, 120.8, 121.0, 122.8, 130.0, 137.8, 138.8; IR (neat,  $\text{cm}^{-1}$ ) 2935, 2869, 2246; HRMS calcd for  $\text{C}_{13}\text{H}_{13}\text{IN}_2$  324.01235. Found 324.01269.

**2-(3-Chloro-1-propyl)-3-iodo-1-methylindole (35).** The product was obtained as a yellow oil:  $^1\text{H}$  NMR (400 MHz,  $\text{CDCl}_3$ )  $\delta$  2.04-2.11 (m, 2H), 3.02 (t,  $J = 7.6$  Hz, 2H), 3.60 (t,  $J = 7.8$  Hz, 2H), 3.76 (s, 3H), 7.14-7.18 (m, 1H), 7.22-7.23 (m, 2H), 7.38 (d,  $J = 8.0$  Hz, 1H);  $^{13}\text{C}$  NMR (100 MHz,  $\text{CDCl}_3$ )  $\delta$  24.6, 30.9, 32.3,

44.4, 58.6, 109.6, 120.6, 120.8, 122.5, 130.1, 137.7, 140.0; IR (neat,  $\text{cm}^{-1}$ ) 2956, 2928, 2869; HRMS calcd for  $\text{C}_{12}\text{H}_{13}\text{ClIN}$  333.57813. Found 333.57851.

**3-Iodo-1-methyl-5-nitro-2-phenylindole (36).** The compound was obtained as pale yellow crystals: the compound decomposes at 125 °C;  $^1\text{H}$  NMR (300 MHz,  $\text{CDCl}_3$ )  $\delta$  3.74 (s, 3H), 7.36 (d,  $J = 9.0$  Hz, 1H), 7.46-7.59 (m, 2H), 7.53-7.57 (m, 3H), 8.19 (dd,  $J = 9.0, 2.4$  Hz, 1H), 8.45 (d,  $J = 2.4$  Hz, 1H);  $^{13}\text{C}$  NMR (100 MHz,  $\text{CDCl}_3$ )  $\delta$  32.7, 61.3, 110.2, 118.6, 119.0, 128.9, 129.8, 130.2, 130.7, 130.9, 140.9, 142.7, 145.4; IR (neat,  $\text{cm}^{-1}$ ) 2924, 2852; HRMS calcd for  $\text{C}_{15}\text{H}_{11}\text{IN}_2\text{O}_2$  378.01168. Found 378.01242.

**2-*n*-Hexyl-3-iodo-1-methyl-5-nitroindole (37).** The product was obtained as pale yellow crystals: the compound decomposes at 118 °C;  $^1\text{H}$  NMR (300 MHz,  $\text{CDCl}_3$ )  $\delta$  0.90 (t,  $J = 7.1$  Hz, 3H), 1.31-1.37 (m, 4H), 1.39-1.46 (m, 2H), 1.57-1.64 (m, 2H), 2.87 (t,  $J = 7.5$  Hz, 2H), 3.81 (s, 3H), 7.25 (d,  $J = 8.4$  Hz, 1H), 8.09 (dd,  $J = 9.0, 2.4$  Hz, 1H), 8.32 (d,  $J = 2.1$  Hz, 1H);  $^{13}\text{C}$  NMR (75 MHz,  $\text{CDCl}_3$ )  $\delta$  14.3, 16.6, 22.8, 27.6, 29.3, 31.4, 31.7, 60.3, 109.5, 117.8, 118.0, 130.0, 140.8, 142.4, 145.9; IR (neat,  $\text{cm}^{-1}$ ) 3004, 2964, 2923; HRMS calcd for  $\text{C}_{15}\text{H}_{19}\text{IN}_2\text{O}_2$  386.04913. Found 386.04988.

**2-(Cyclohex-1-enyl)-3-iodo-1-methyl-5-nitroindole (38).** The compound was obtained as pale yellow crystals: mp 112 °C;  $^1\text{H}$  NMR (300 MHz,  $\text{CDCl}_3$ )  $\delta$  1.76-1.85 (m, 4H), 2.22-2.32 (m, 4H), 3.74 (s, 3H), 5.95-5.96 (m, 1H), 7.24-7.27 (m, 1H), 8.08-8.12 (m, 1H), 8.34-8.35 (m, 1H);  $^{13}\text{C}$  NMR (100 MHz,  $\text{CDCl}_3$ )  $\delta$  22.0, 22.8, 25.7, 29.2, 32.0, 59.4, 109.9, 118.0, 118.5, 129.2, 130.0, 135.1, 140.5, 142.4, 147.9; IR (neat,  $\text{cm}^{-1}$ ) 3095, 2920, 2849, 2249, 1735, 1577, 1513, 1338; HRMS calcd for  $\text{C}_{15}\text{H}_{15}\text{IN}_2\text{O}_2$  382.01783. Found 382.01837.

**3-Iodo-1,5-dimethyl-2-phenylindole (39).** The product was obtained as a yellow oil:  $^1\text{H}$  NMR (400 MHz,  $\text{CDCl}_3$ )  $\delta$  2.42 (s, 3H), 3.54 (s, 3H), 7.03 (d,  $J = 8.0$  Hz, 1H), 7.10 (d,  $J = 8.0$  Hz, 1H), 7.20 (s, 1H), 7.37-7.41 (m, 5H);  $^{13}\text{C}$  NMR (400 MHz,  $\text{CDCl}_3$ )  $\delta$  21.6, 32.2, 58.4, 109.8, 121.2, 124.7, 128.6, 128.9, 130.4, 130.7, 131.1, 131.9, 136.4, 141.8; IR (neat,  $\text{cm}^{-1}$ ) 3055, 2919, 2849, 1576, 1475; HRMS calcd for  $\text{C}_{16}\text{H}_{14}\text{IN}$  347.01710. Found 347.01747.

**2-*n*-Hexyl-3-iodo-1,5-dimethylindole (40).** The product was obtained as a yellow oil:  $^1\text{H}$  NMR (400 MHz,  $\text{CDCl}_3$ )  $\delta$  0.83 (t,  $J = 6.8$  Hz, 3H), 1.24-1.34 (m, 6H), 1.49 (q,  $J = 7.6$  Hz, 2H), 2.39 (s, 3H), 2.73 (t,  $J = 8.0$  Hz, 2H), 3.61 (s, 3H), 6.94 (d,  $J = 8.0$  Hz, 1H), 7.01 (d,  $J = 8.0$  Hz, 1H), 7.08 (s, 1H);  $^{13}\text{C}$  NMR (400 MHz,  $\text{CDCl}_3$ )  $\delta$  14.3, 21.6, 22.8, 27.3, 29.2, 29.5, 30.8, 31.8, 57.3, 109.1, 120.4, 123.6, 129.8, 130.3, 136.0, 141.9; IR (neat,  $\text{cm}^{-1}$ ) 3055, 2919, 2849, 1576, 1475; HRMS calcd for  $\text{C}_{16}\text{H}_{22}\text{IN}$  355.07970. Found 355.08037.

**2-(Cyclohex-1-enyl)-3-iodo-1,5-dimethylindole (41).** The product was obtained as a yellow oil:  $^1\text{H}$  NMR (400 MHz,  $\text{CDCl}_3$ )  $\delta$  1.64-1.74 (m, 4H), 2.15-2.19 (m, 4H), 2.39 (s, 3H), 3.56 (s, 3H), 5.79 (m, 1H), 6.96 (d,  $J = 8.0$  Hz, 1H), 7.02 (d,  $J = 8.0$  Hz, 1H), 7.11 (s, 1H);  $^{13}\text{C}$  NMR (400 MHz,  $\text{CDCl}_3$ )  $\delta$  21.6, 22.1, 22.9, 25.7, 29.4, 31.5, 56.4, 109.5, 120.8, 124.0, 129.9, 130.0, 130.4, 133.6, 135.7, 144.4; IR (neat,  $\text{cm}^{-1}$ ) 3055, 2919, 2849, 1576, 1475; HRMS calcd for  $\text{C}_{16}\text{H}_{18}\text{IN}$  351.04840. Found 351.04879.

**3-Iodo-6-methoxy-1-methyl-2-phenylindole (42).** The product was obtained as a yellow oil:  $^1\text{H}$  NMR (400 MHz,  $\text{CDCl}_3$ )  $\delta$  3.60 (s, 3H), 3.89 (s, 3H), 6.77 (s, 1H), 6.89 (d,  $J = 12.0$  Hz, 1H), 7.37 (d,  $J = 12.0$  Hz, 1H), 7.40-7.51 (m, 5H);  $^{13}\text{C}$  NMR (100 MHz,  $\text{CDCl}_3$ )  $\delta$  32.2, 56.0, 58.7, 93.5, 110.7, 122.3, 125.0, 128.6, 128.8,

131.1, 131.9, 138.5, 140.9, 157.4; IR (neat,  $\text{cm}^{-1}$ ) 3378, 3057, 2925, 2853, 1453, 1433, 750; HRMS calcd for  $\text{C}_{16}\text{H}_{14}\text{INO}$  363.01202. Found 363.01270.

**2-*n*-Hexyl-3-iodo-6-methoxy-1-methylindole (43).** The product was obtained as a yellow oil:  $^1\text{H}$  NMR (400 MHz,  $\text{CDCl}_3$ )  $\delta$  0.90 (t,  $J = 6.8$  Hz, 3H), 1.31-1.33 (m, 4H), 1.40-1.42 (m, 2H), 1.56 (q,  $J = 7.6$  Hz, 2H), 2.79 (t,  $J = 8.0$  Hz, 2H), 3.66 (s, 3H), 3.86 (s, 3H), 6.70 (s, 1H), 6.81 (d,  $J = 8.8$  Hz, 1H), 7.24 (d,  $J = 8.8$  Hz, 1H);  $^{13}\text{C}$  NMR (100 MHz,  $\text{CDCl}_3$ )  $\delta$  14.3, 22.8, 27.3, 29.2, 29.6, 30.8, 31.8, 56.1, 57.4, 93.4, 109.8, 121.3, 124.5, 138.1, 140.9, 156.8; IR (neat,  $\text{cm}^{-1}$ ) 3378, 3057, 2925, 2853, 1453, 1433, 750; HRMS calcd for  $\text{C}_{16}\text{H}_{22}\text{INO}$  371.07462. Found 371.07537.

**2-(1-Cyclohexenyl)-3-iodo-6-methoxy-1-methylindole (44).** The product was obtained as a yellow oil:  $^1\text{H}$  NMR (400 MHz,  $\text{CDCl}_3$ )  $\delta$  1.72-1.75 (m, 2H), 1.79-1.82 (m, 2H), 2.22-2.26 (m, 4H), 3.61 (s, 3H), 3.86 (s, 3H), 5.87 (s, 1H), 6.70 (d,  $J = 2.0$  Hz, 1H), 6.82 (dd,  $J = 8.4, 2.0$  Hz, 1H), 7.27 (d,  $J = 8.8$  Hz, 1H);  $^{13}\text{C}$  NMR (100 MHz,  $\text{CDCl}_3$ )  $\delta$  22.1, 22.9, 25.7, 29.5, 31.5, 56.0, 56.5, 93.4, 110.1, 121.8, 124.6, 130.0, 133.7, 137.8, 143.5, 157.0; IR (neat,  $\text{cm}^{-1}$ ) 2925, 2855; HRMS calcd for  $\text{C}_{16}\text{H}_{18}\text{INO}$  367.06332. Found 367.06396.

**Ethyl 1-*n*-butyl-3-iodo-2-phenylindole-5-carboxylate (45).** The product was obtained as a yellow oil:  $^1\text{H}$  NMR (400 MHz,  $\text{CDCl}_3$ )  $\delta$  0.67 (t,  $J = 7.2$  Hz, 3H), 1.02-1.07 (m, 2H), 1.36 (t,  $J = 7.0$  Hz, 3H), 1.47-1.51 (m, 2H), 4.00 (t,  $J = 7.2$  Hz, 2H), 4.34 (t,  $J = 7.0$  Hz, 2H), 7.25 (d,  $J = 8.8$  Hz, 1H), 7.34-7.43 (m, 5H), 7.91 (d,  $J = 8.4$  Hz, 1H), 8.17 (s, 1H);  $^{13}\text{C}$  NMR (100 MHz,  $\text{CDCl}_3$ )  $\delta$  13.7, 14.7, 20.0, 32.2, 45.2, 60.9, 61.2, 110.1, 123.2, 124.2, 124.5, 128.7, 129.3, 130.3, 130.9,



131.7, 139.6, 143.3, 167.6; IR (neat,  $\text{cm}^{-1}$ ) 3058, 2959, 2932, 2872, 1709; HRMS calcd for  $\text{C}_{21}\text{H}_{22}\text{INO}_2$  447.06953. Found 447.07000.

**Ethyl 3-iodo-1-methyl-2-phenylindole-5-carboxylate (46).** The product was obtained as a pale yellow solid: mp 103-105 °C;  $^1\text{H}$  NMR (400 MHz,  $\text{CDCl}_3$ )  $\delta$  1.38 (t,  $J = 7.2$  Hz, 3H), 3.62 (s, 3H), 4.36 (q,  $J = 7.2$  Hz, 2H), 7.25 (d,  $J = 8.4$  Hz, 1H), 7.38-7.48 (m, 5H), 7.94 (d,  $J = 8.8$  Hz, 1H), 8.18 (s, 1H);  $^{13}\text{C}$  NMR (100 MHz,  $\text{CDCl}_3$ )  $\delta$  14.7, 32.4, 60.6, 61.0, 109.8, 123.3, 124.4, 124.5, 128.7, 129.3, 130.2, 131.0, 131.3, 140.5, 143.4, 167.6; IR (neat,  $\text{cm}^{-1}$ ) 2978, 2933, 1705; HRMS calcd for  $\text{C}_{18}\text{H}_{16}\text{INO}_2$  405.02258. Found 405.02306.

**Ethyl 1-*n*-butyl-2-*n*-hexyl-3-iodoindole-5-carboxylate (47).** The product was obtained as a yellow oil:  $^1\text{H}$  NMR (400 MHz,  $\text{CDCl}_3$ )  $\delta$  0.83-0.90 (m, 6H), 1.26-1.37 (m, 11H), 1.52-1.55 (m, 2H), 1.64-1.67 (m, 2H), 2.76 (t,  $J = 8.0$  Hz, 2H), 4.06 (t,  $J = 8.0$  Hz, 2H), 4.34 (q,  $J = 8.0$  Hz, 2H), 7.17 (d,  $J = 12.0$  Hz, 2H), 7.83 (d,  $J = 8.0$  Hz, 1H), 8.05 (s, 1H);  $^{13}\text{C}$  NMR (100 MHz,  $\text{CDCl}_3$ )  $\delta$  14.0, 14.3, 14.7, 20.5, 22.8, 27.4, 29.4, 29.6, 31.7, 32.7, 44.7, 59.8, 60.8, 109.4, 122.7, 123.4, 123.5, 130.0, 139.5, 143.2, 167.7; IR (neat,  $\text{cm}^{-1}$ ) 3378, 3057, 2925, 2853, 1453, 1433, 750; HRMS calcd for  $\text{C}_{21}\text{H}_{30}\text{INO}_2$  455.13213. Found 455.13262.

**Ethyl 2-*n*-hexyl-3-iodo-1-methylindole-5-carboxylate (48).** The product was obtained as a yellow oil:  $^1\text{H}$  NMR (400 MHz,  $\text{CDCl}_3$ )  $\delta$  0.83 (t,  $J = 6.0$  Hz, 3H), 1.25-1.26 (m, 4H), 1.34-1.38 (m, 5H), 1.53 (q,  $J = 8.0$  Hz, 2H), 2.78 (t,  $J = 8.0$  Hz, 2H), 3.70 (s, 3H), 4.34 (q,  $J = 8.0$  Hz, 2H), 7.17 (t,  $J = 8.8$  Hz, 1H), 7.85 (d,  $J = 8.0$  Hz, 1H), 8.05 (s, 1H);  $^{13}\text{C}$  NMR (100 MHz,  $\text{CDCl}_3$ )  $\delta$  14.3, 14.7, 22.8, 27.4, 29.2, 29.4, 31.1, 31.8, 59.5, 60.9, 109.1, 122.8, 123.5, 123.6, 129.9, 140.3,

143.7, 167.7; IR (neat,  $\text{cm}^{-1}$ ) 3378, 3057, 2925, 2853, 1453, 1433, 750; HRMS calcd for  $\text{C}_{18}\text{H}_{24}\text{INO}_2$  413.08518. Found 413.08573.

**Ethyl 1-*n*-butyl-2-(cyclohex-1-enyl)-3-iodoindole-5-carboxylate (49).** The product was obtained as a yellow oil:  $^1\text{H}$  NMR (400 MHz,  $\text{CDCl}_3$ )  $\delta$  0.85 (t,  $J = 8.0$  Hz, 3H), 1.21-1.27 (m, 2H), 1.35 (t,  $J = 8.0$  Hz, 3H), 1.58-1.75 (m, 6H), 2.18-2.19 (m, 4H), 4.00 (q,  $J = 8.0$  Hz, 2H), 4.33 (q,  $J = 8.0$  Hz, 2H), 5.83 (m, 1H), 7.18 (d,  $J = 12.0$  Hz, 1H), 7.84 (d,  $J = 8.0$  Hz, 1H), 8.08 (s, 1H);  $^{13}\text{C}$  NMR (100 MHz,  $\text{CDCl}_3$ )  $\delta$  13.9, 14.7, 20.3, 22.0, 22.9, 25.7, 29.6, 32.6, 45.1, 59.0, 60.8, 109.8, 122.7, 123.7, 124.0, 129.8, 130.1, 134.2, 139.2, 145.6, 167.7; IR (neat,  $\text{cm}^{-1}$ ) 3378, 3057, 2925, 2853, 1453, 1433, 750; HRMS calcd for  $\text{C}_{21}\text{H}_{26}\text{INO}_2$  451.10083. Found 451.10169.

**Ethyl 2-(cyclohex-1-enyl)-3-iodo-1-methylindole-5-carboxylate (50).** The product was obtained as a pale yellow solid: mp. 121-122  $^\circ\text{C}$ ;  $^1\text{H}$  NMR (400 MHz,  $\text{CDCl}_3$ )  $\delta$  1.36 (t,  $J = 8.0$  Hz, 3H), 1.68-1.77 (m, 4H), 2.17-2.22 (m, 4H), 3.64 (s, 3H), 4.34 (q,  $J = 8.0$  Hz, 2H), 5.85 (m, 1H), 7.17 (d,  $J = 8.0$  Hz, 1H), 7.87 (d,  $J = 8.0$  Hz, 1H), 8.09 (s, 1H);  $^{13}\text{C}$  NMR (100 MHz,  $\text{CDCl}_3$ )  $\delta$  13.7, 14.7, 20.0, 32.2, 45.2, 60.9, 61.2, 110.1, 123.2, 124.2, 124.5, 128.7, 134.2, 139.6, 139.6, 143.3, 167.6; IR (neat,  $\text{cm}^{-1}$ ) 3378, 3057, 2925, 2853, 1453, 1433, 750; HRMS calcd for  $\text{C}_{18}\text{H}_{20}\text{INO}_2$  409.05388. Found 409.05434.

**Methyl 3-iodo-1,2-diphenylindole-5-carboxylate (52).** The product was obtained as a colorless solid: mp 185-186  $^\circ\text{C}$ ;  $^1\text{H}$  NMR (300 MHz,  $\text{CDCl}_3$ )  $\delta$  3.97 (s, 3H), 7.14-7.18 (m, 2H), 7.21-7.26 (m, 1H), 7.30-7.38 (m, 8H), 7.94 (dd,  $J = 8.7, 1.8$  Hz, 1H), 8.33 (d,  $J = 1.2$  Hz, 1H);  $^{13}\text{C}$  NMR (75 MHz,  $\text{CDCl}_3$ )  $\delta$  52.3, 63.4, 111.0, 123.8, 124.8, 125.1, 128.1, 128.2, 128.3, 128.8, 129.6, 130.7, 131.16,

131.19, 137.8, 141.0, 142.7, 167.9; IR (neat,  $\text{cm}^{-1}$ ) 3057, 2949, 2849, 1712, 1596; HRMS  $m/z$  calcd for  $\text{C}_{22}\text{H}_{16}\text{INO}_2$ : 453.0226. Found: 453.0233.

**1-Methyl-2-phenyl-3-(phenylethynyl)indole (53).** This indole was prepared by the following procedure. Into a well mixed  $\text{Et}_3\text{N}$  solution (5 ml) containing 5.0 mmol of 3-iodo-1-methyl-2-phenylindole, 6.0 mmol of phenylacetylene and  $\text{PdCl}_2(\text{PPh}_3)_2$  (5 mol %),  $\text{CuI}$  (2.5 mol %) was added and the flask was flushed with Ar, sealed and allowed to stir at room temperature for 2 h. The resulting precipitate was filtered off and washed with ethyl ether (10 ml). The combined ether layers were dried over anhydrous  $\text{Na}_2\text{SO}_4$  and concentrated under vacuum to afford a yellow oil:  $^1\text{H}$  NMR (300 MHz,  $\text{CDCl}_3$ )  $\delta$  3.69 (s, 3H), 7.21-7.32 (m, 6H), 7.41-7.44 (m, 3H), 7.49 (t,  $J = 7.2$  Hz, 2H), 7.65 (dd,  $J = 10.8, 2.0$  Hz, 2H), 7.85 (dd,  $J = 10.4, 2.0$  Hz, 1H);  $^{13}\text{C}$  NMR (75 MHz,  $\text{CDCl}_3$ )  $\delta$  31.8, 84.5, 91.9, 110.0, 120.2, 121.0, 123.1, 124.7, 127.4, 128.1, 128.4, 128.5, 128.7, 129.0, 130.4, 131.0, 131.3, 137.4, 144.0; IR (neat,  $\text{cm}^{-1}$ ) 3004, 2962, 2923, 2204; HRMS calcd for  $\text{C}_{23}\text{H}_{17}\text{N}$  307.13610. Found 307.13698.

**1-Methyl-2,3-diphenylindole (54).** This indole was prepared according to a literature procedure.<sup>7</sup> Into 10 ml of a 2:1 DMF/ $\text{H}_2\text{O}$  solution containing 5.0 mmol of 3-iodo-1-methyl-2-phenylindole, 5.0 mmol of  $\text{Na}_2\text{CO}_3$  and 1.25 mmol of  $\text{NaBPh}_4$  were added and the reaction mixture was stirred for 2 min.  $\text{Pd}(\text{OAc})_2$  (5 mol %) was then added and the flask was flushed with Ar, sealed and allowed to stir at 100 °C for 2 h. The resulting reaction mixture was extracted with ethyl ether (2 x 10 ml). The combined ether layers were dried over anhydrous  $\text{Na}_2\text{SO}_4$  and concentrated under vacuum to afford a white solid. Recrystallization afforded a 92 % yield of a crystalline solid. The product was obtained as white

needles: mp 113-114 °C; <sup>1</sup>H NMR (300 MHz, CDCl<sub>3</sub>) δ 3.67 (s, 3H), 7.16-7.39 (m, 13H), 7.80 (d, *J* = 10.6 Hz, 1H); <sup>13</sup>C NMR (75 MHz, CDCl<sub>3</sub>) δ 31.1, 109.8, 115.3, 119.8, 120.4, 122.4, 125.7, 127.2, 128.2, 128.4, 128.6, 130.1, 131.4, 132.1, 135.4, 137.5, 137.9; IR (neat, cm<sup>-1</sup>) 3058, 2923, 2849; HRMS calcd for C<sub>21</sub>H<sub>17</sub>N 283.13610. Found 283.13690.

***n*-Butyl (*E*)-3-[1-methyl-2-phenylindol-3-yl]propenoate (55).** This indole was prepared by the following procedure. Into 1 ml of DMF containing 0.25 mmol of 3-iodo-1-methyl-2-phenylindole, 0.25 mmol of Na<sub>2</sub>CO<sub>3</sub>, 0.25 mmol of *n*-Bu<sub>4</sub>NCl and 0.525 mmol of *n*-butyl acrylate were added and the reaction mixture was stirred for 2 min. Pd(OAc)<sub>2</sub> (5 mol %) was then added and the flask was flushed with Ar, sealed and allowed to stir at 80 °C for 24 h.<sup>8</sup> The resulting reaction mixture was extracted with ethyl ether (2 x 10 ml). The combined ether layers were dried over anhydrous Na<sub>2</sub>SO<sub>4</sub> and concentrated under vacuum to afford a pale yellow oil: <sup>1</sup>H NMR (300 MHz, CDCl<sub>3</sub>) δ 0.94 (t, *J* = 7.5 Hz, 3H), 1.37-1.44 (m, 2H), 1.62-1.67 (m, 2H), 3.61 (s, 3H), 4.15 (t, *J* = 6.6 Hz, 2H), 6.48 (d, *J* = 15.9 Hz, 1H), 7.32-7.40 (m, 5H), 7.50-7.53 (m, 3H), 7.72 (d, *J* = 16.2 Hz, 1H), 8.01 (d, *J* = 7.8 Hz, 1H); <sup>13</sup>C NMR (75 MHz, CDCl<sub>3</sub>) δ 14.0, 19.4, 31.1, 31.3, 64.0, 110.2, 110.6, 113.1, 120.9, 121.9, 123.2, 125.8, 128.8, 129.4, 130.2, 131.1, 138.1, 139.0, 145.6, 168.8; IR (neat, cm<sup>-1</sup>) 3004, 2963, 2925, 1711; HRMS calcd for C<sub>22</sub>H<sub>23</sub>NO<sub>2</sub> 333.17288. Found 333.17370.

## References

- (1) Ma, C.; Liu, X.; Li, X.; Flippen-Anderson, J.; Yu, S.; Cook, J. M. *J. Org. Chem.* **2001**, *66*, 4525.
- (2) Hill, M. L.; Raphael, R. A. *Tetrahedron* **1990**, *46*, 4587.

- (3) Larock, R. C.; Yum, E. K.; Refvik, M. D. *J. Org. Chem.* **1998**, *63*, 7652.
- (4) Cadogan, J. T. G.; Hickson, C. L.; Husband, J. B.; McNab, H. *J. Chem. Soc., Perkin Trans. 1* **1985**, 1891.
- (5) Liu, Z.; Larock, R. C. *Org. Lett.* **2003**, *5*, 4673.
- (6) Bumagin, N.; Bykov, V. V. *Tetrahedron* **1997**, *53*, 14437.
- (7) Fuerstner, A.; Hupperts, A.; Ptock, A.; Janssen, E. *J. Org. Chem.* **1994**, *59*, 5215.
- (8) Jeffery, T. *J. Chem. Soc., Chem. Commun.* **1984**, *19*, 1287.

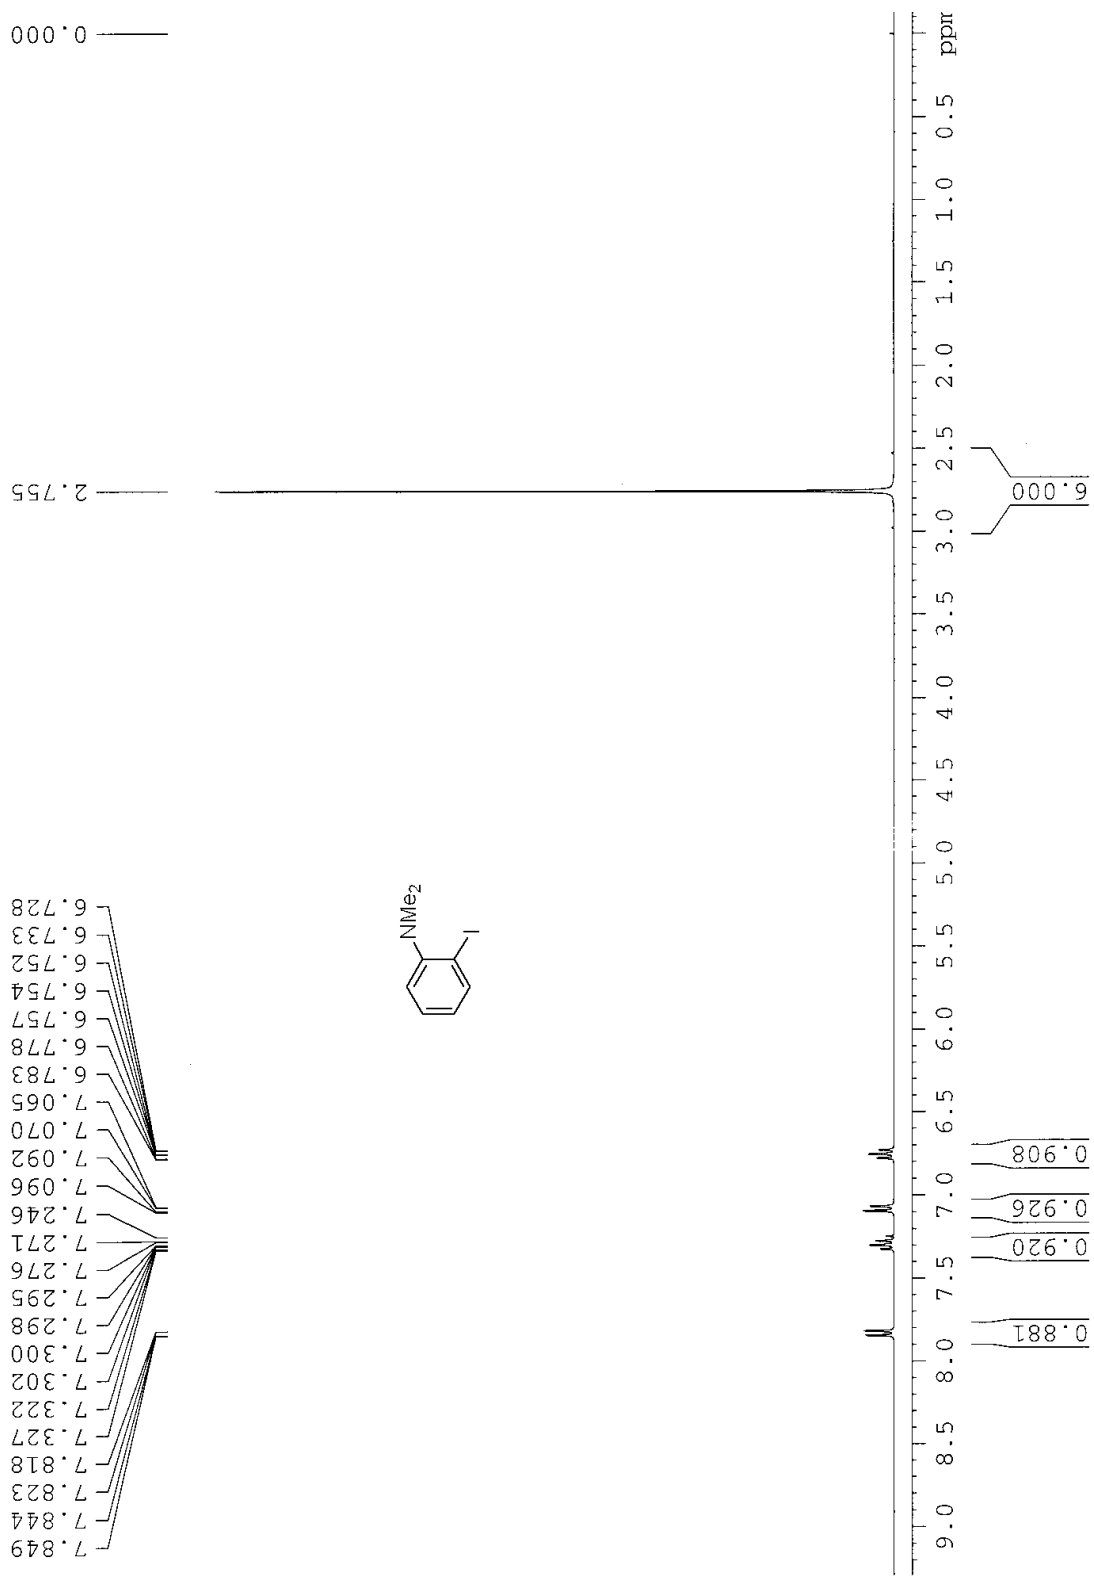

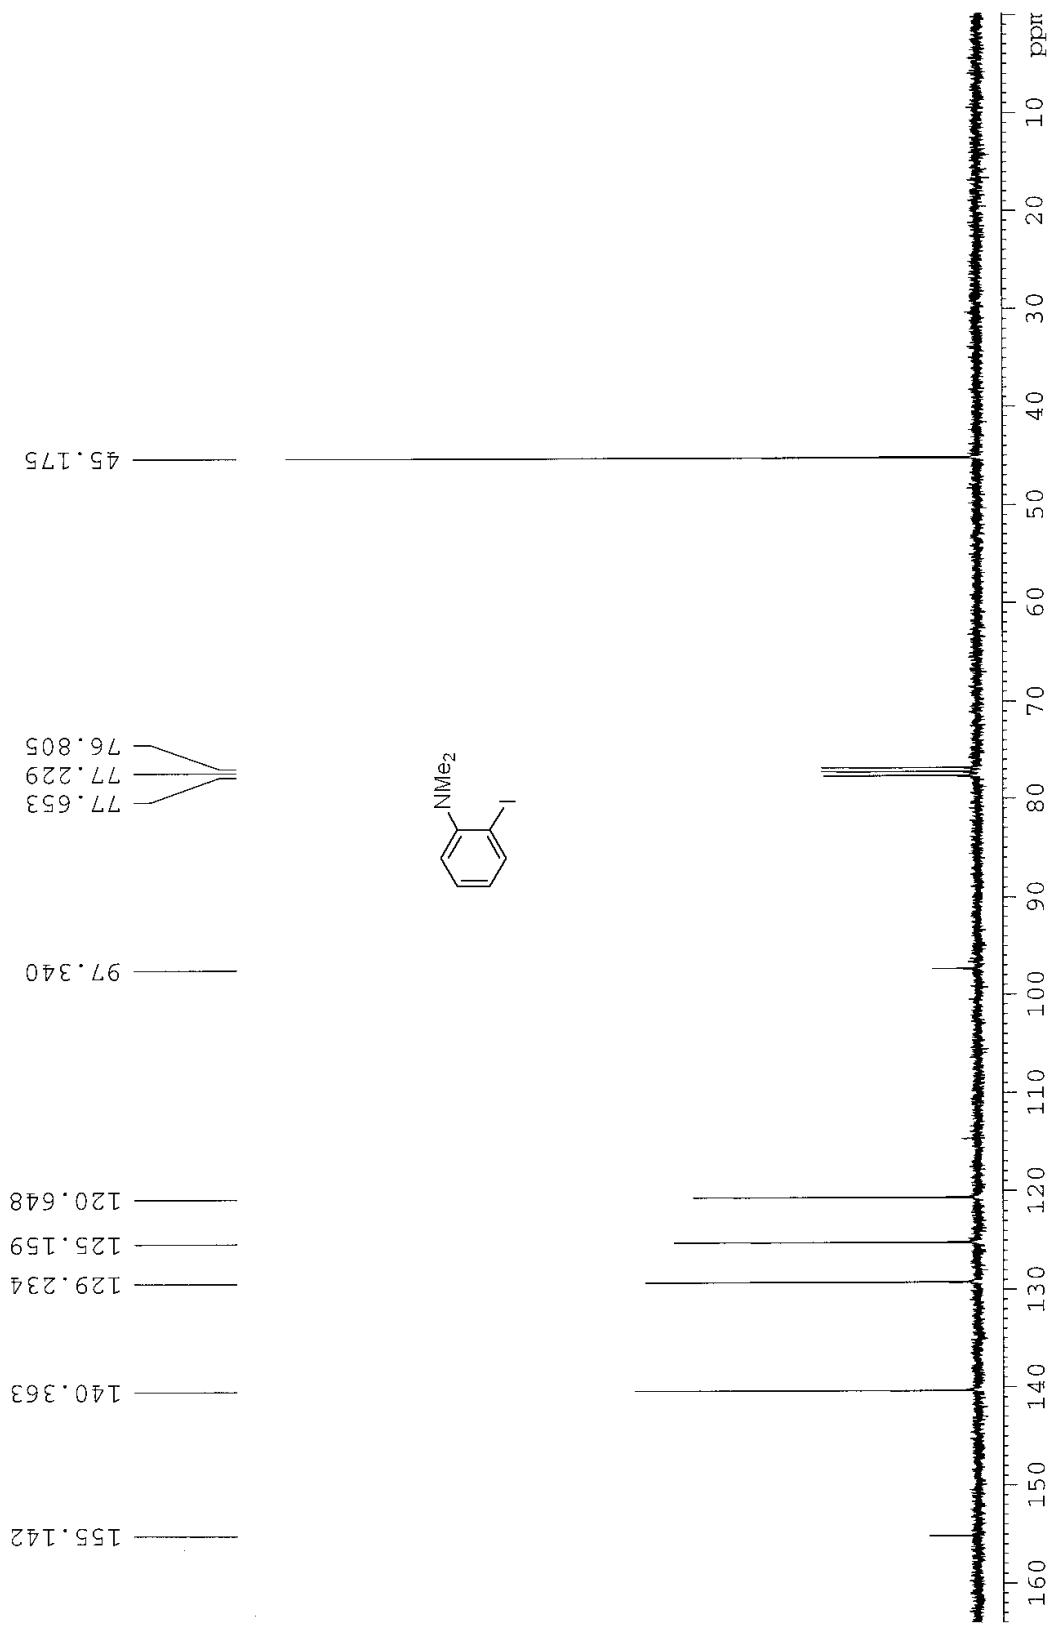

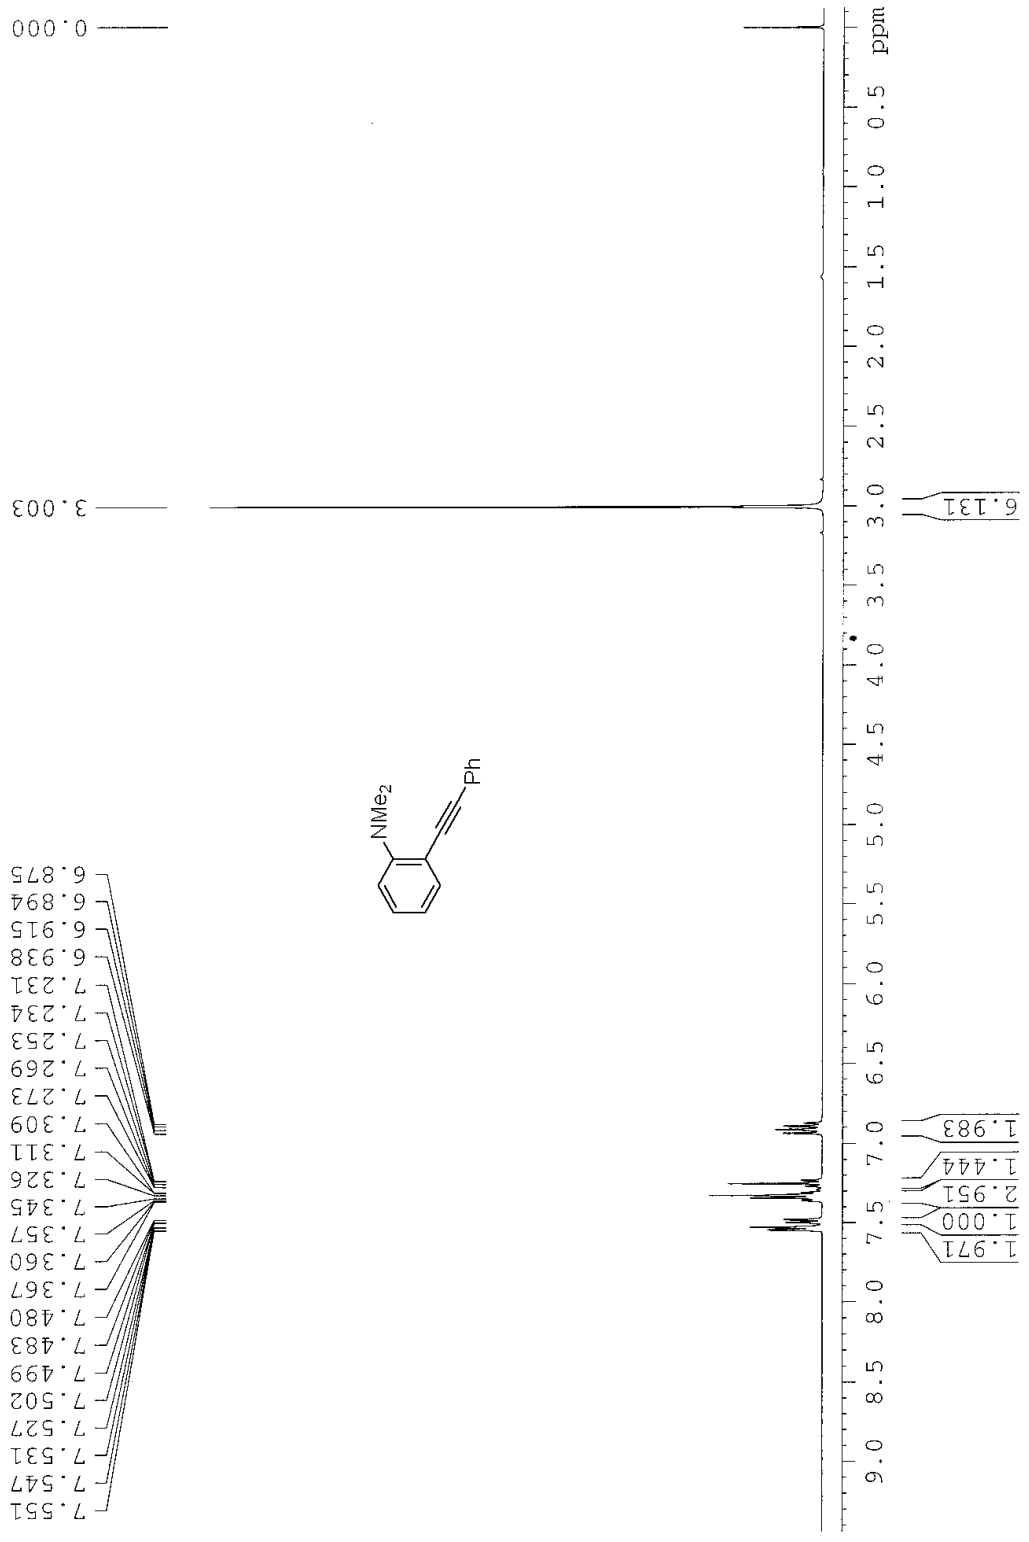

data/nmr400/dwy110



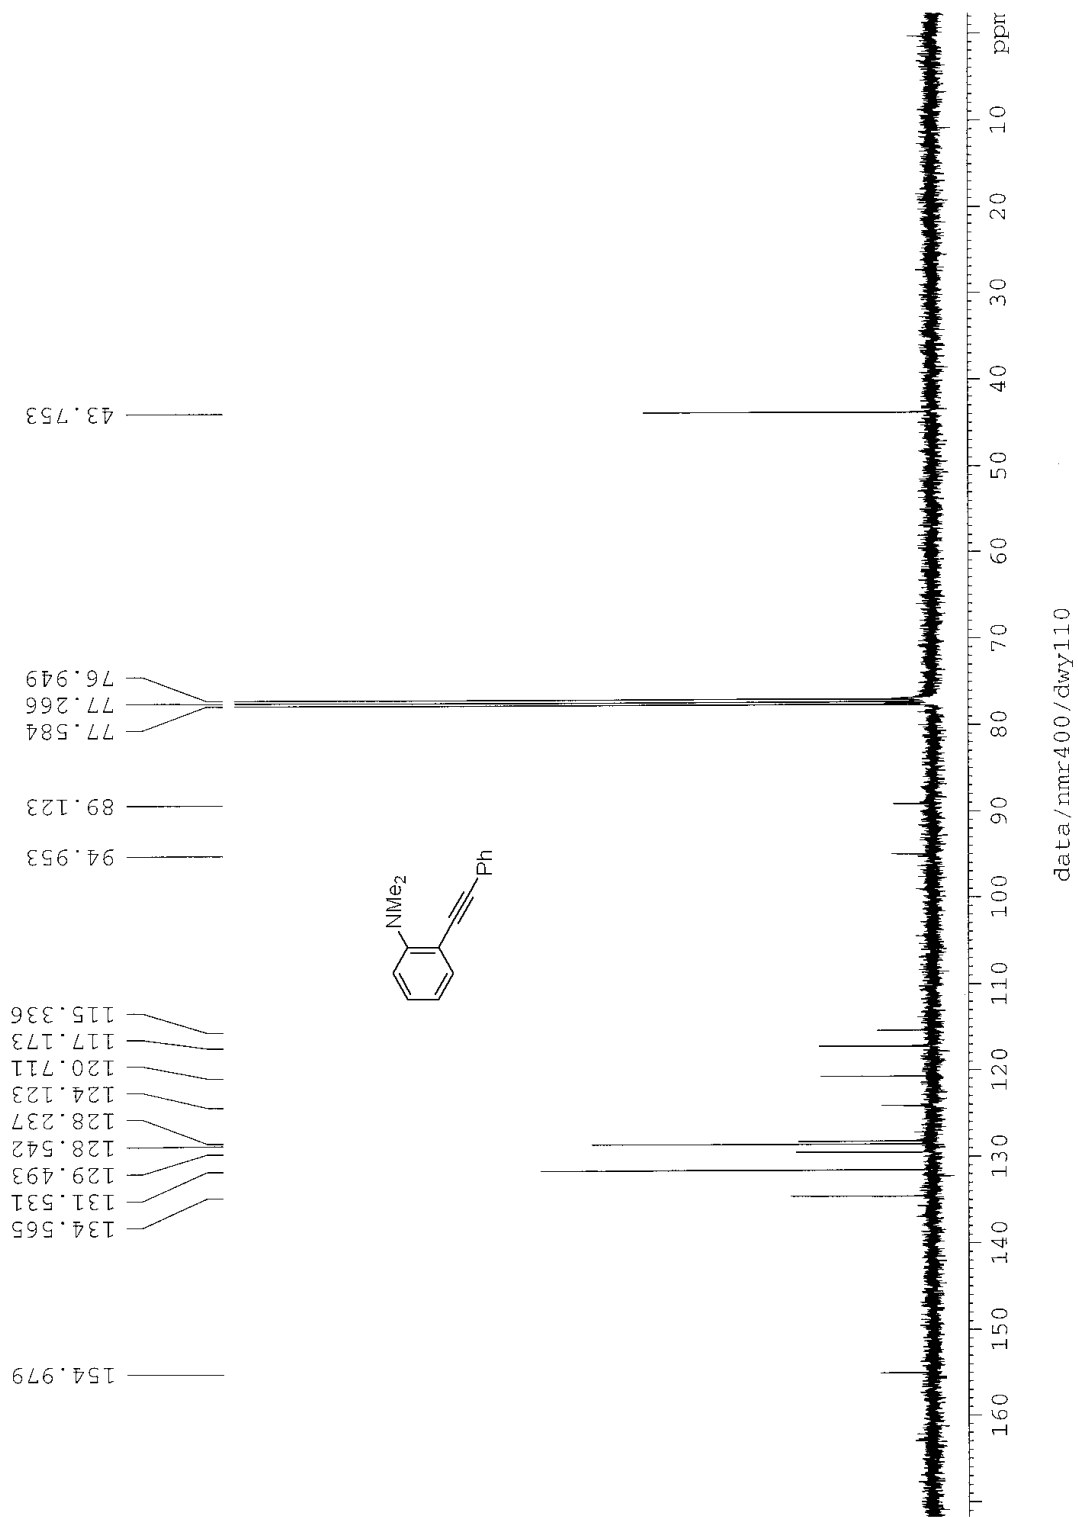

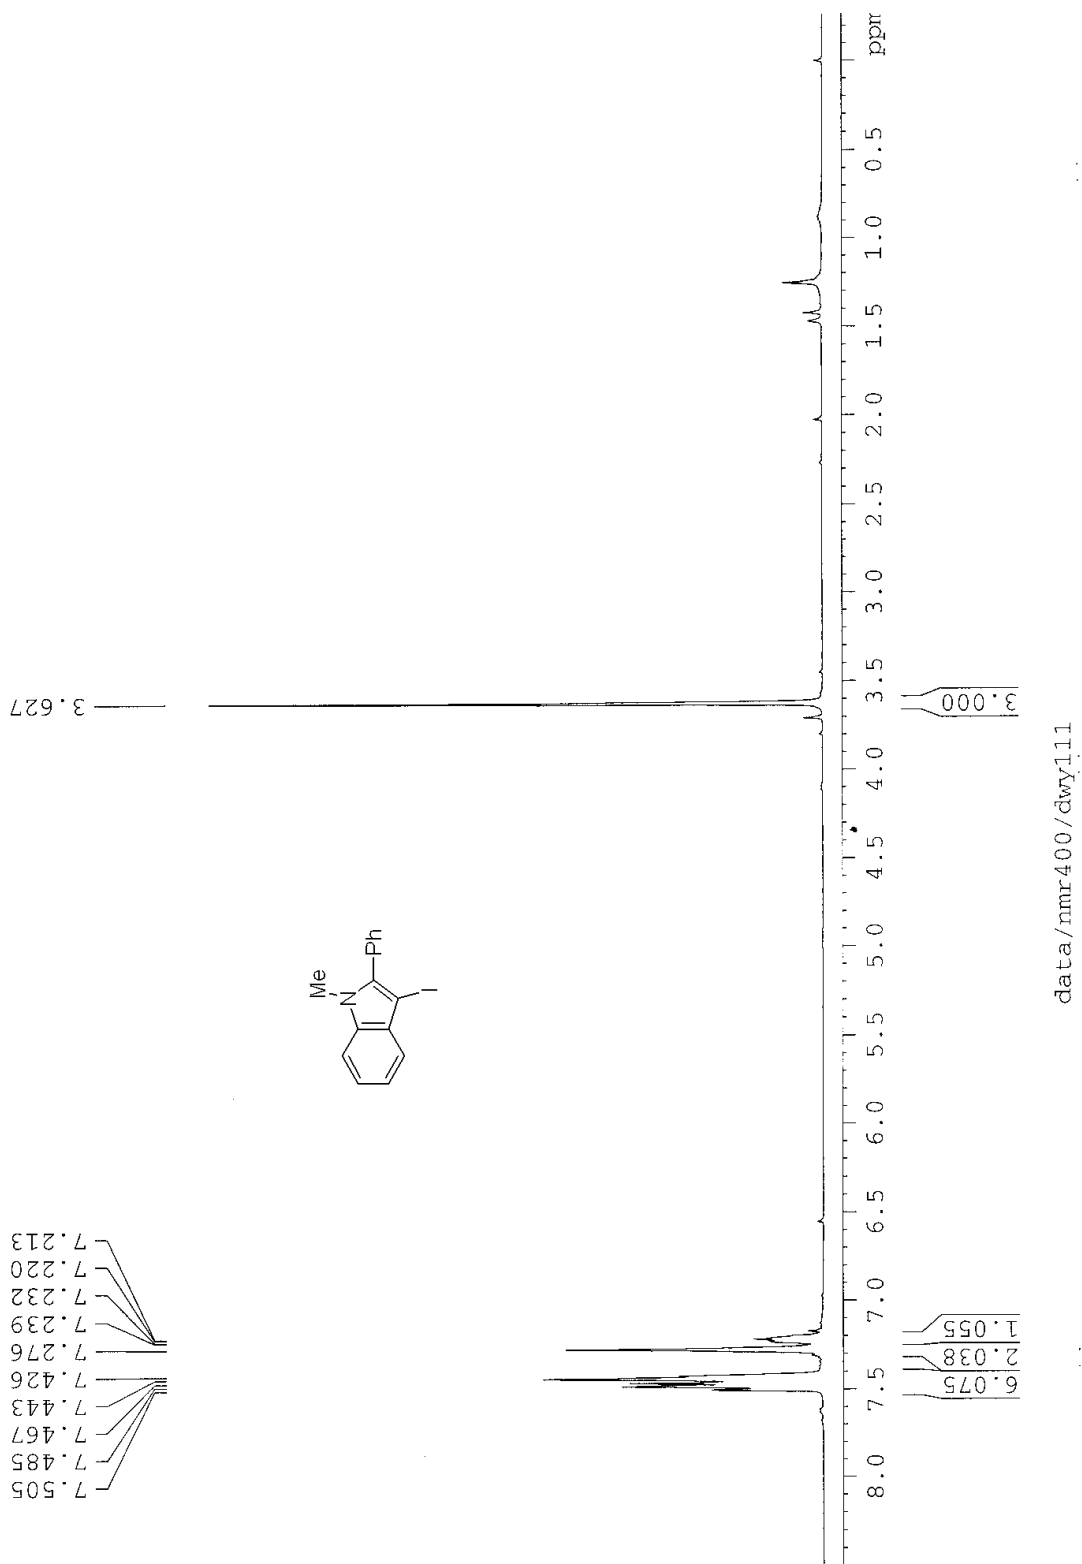

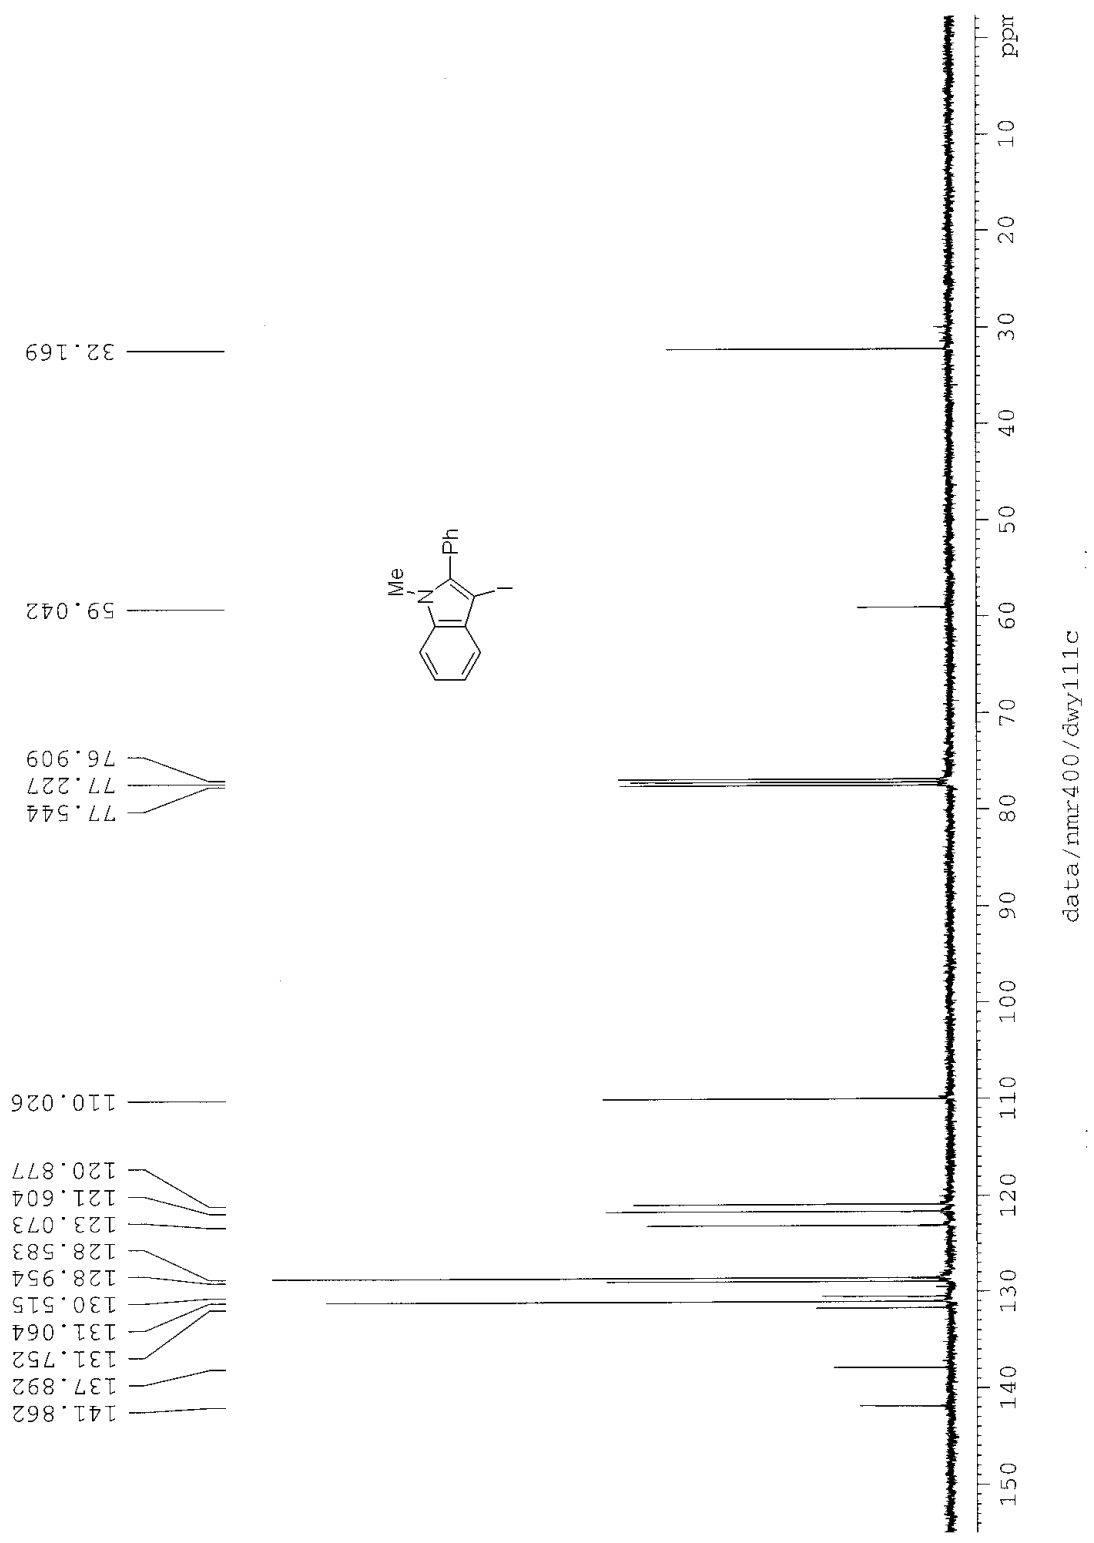

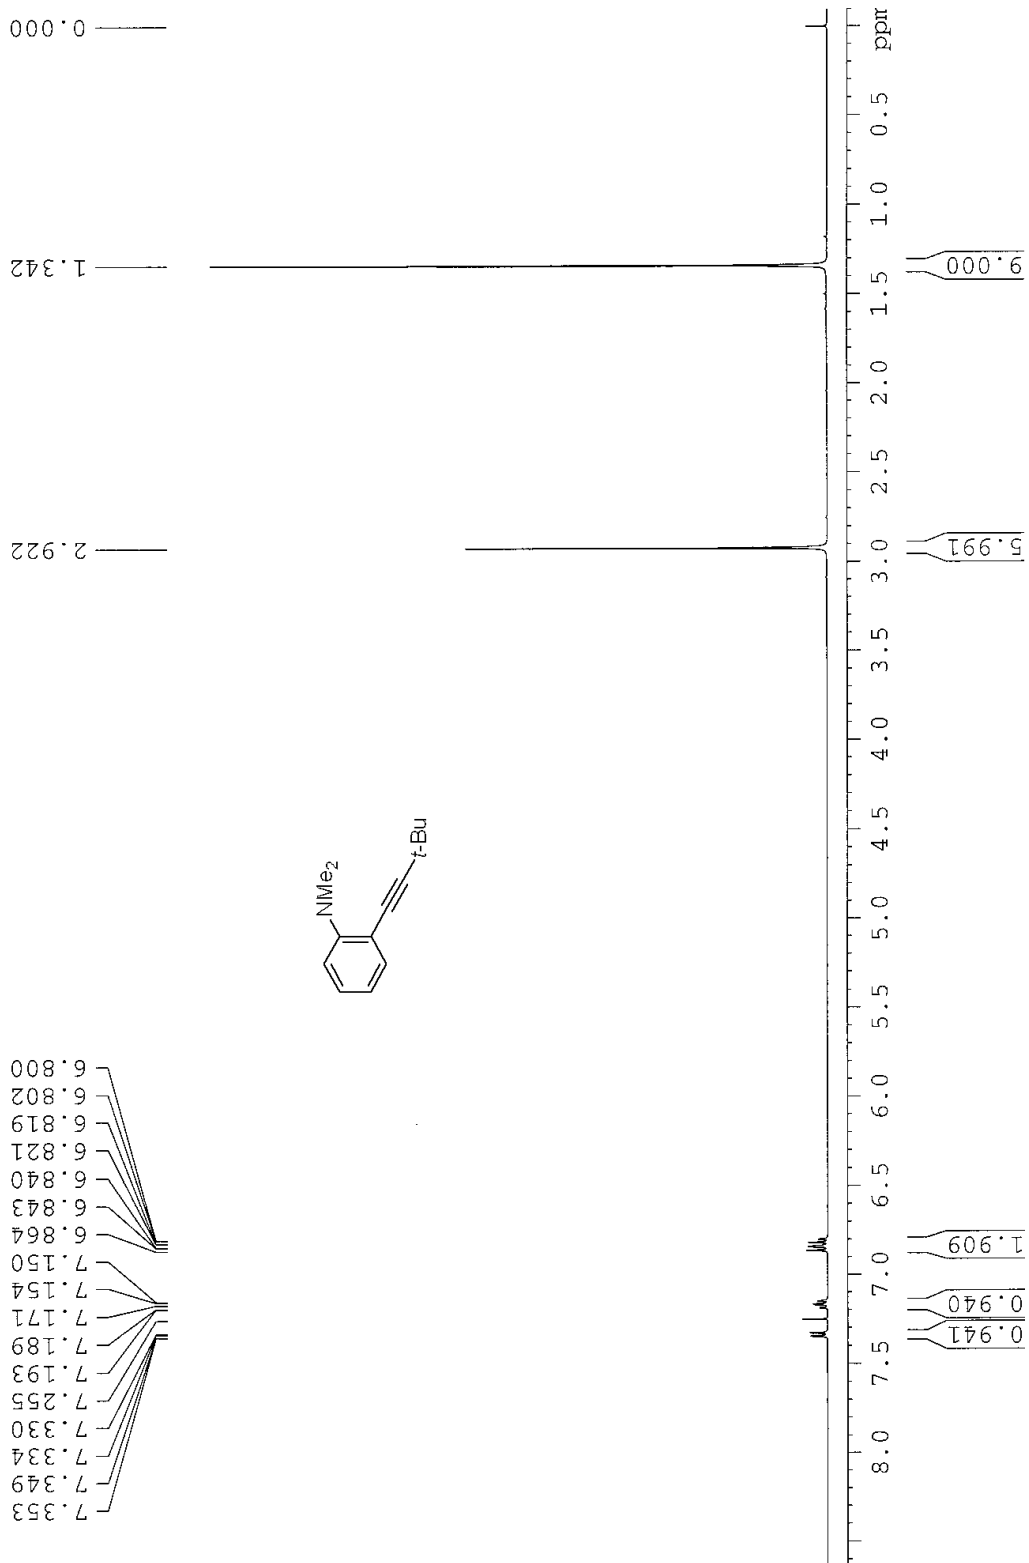

data/nmr400/dwry115

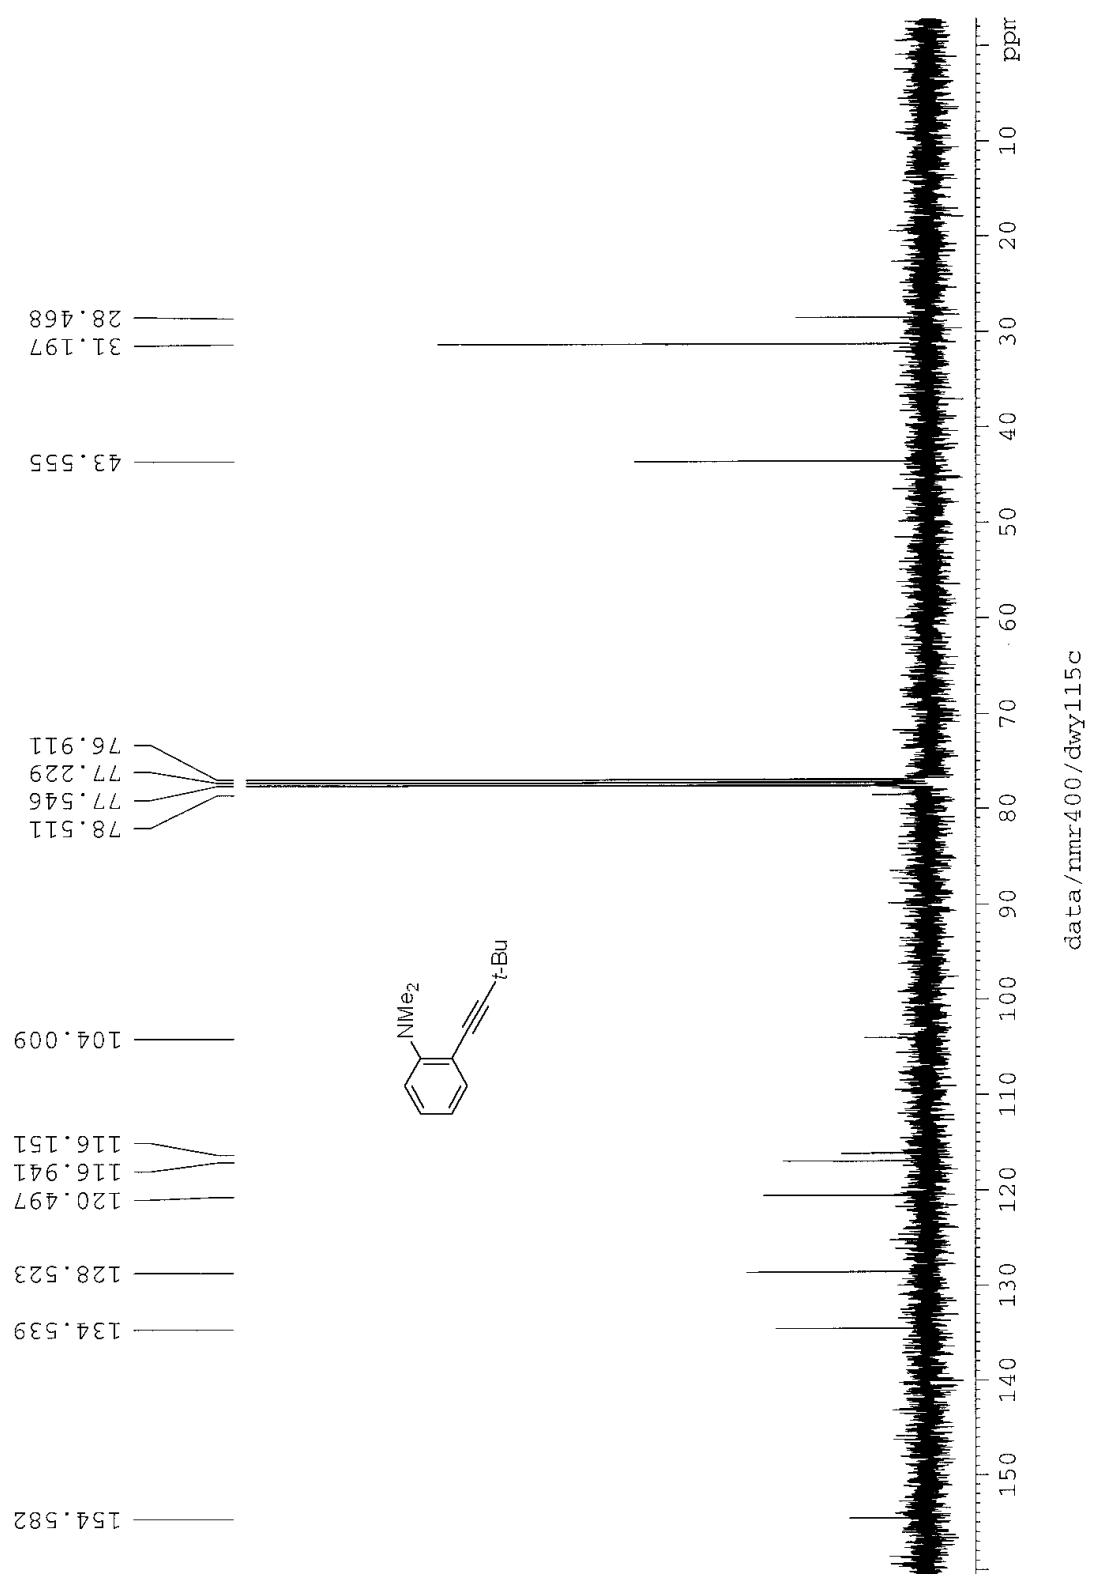

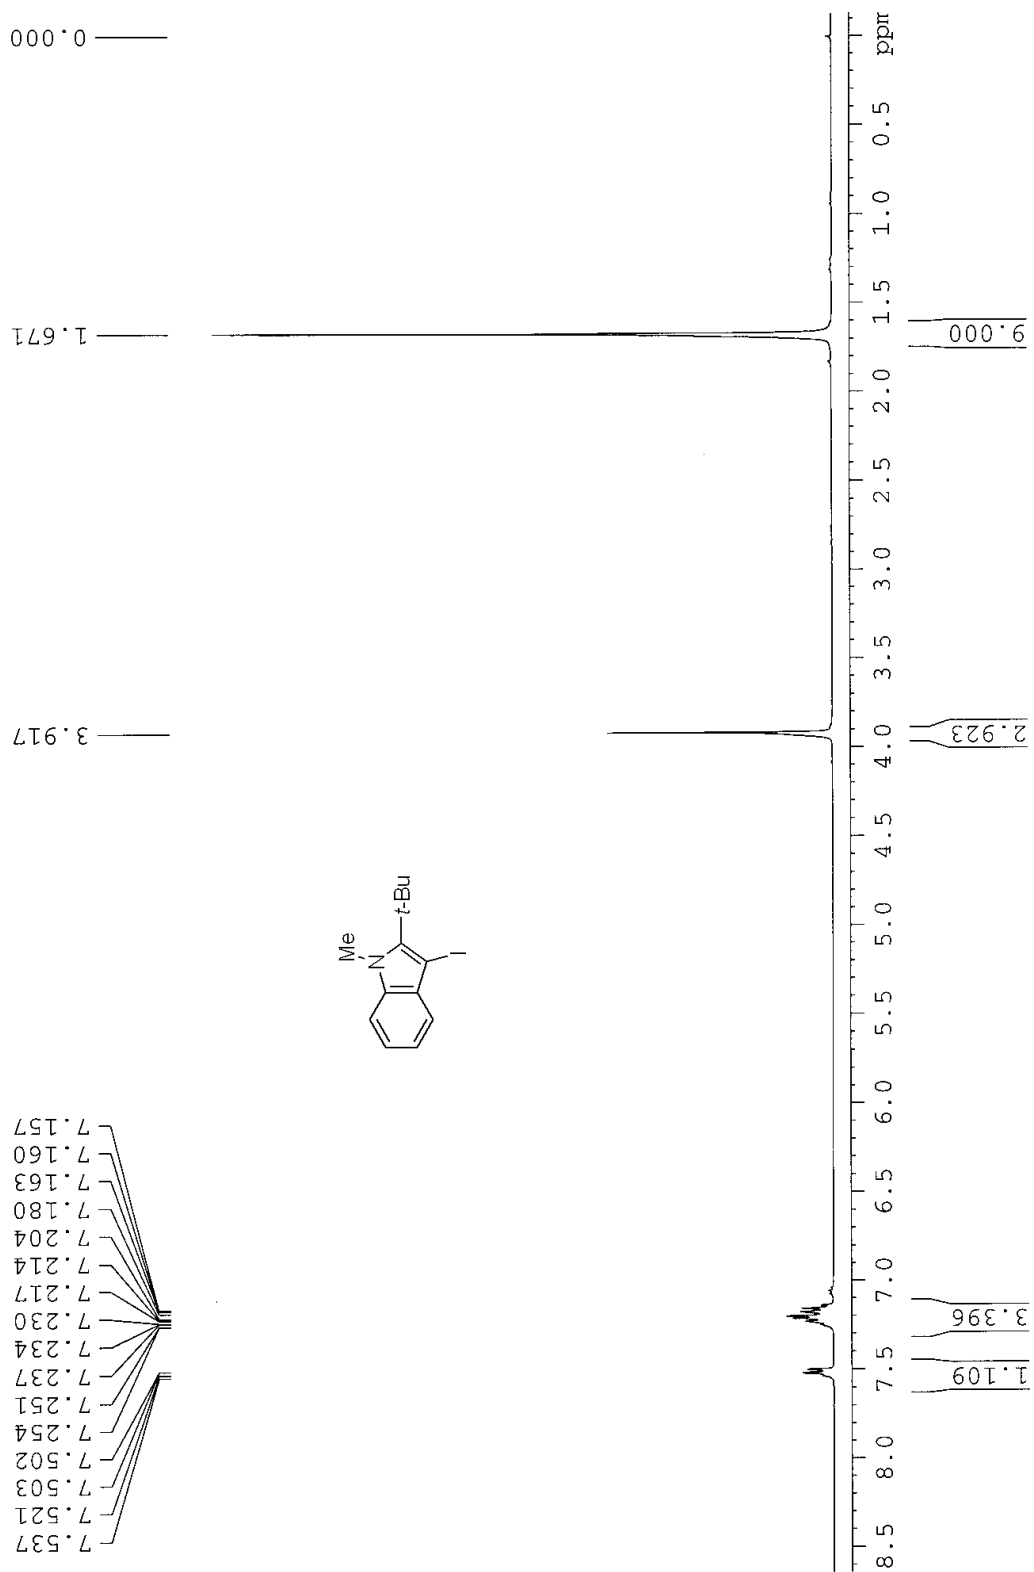

data/nmr400/dwy118

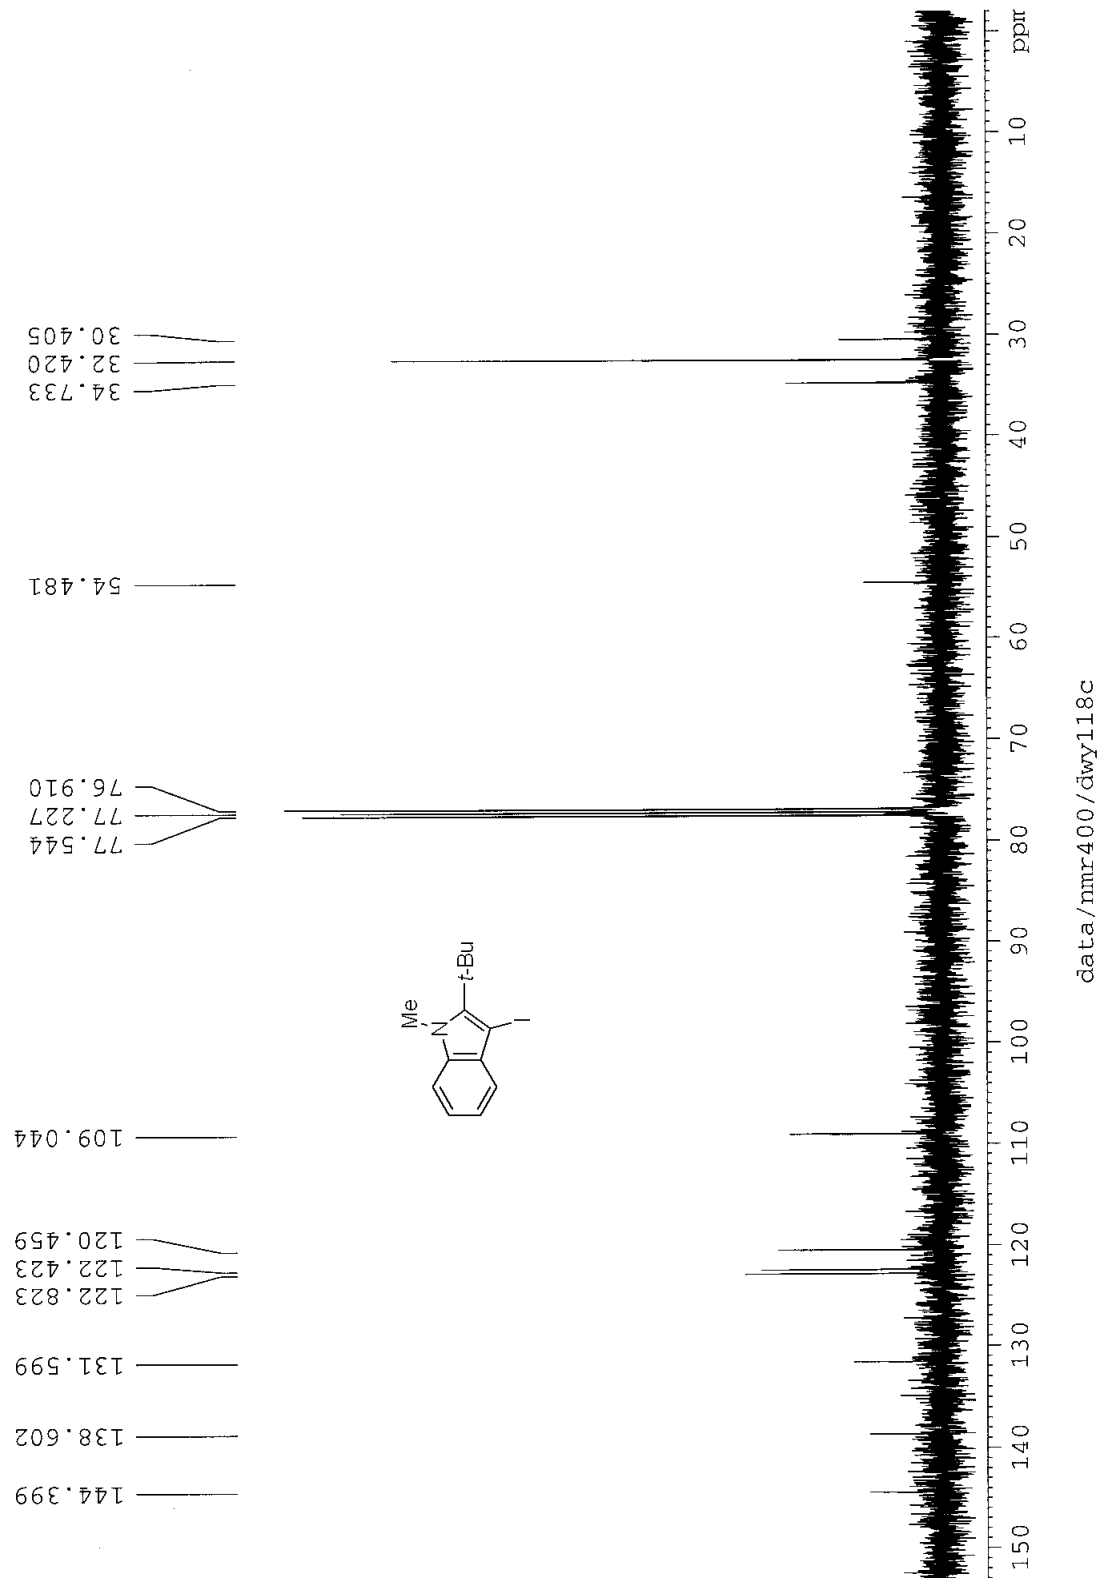

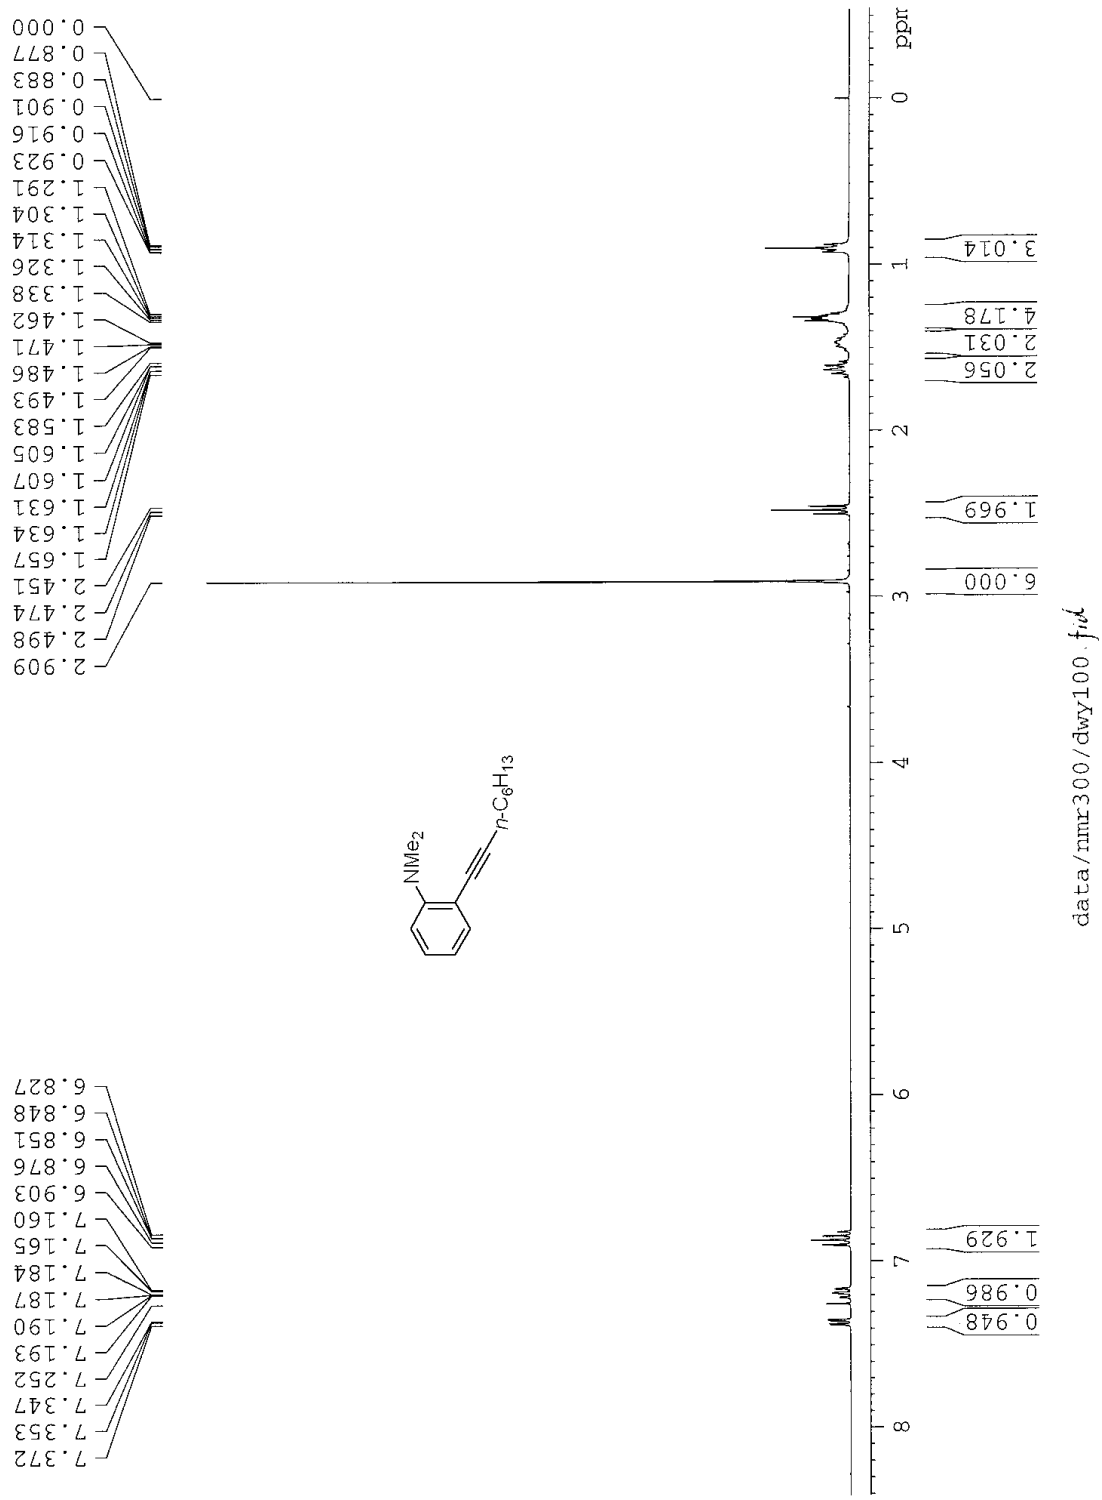



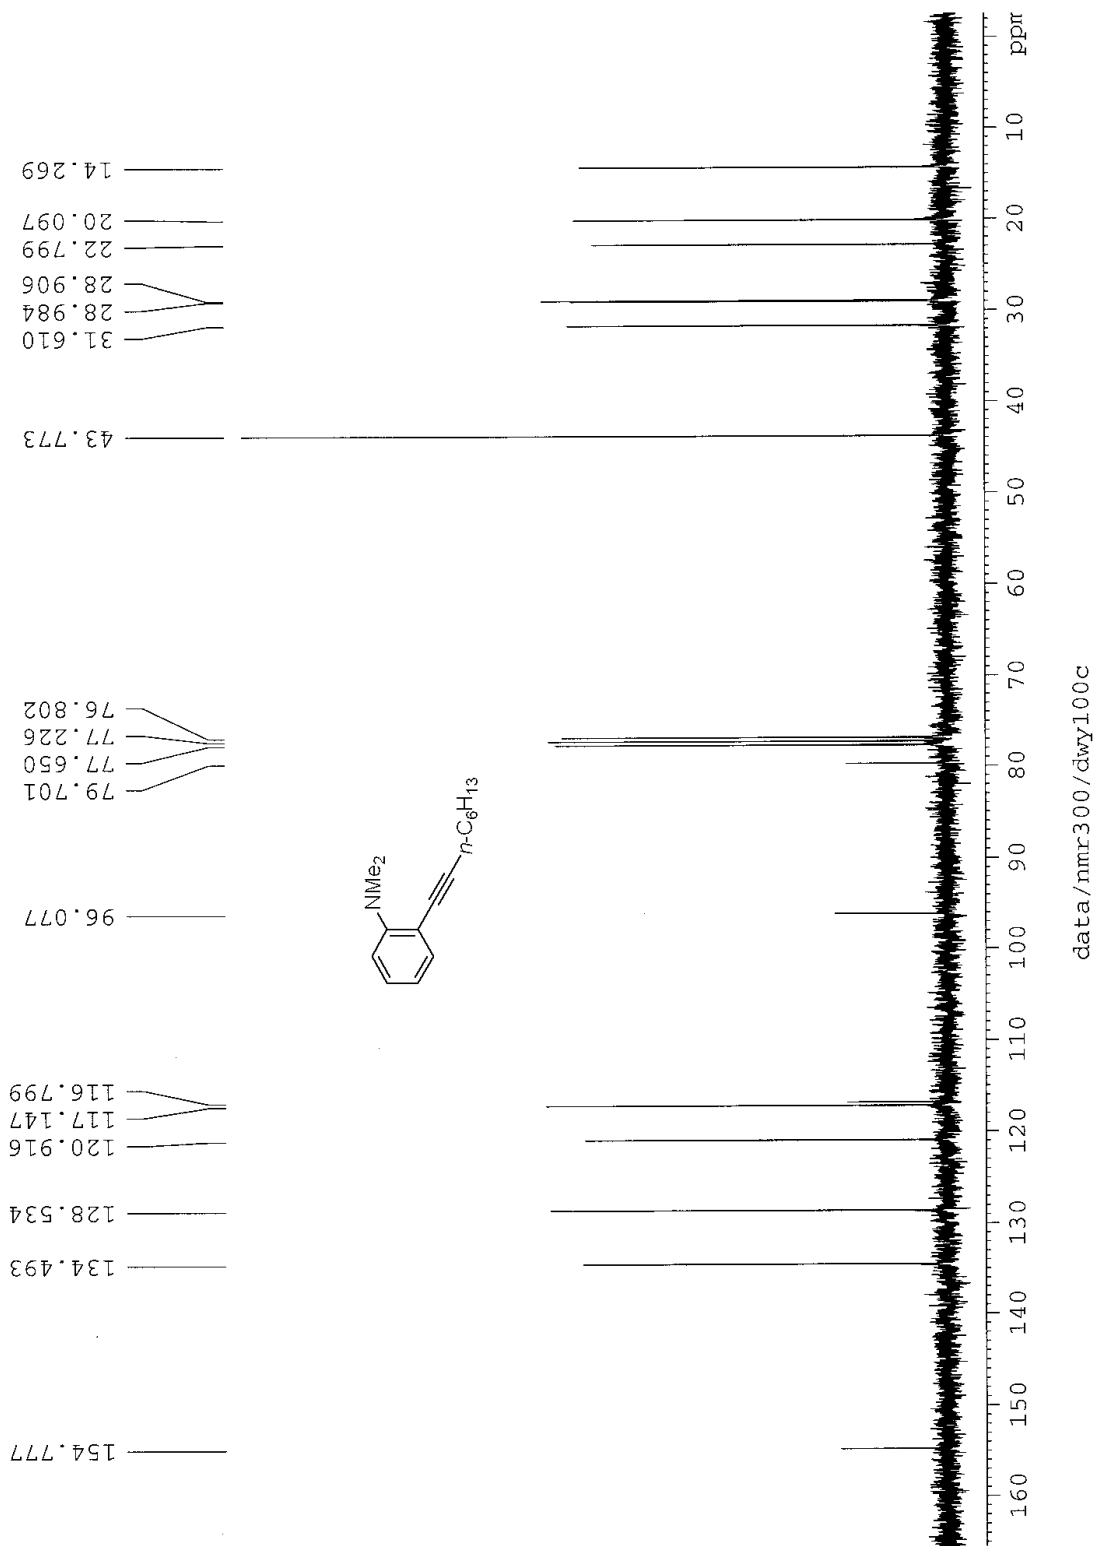

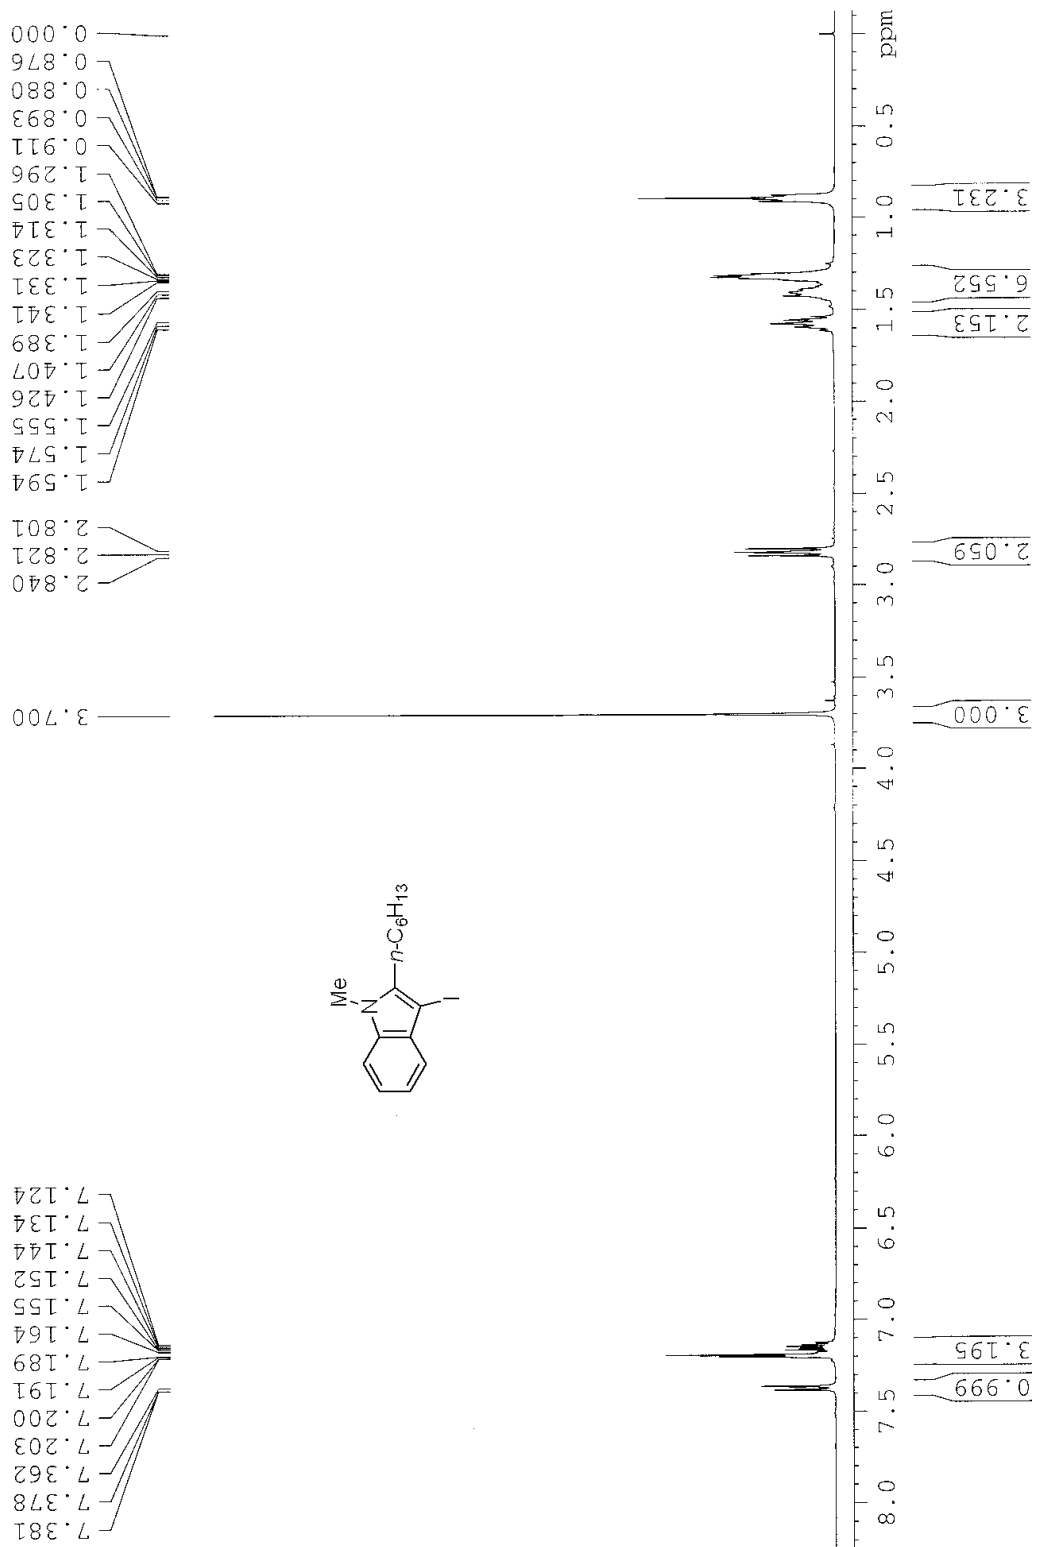

data/nmr400/dwy112

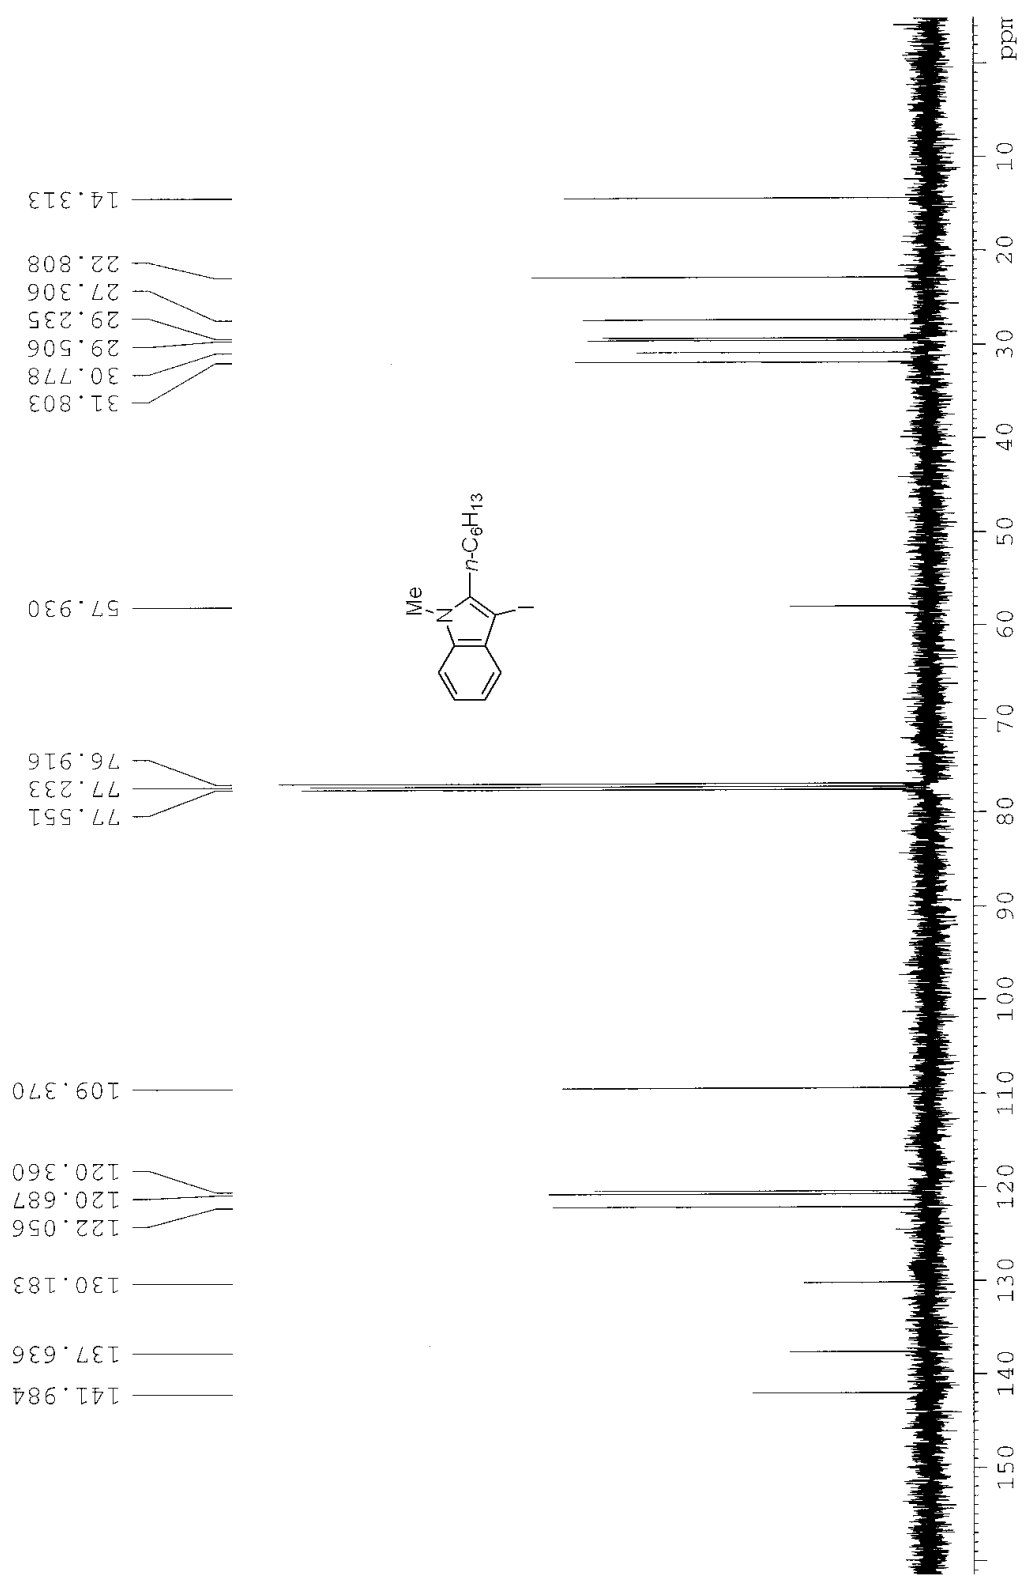

data/rmr400/dwy112c

0.000  
 1.617  
 1.624  
 1.638  
 1.643  
 1.658  
 1.664  
 1.684  
 1.684  
 2.129  
 2.138  
 2.142  
 2.151  
 2.246  
 2.254  
 2.266  
 2.926

6.175  
 6.182  
 6.189  
 6.835  
 6.839  
 6.860  
 6.863  
 6.885  
 6.885  
 7.155  
 7.161  
 7.179  
 7.183  
 7.185  
 7.352  
 7.358  
 7.378  
 7.383

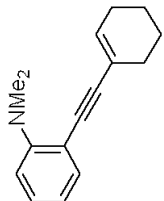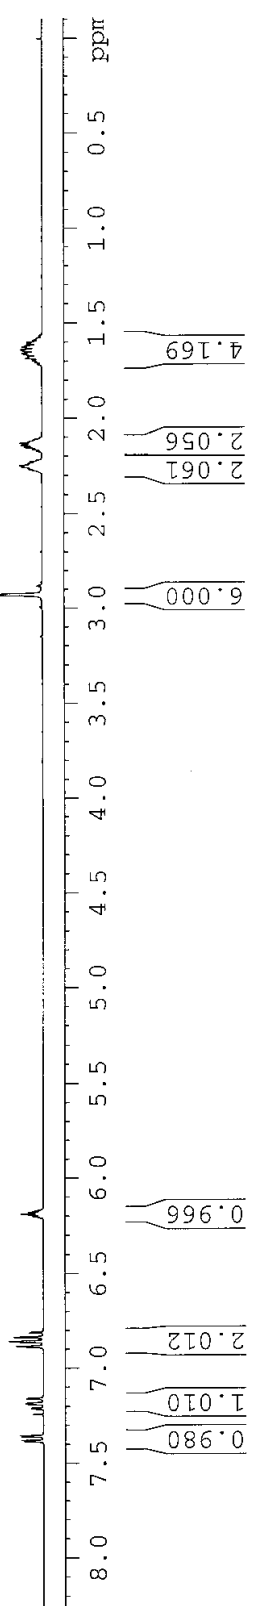

data/nmr300/dwy123-1.fid

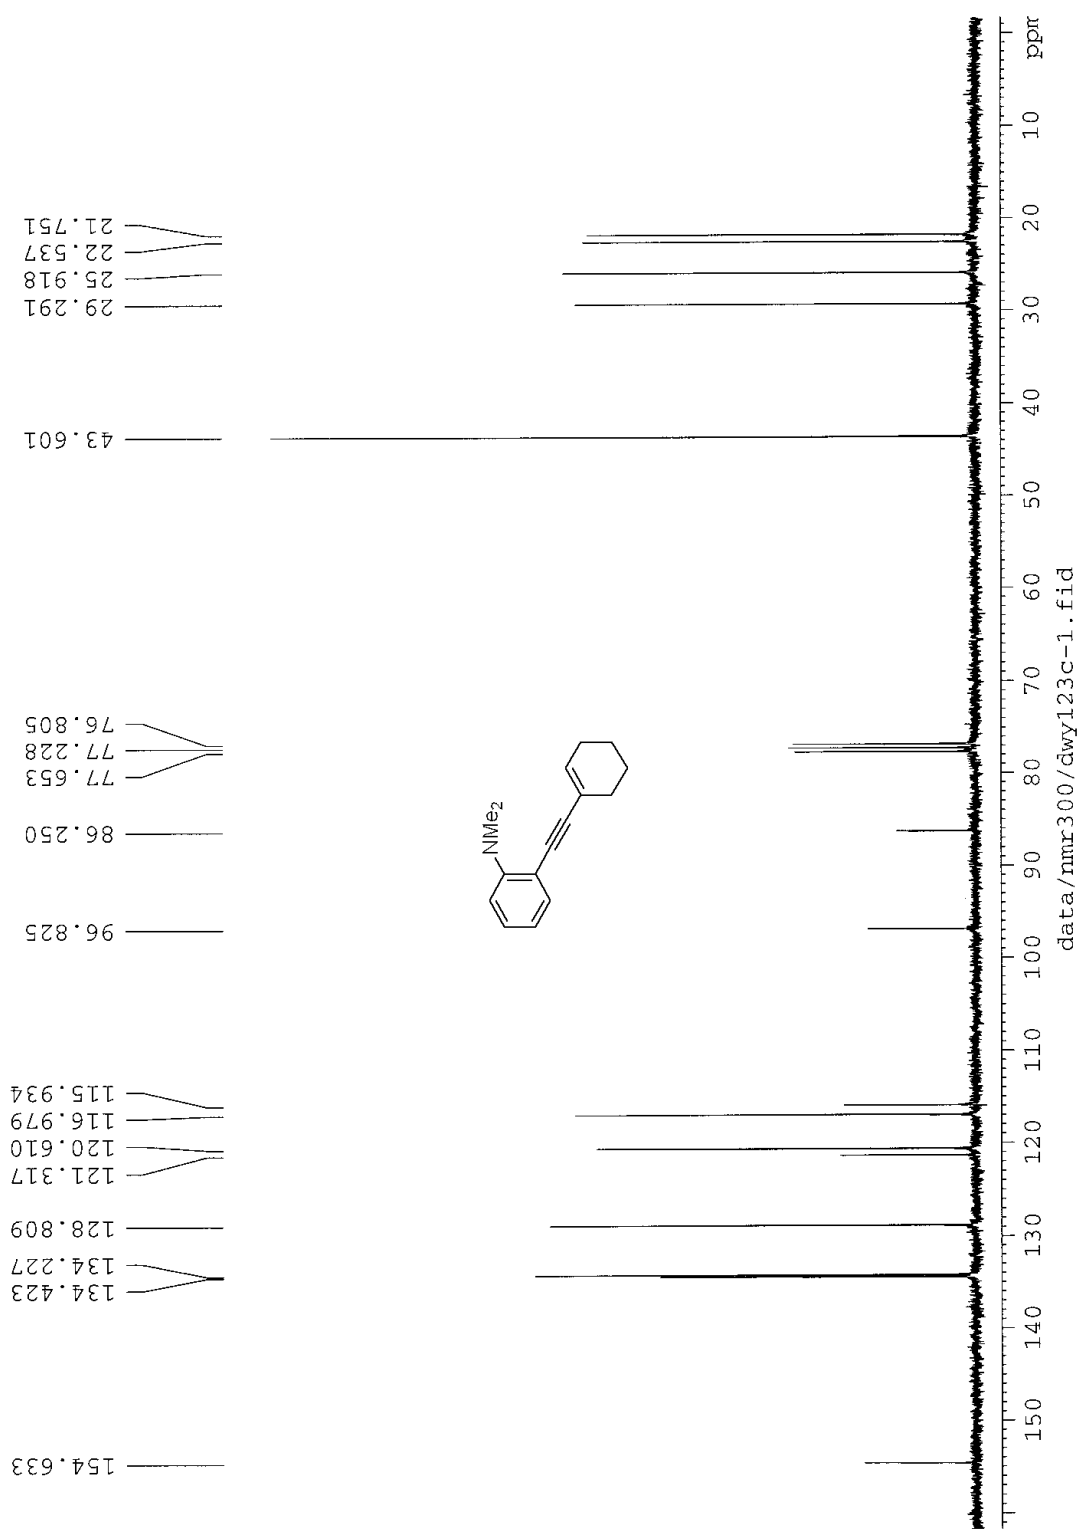

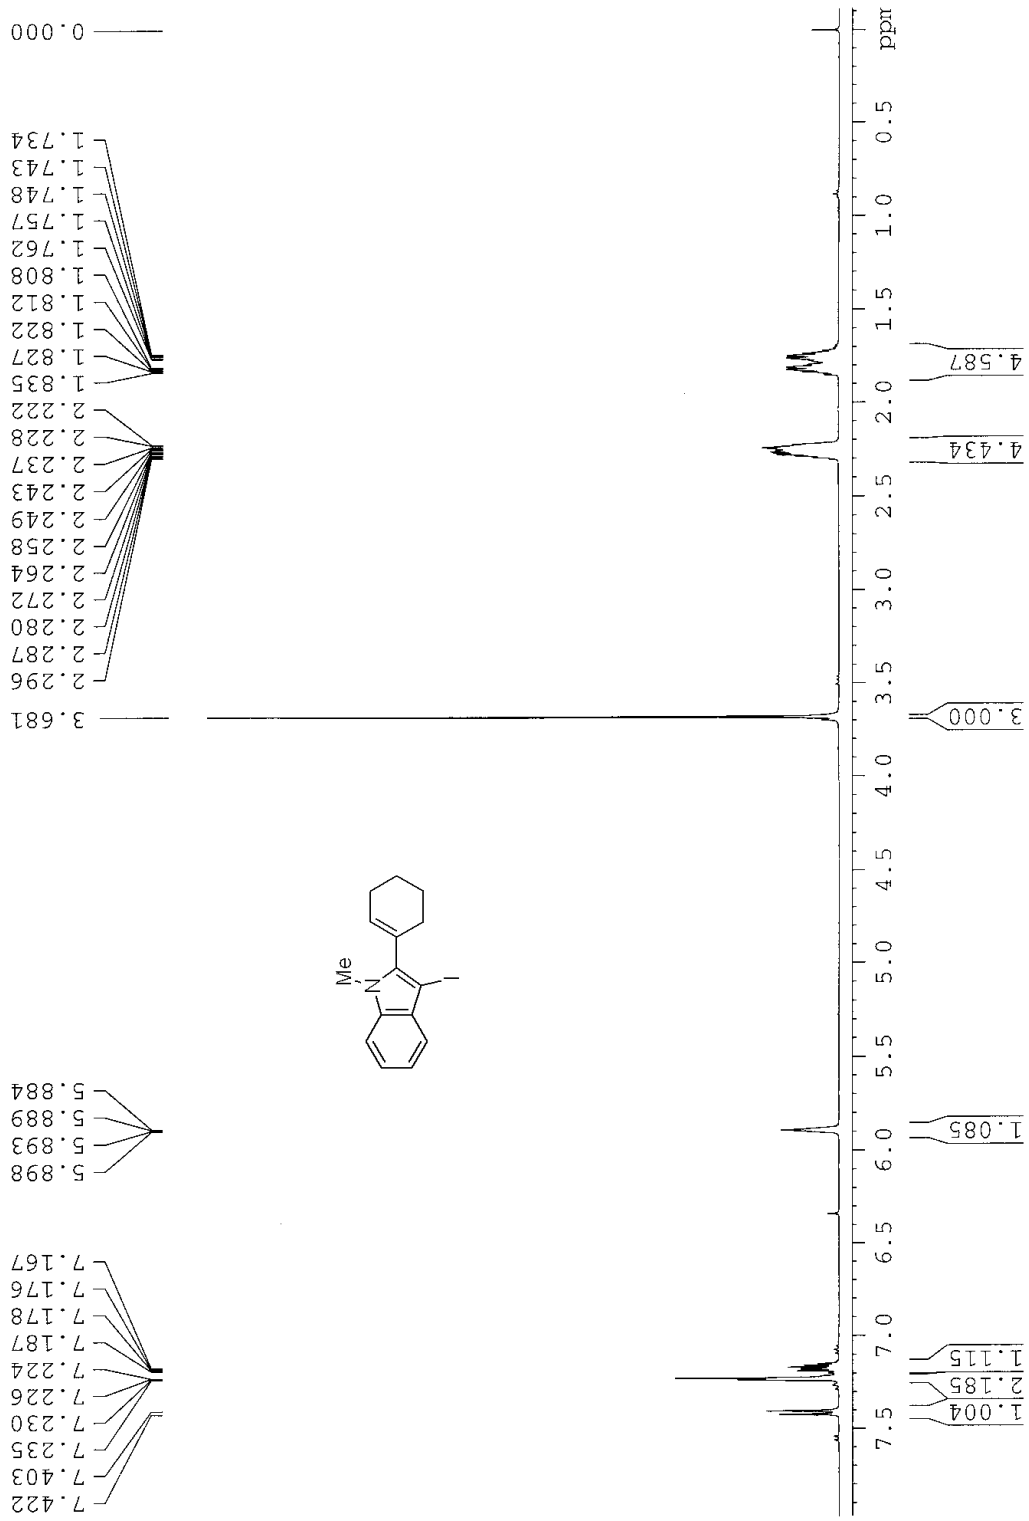

date/nmr400/dwy114

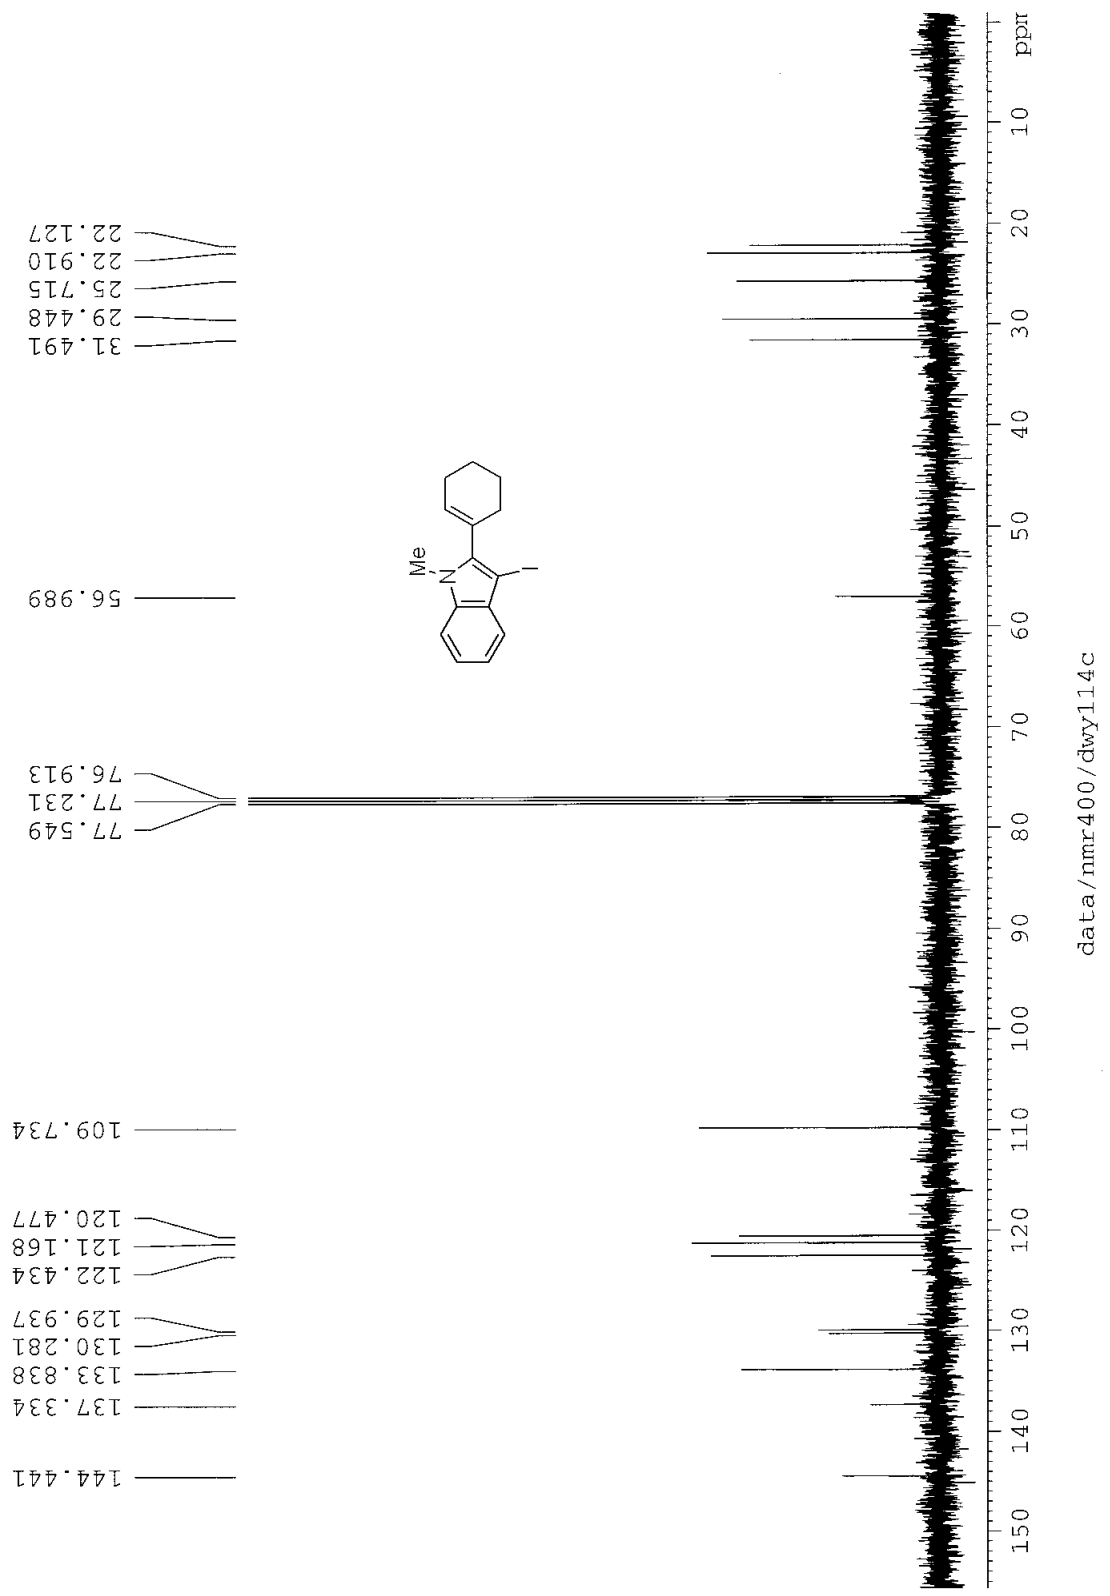

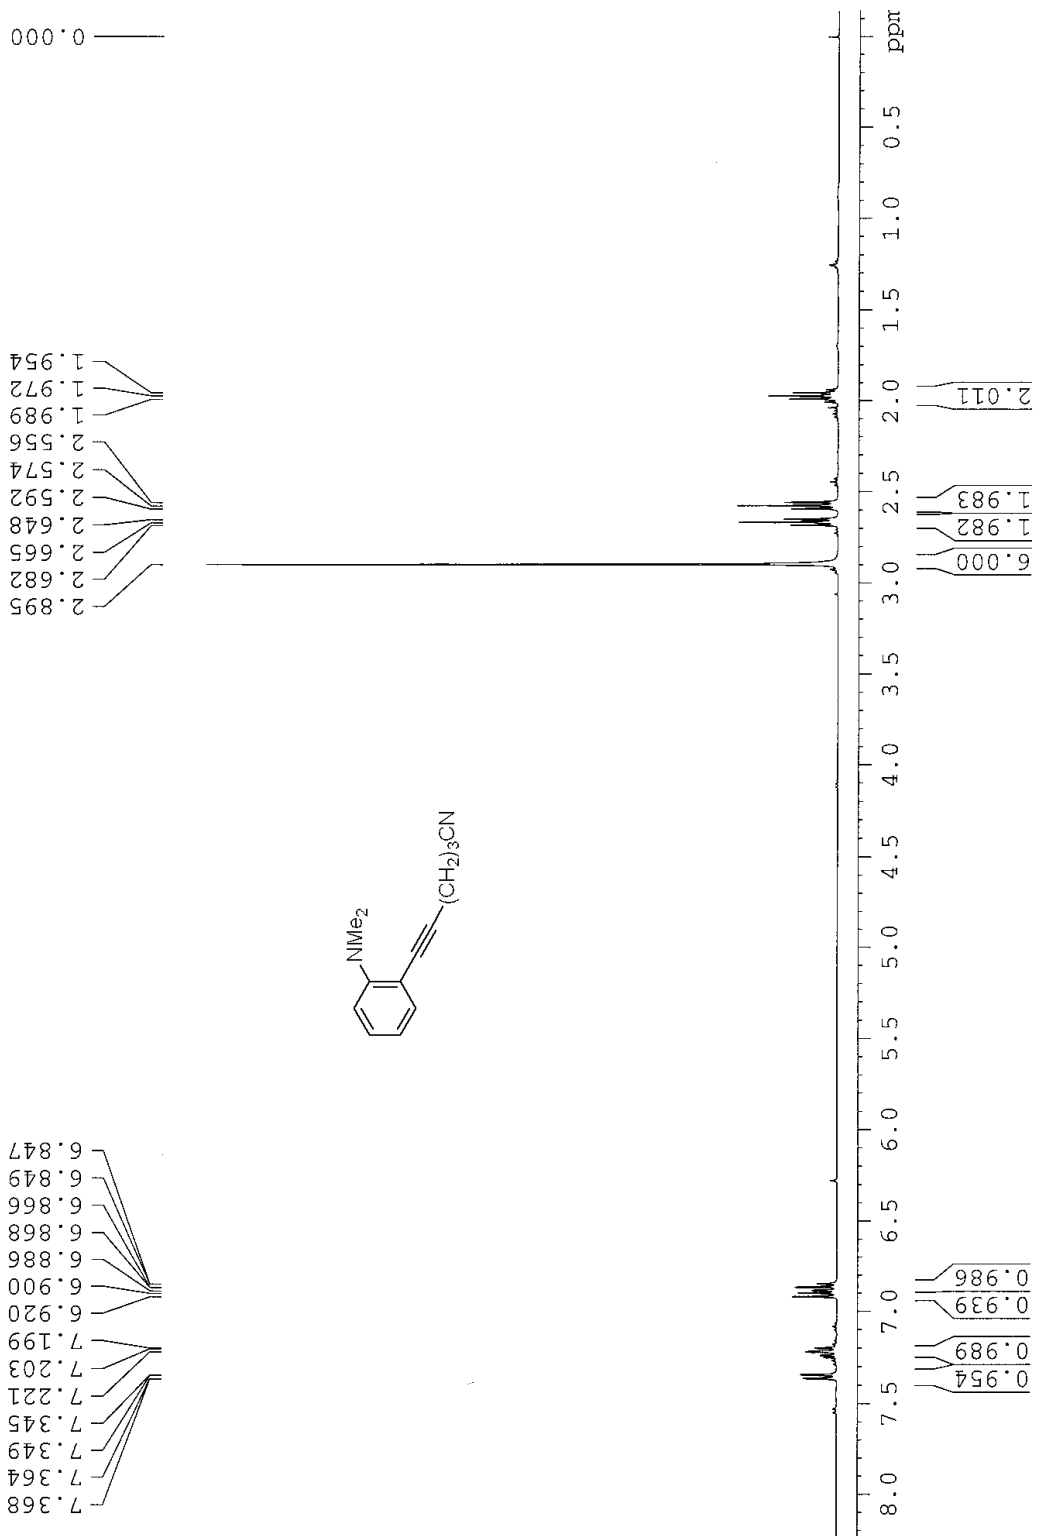

data/nmr-400/dwy126



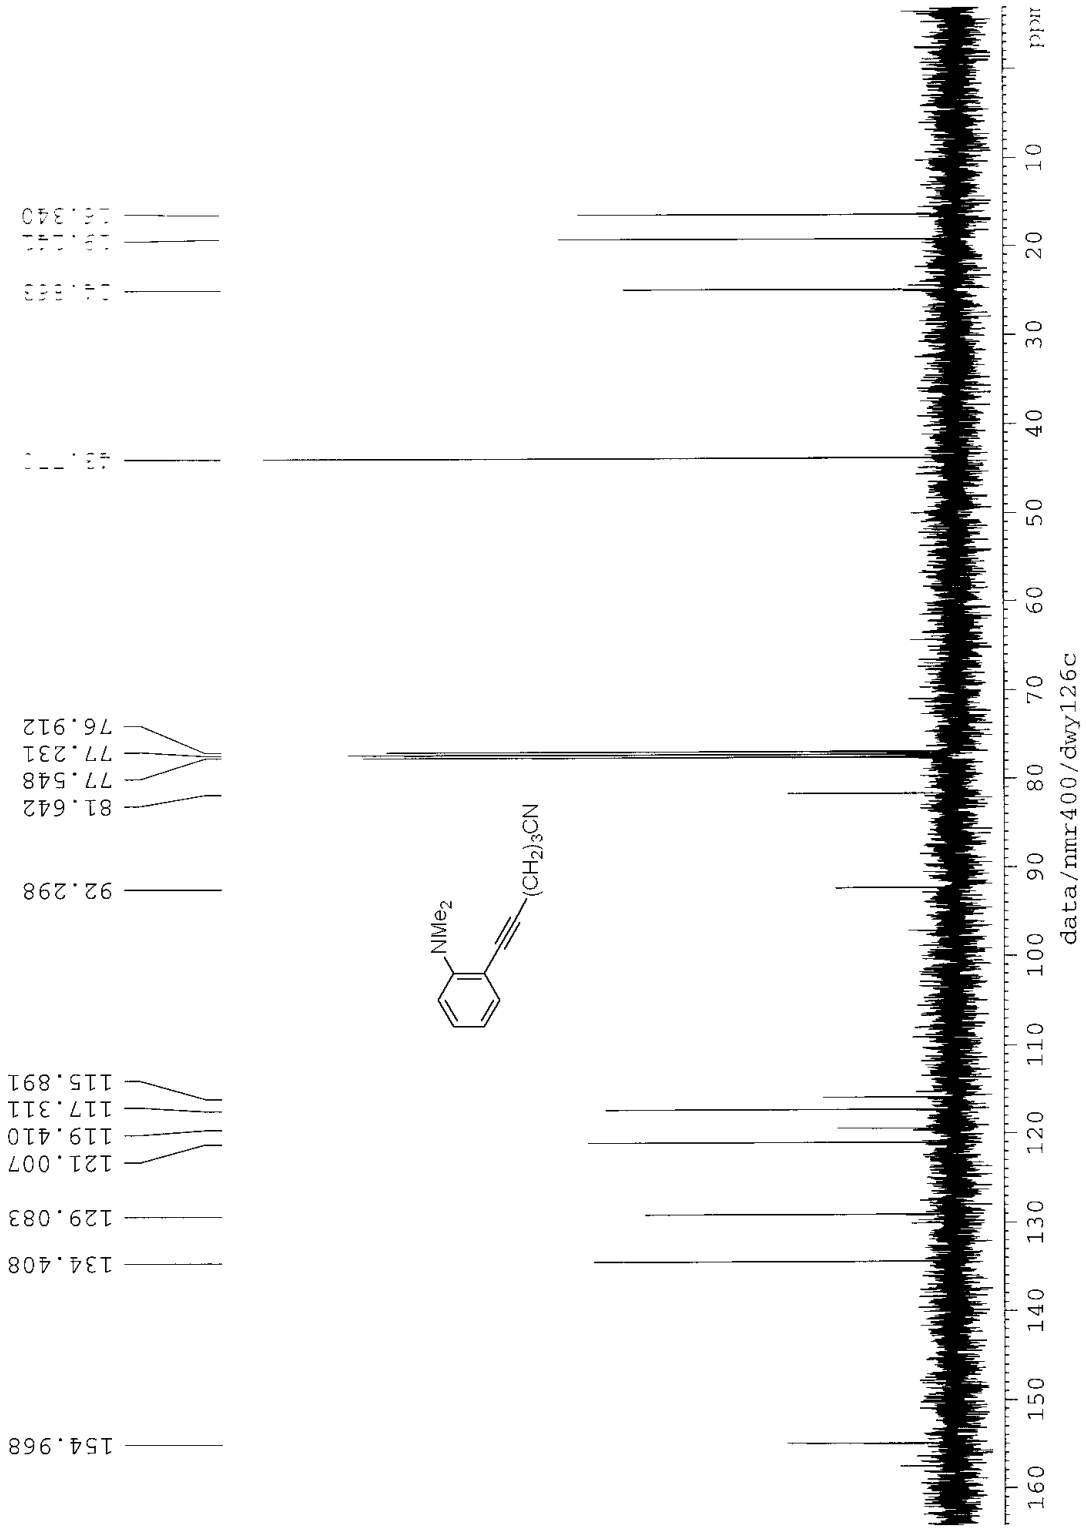

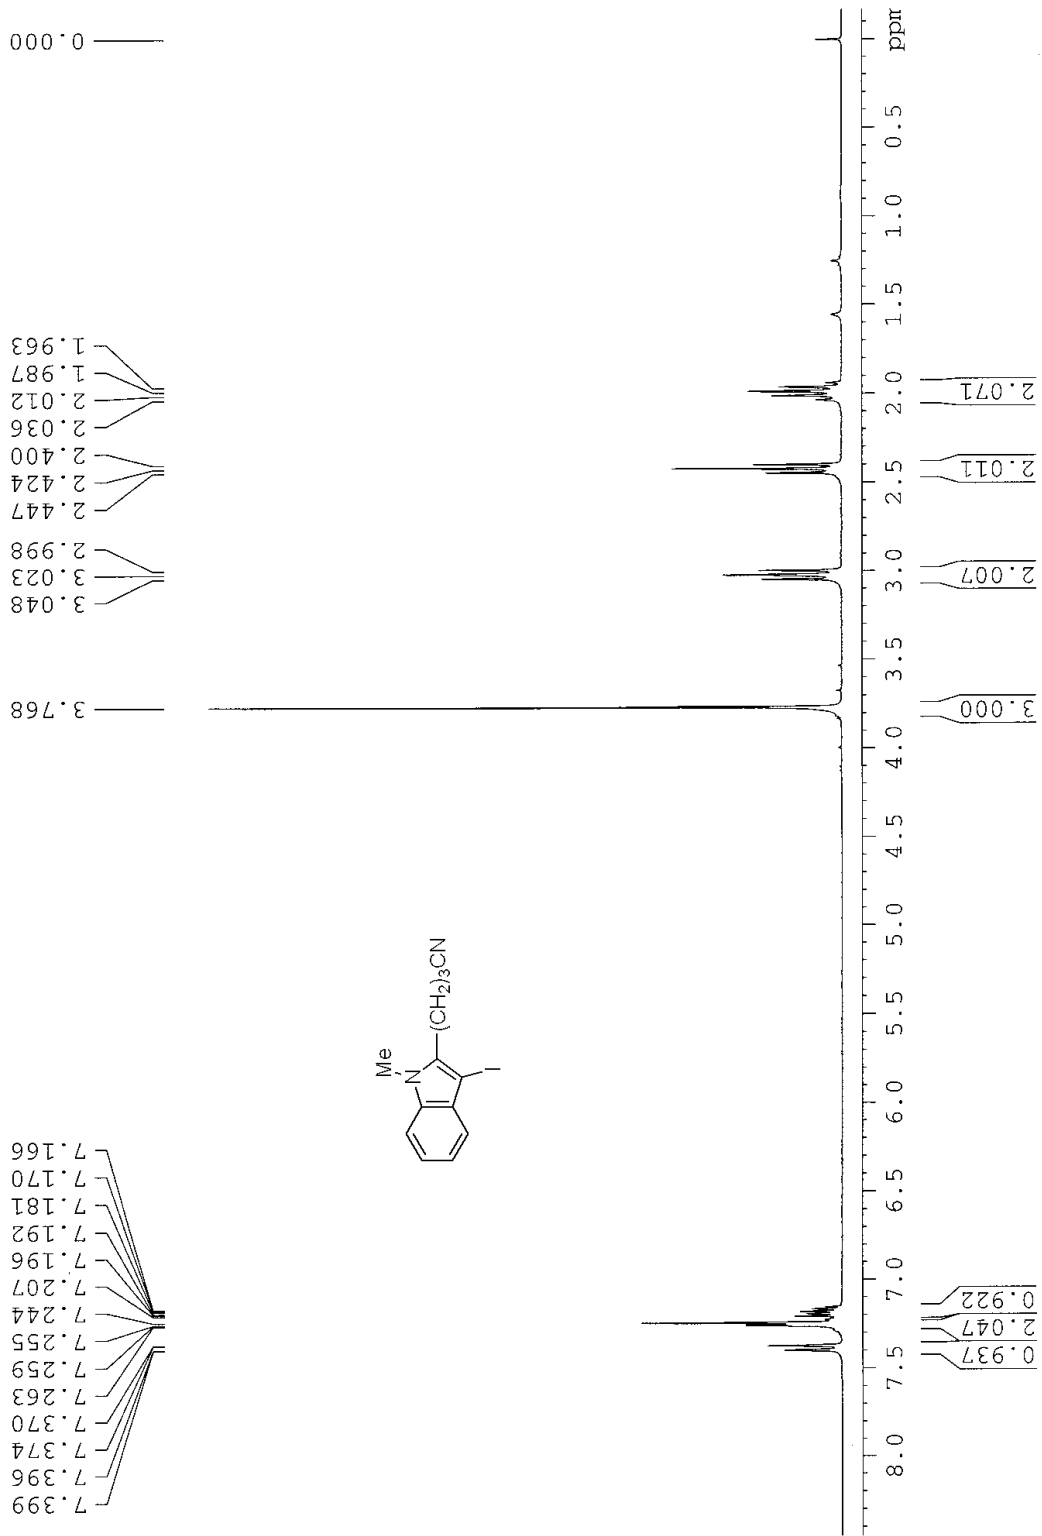

data/nmr300/dwy125.fid

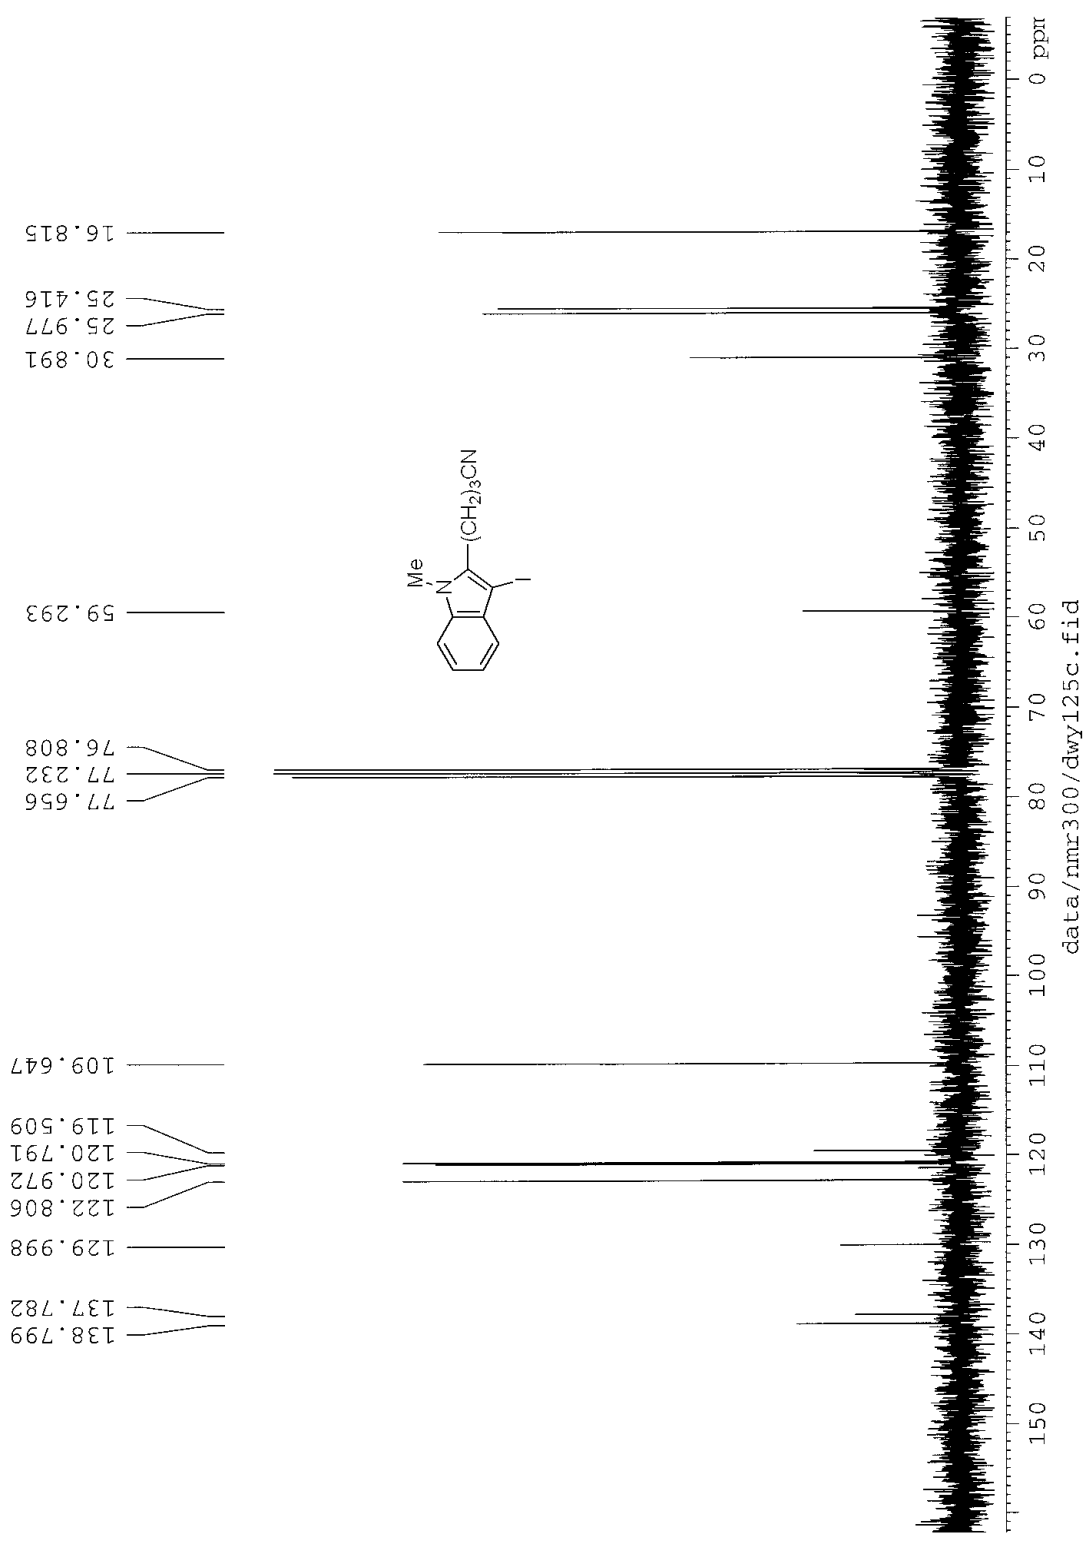

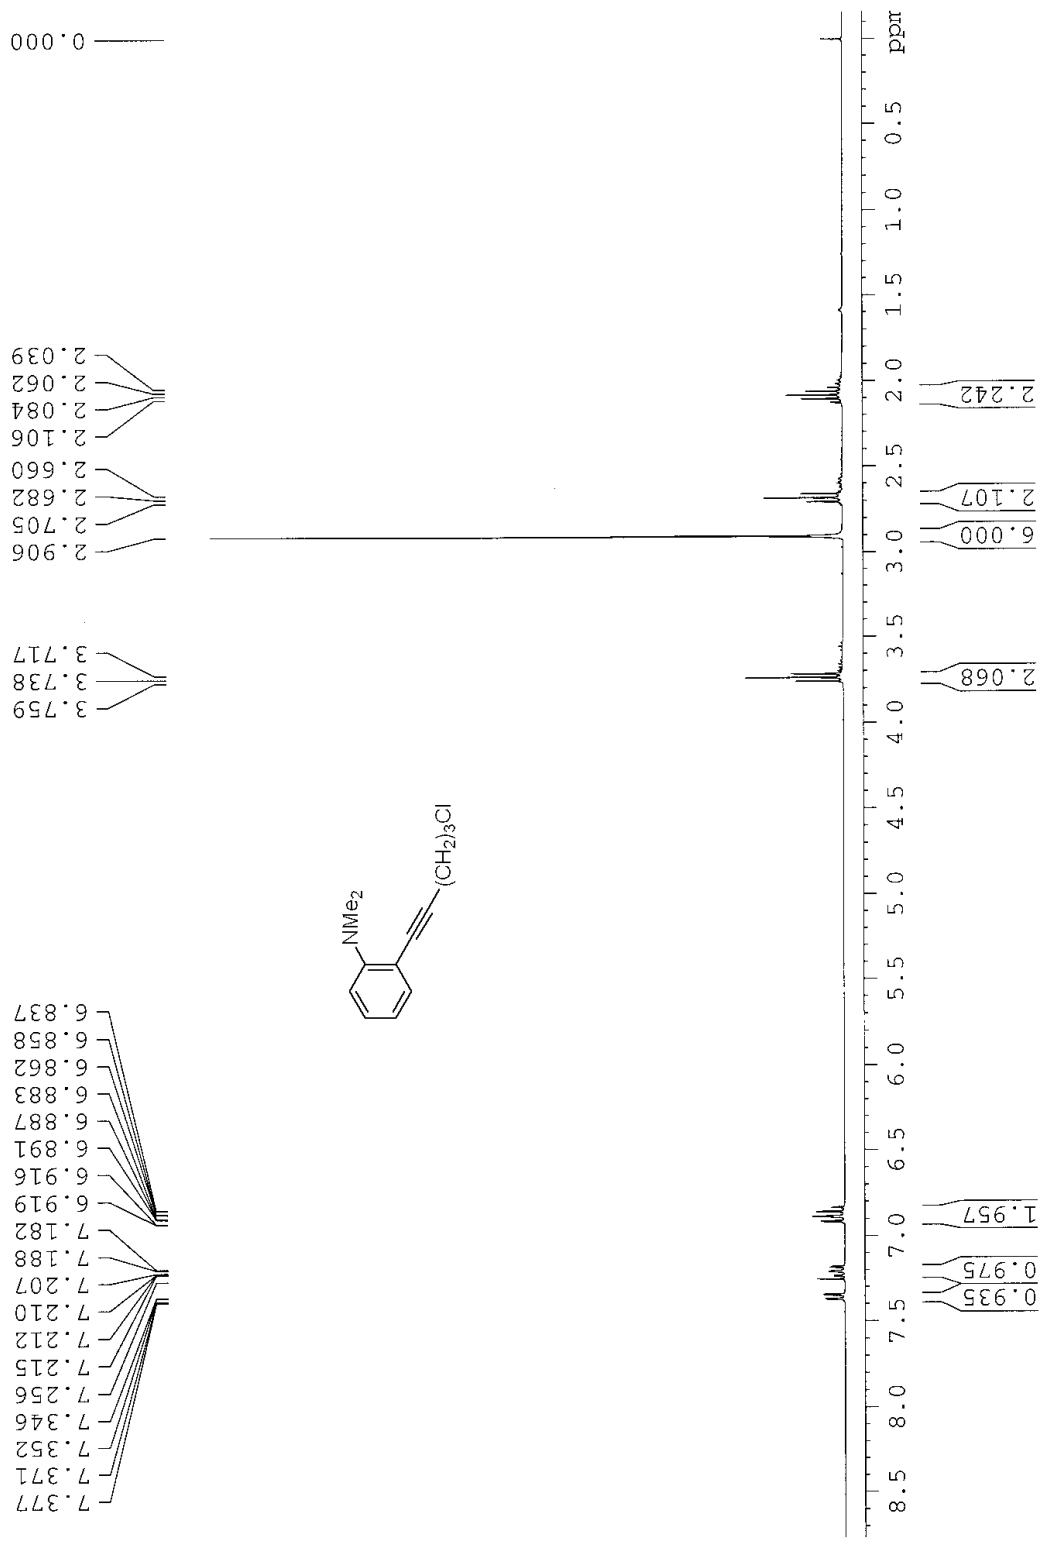

data/nmr300/dwy136

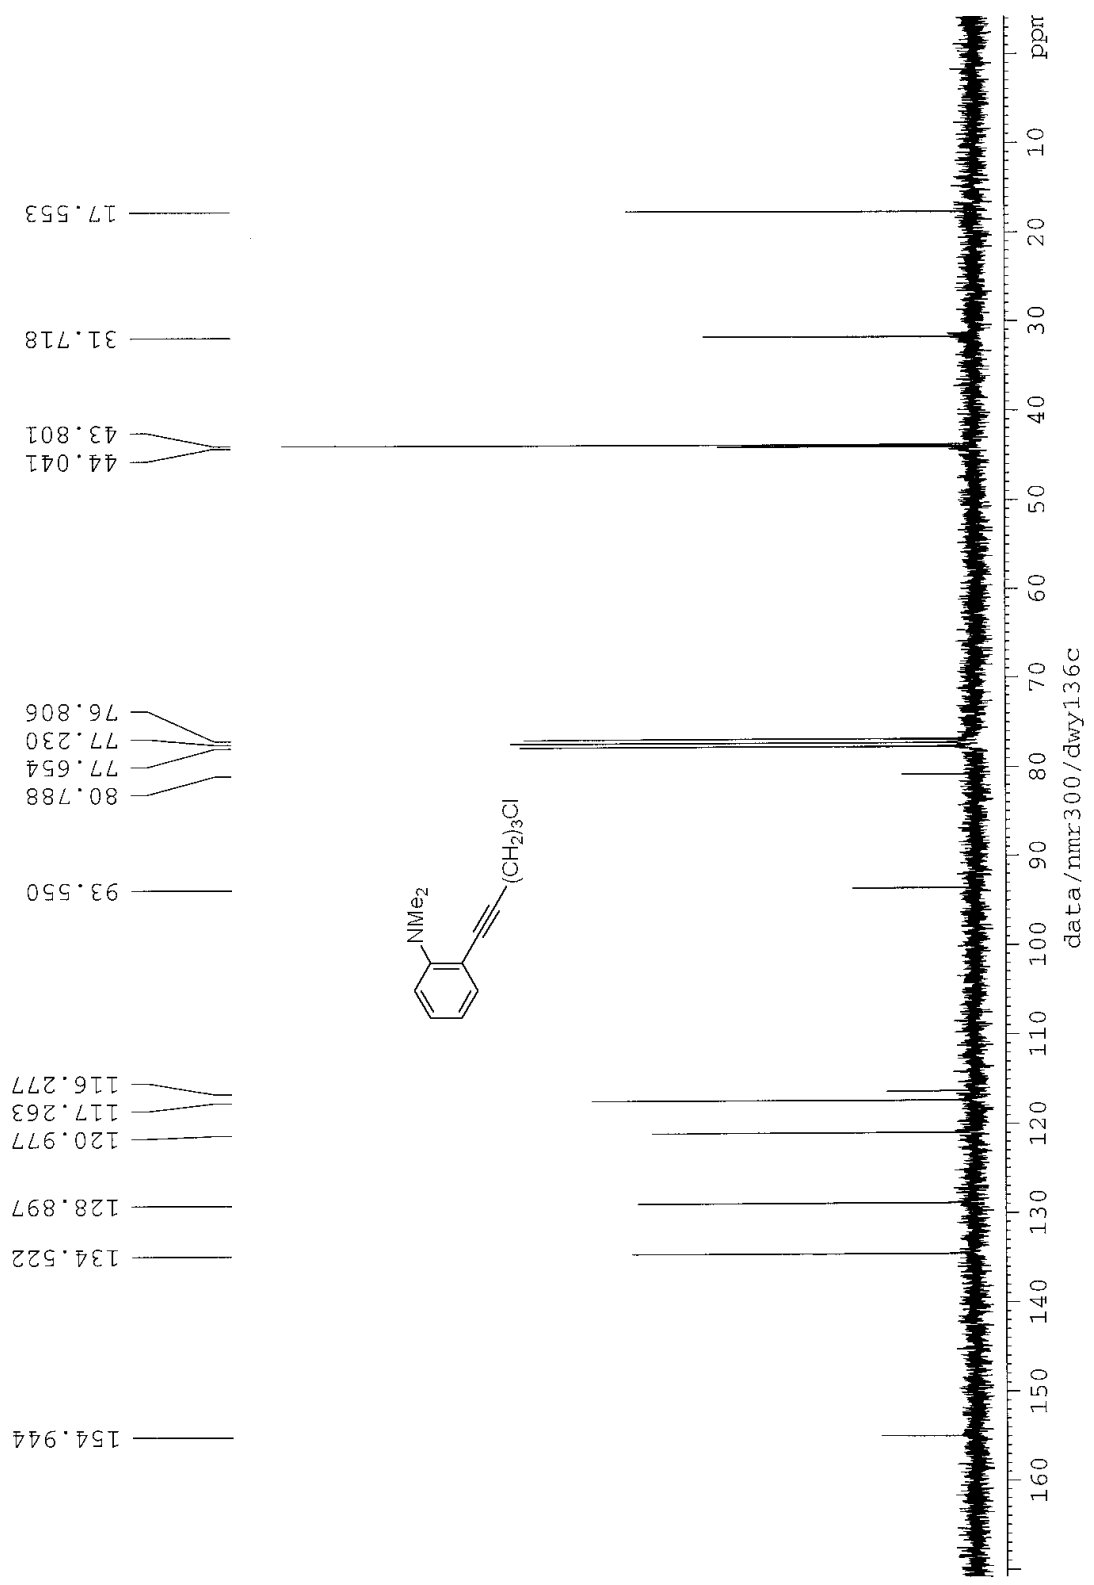

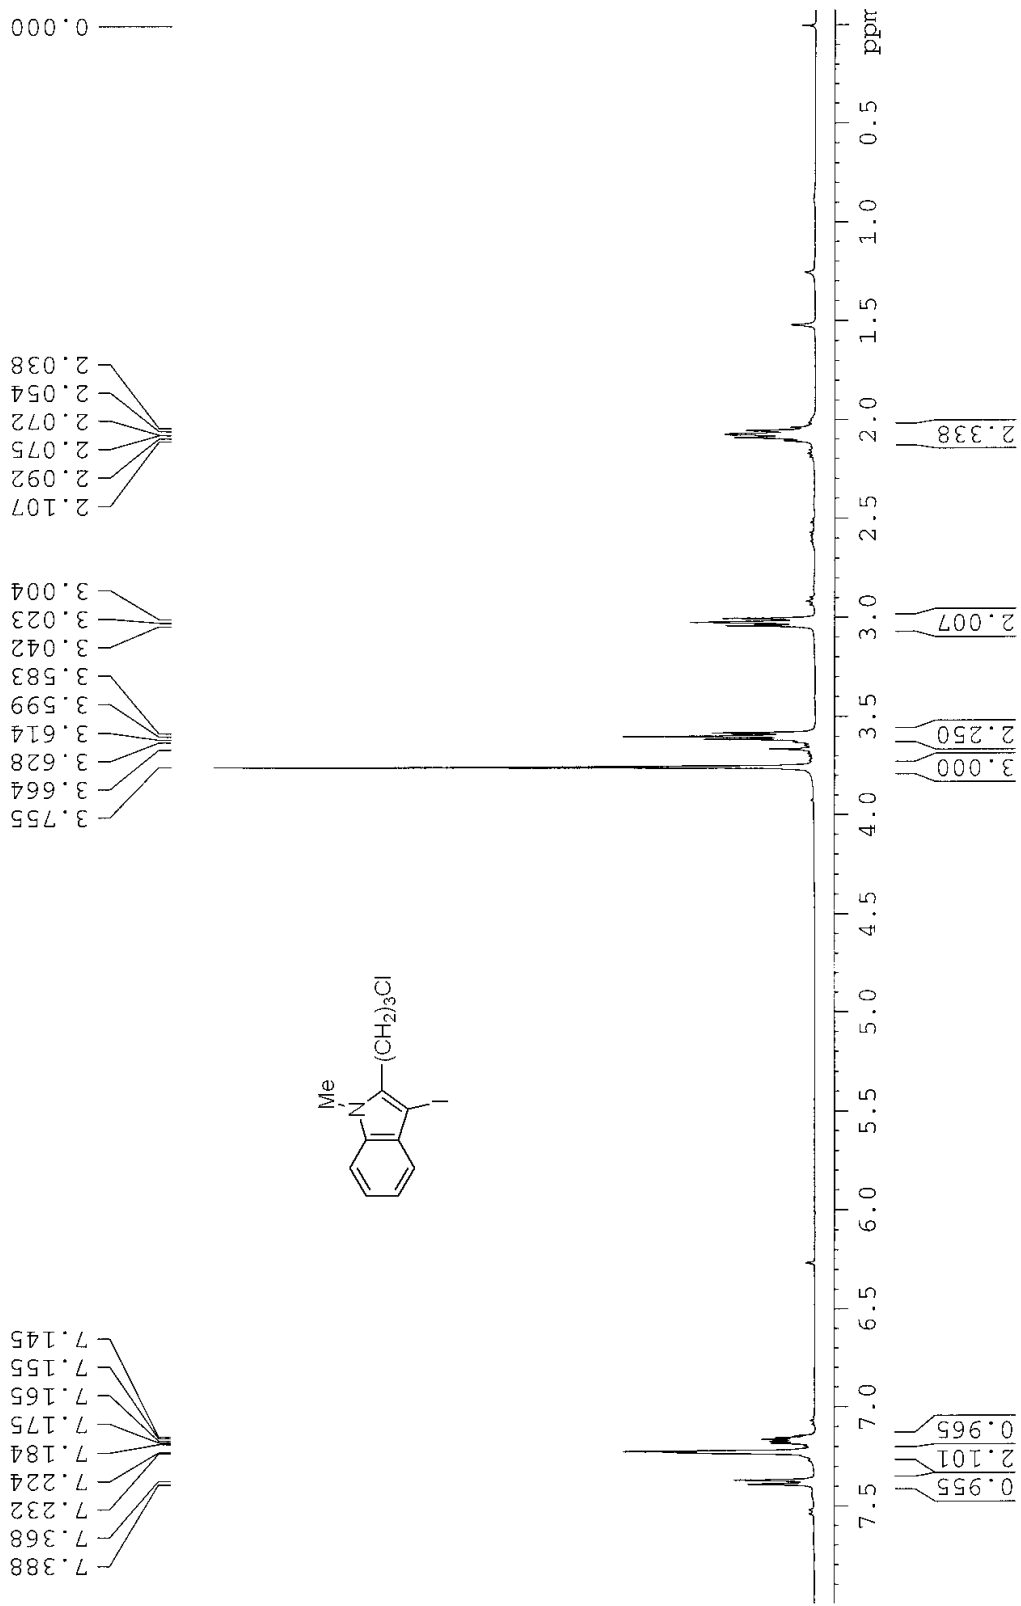

data/nmr400/dwy129

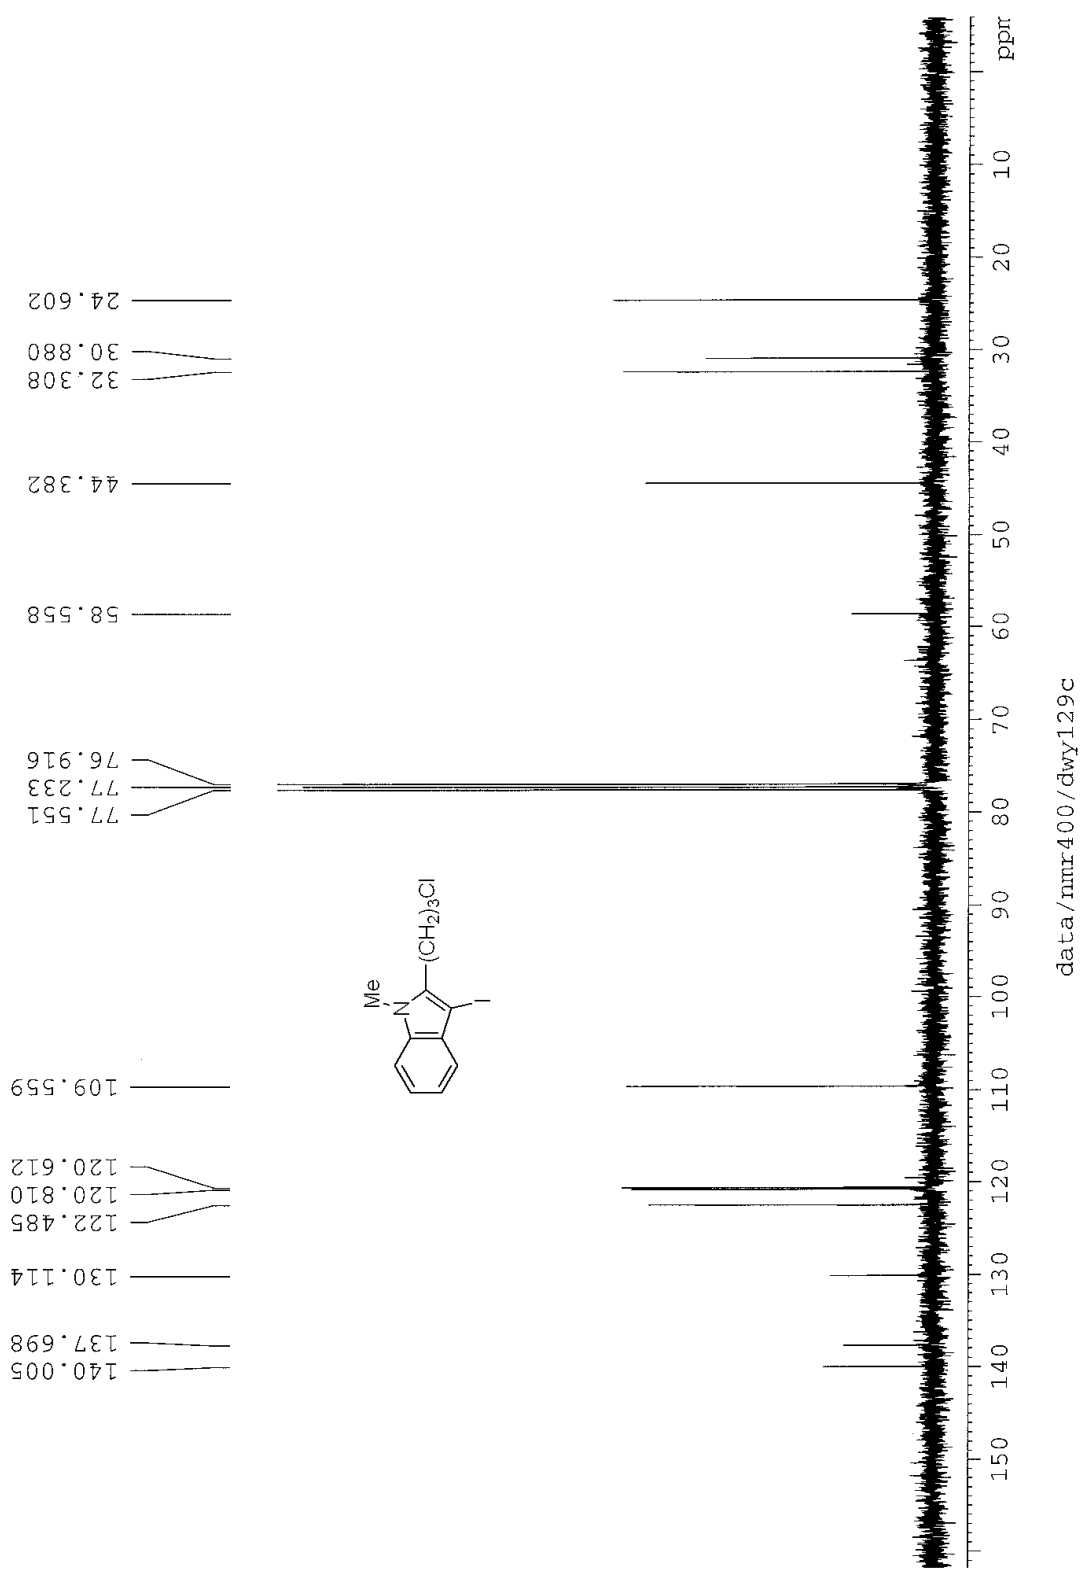

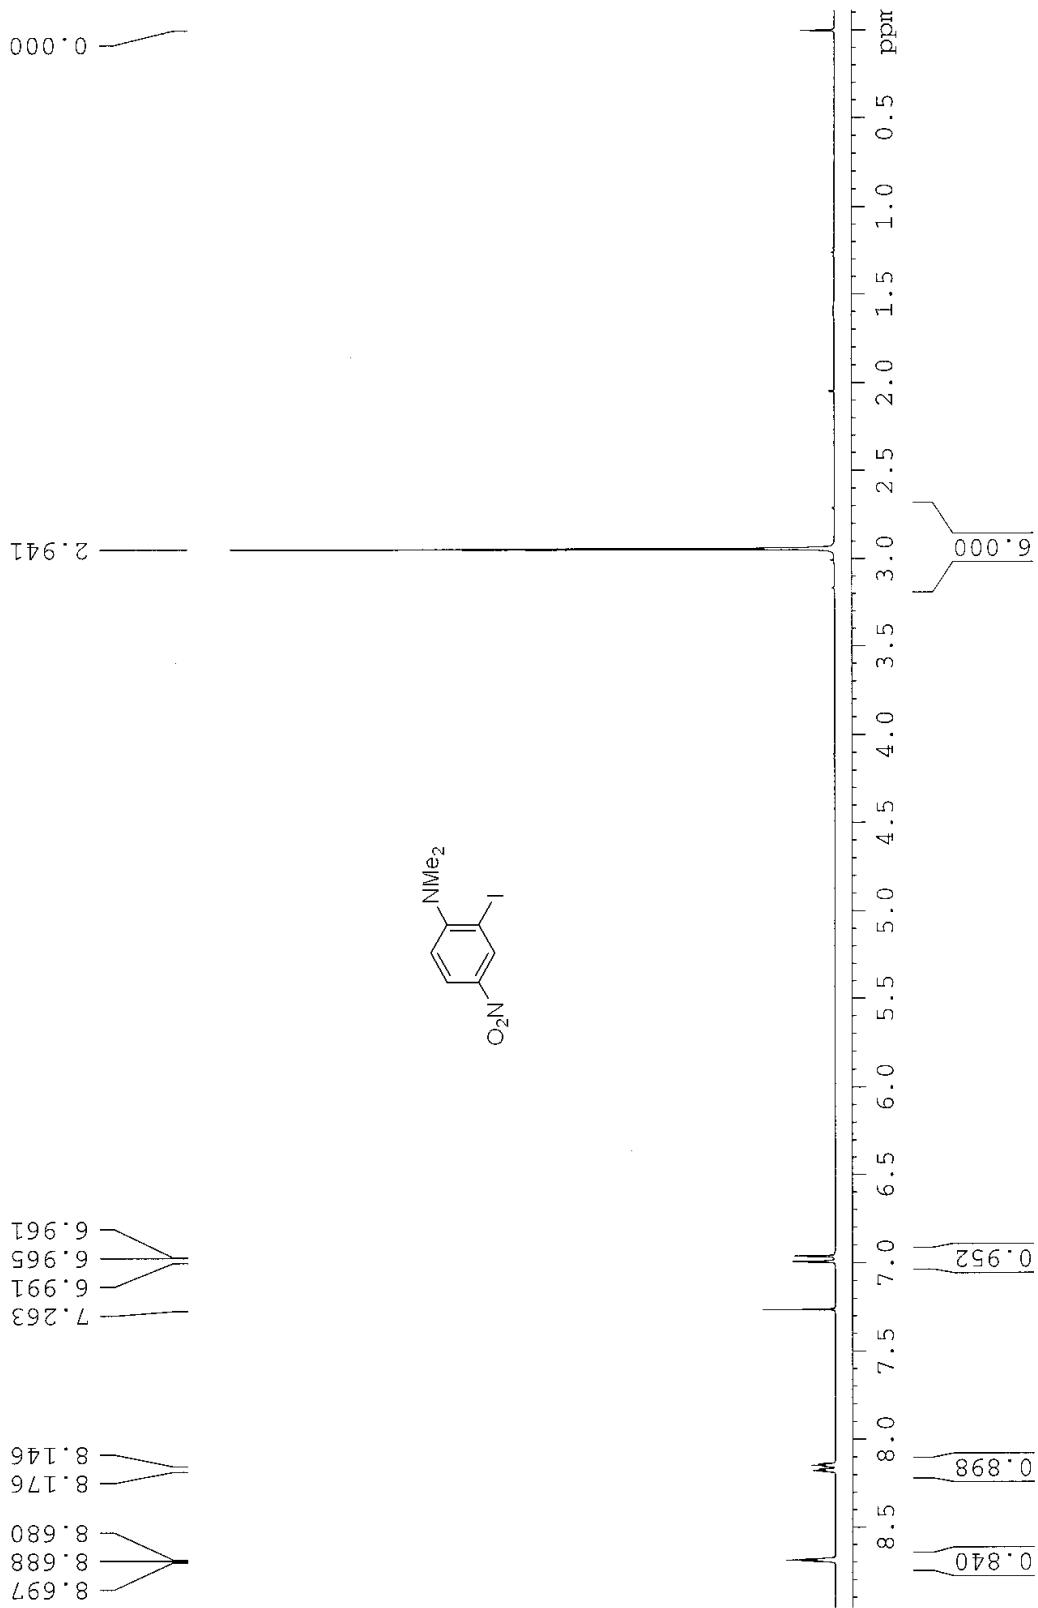

data/nmr300/dwy134



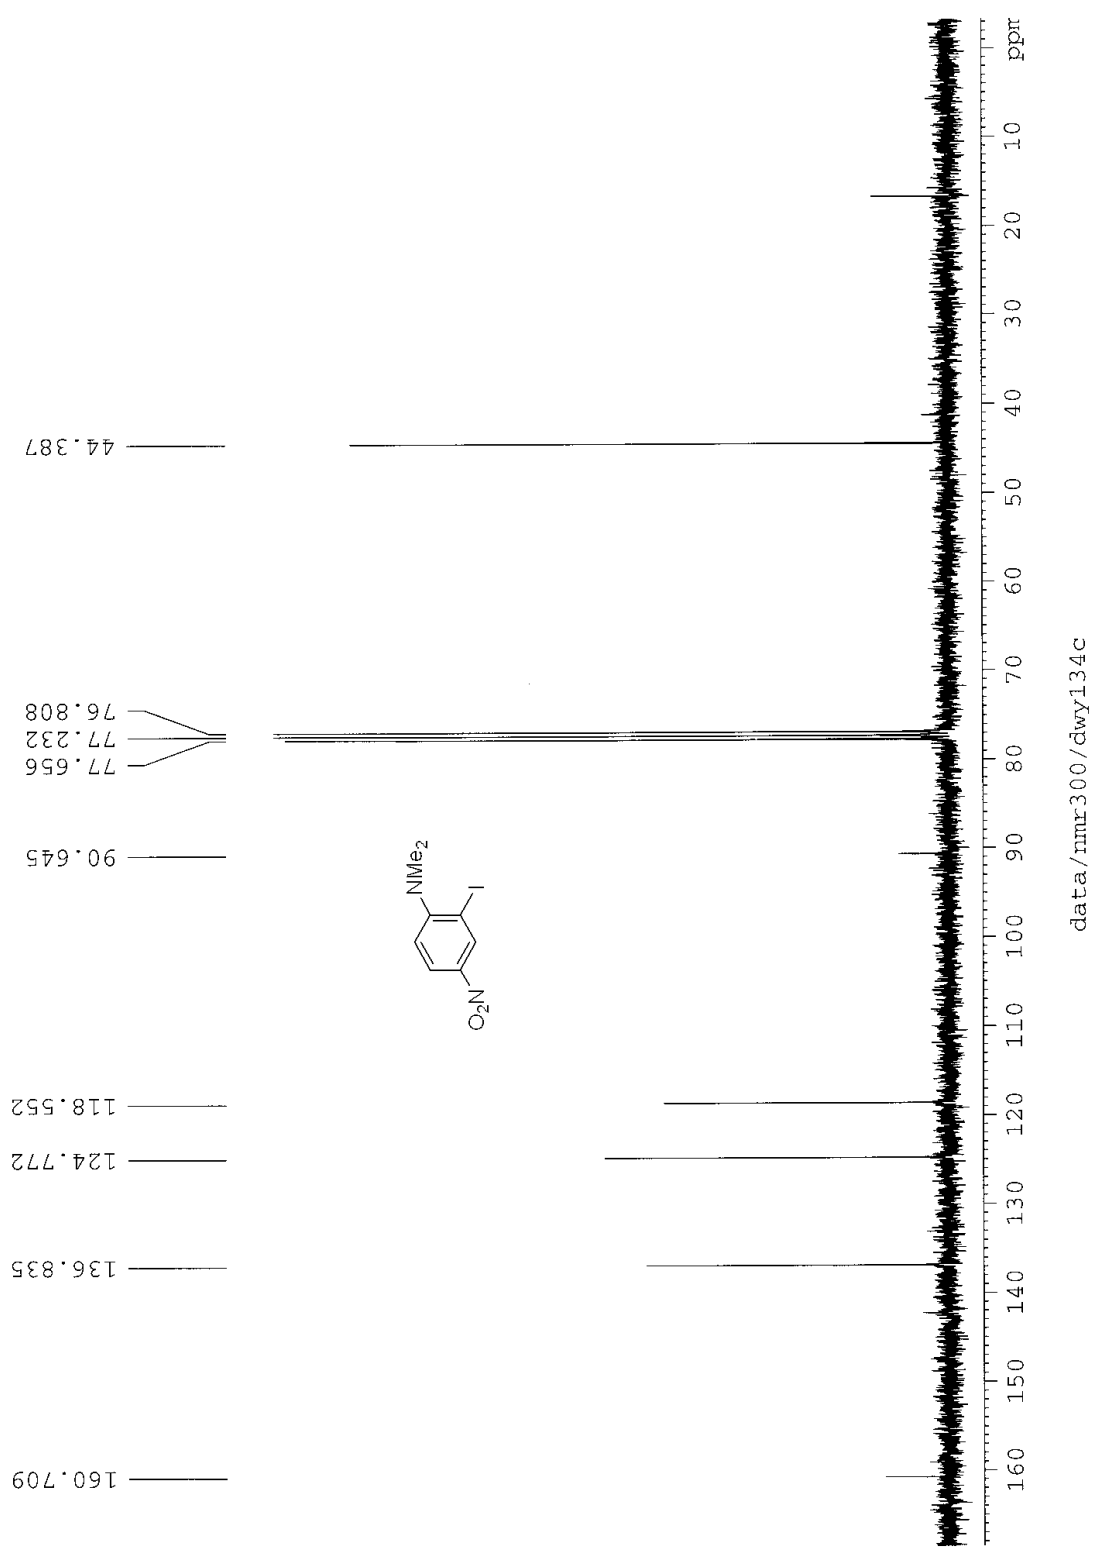

0.000

3.258

8.354  
8.348  
8.068  
8.062  
8.045  
8.038  
7.524  
7.513  
7.505  
7.500  
7.376  
7.373  
7.365  
7.359  
7.260  
6.790  
6.767

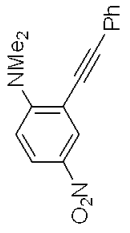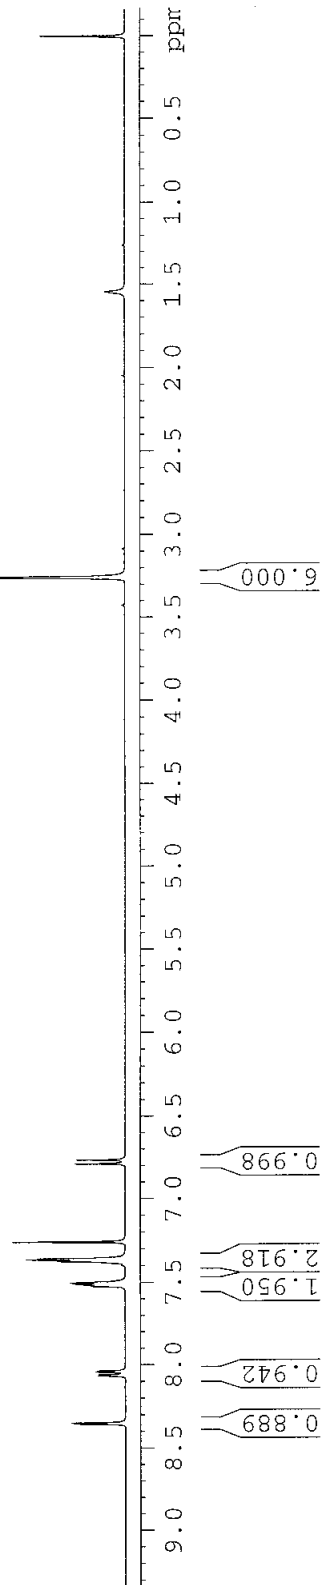

data/nmr400/dwy132

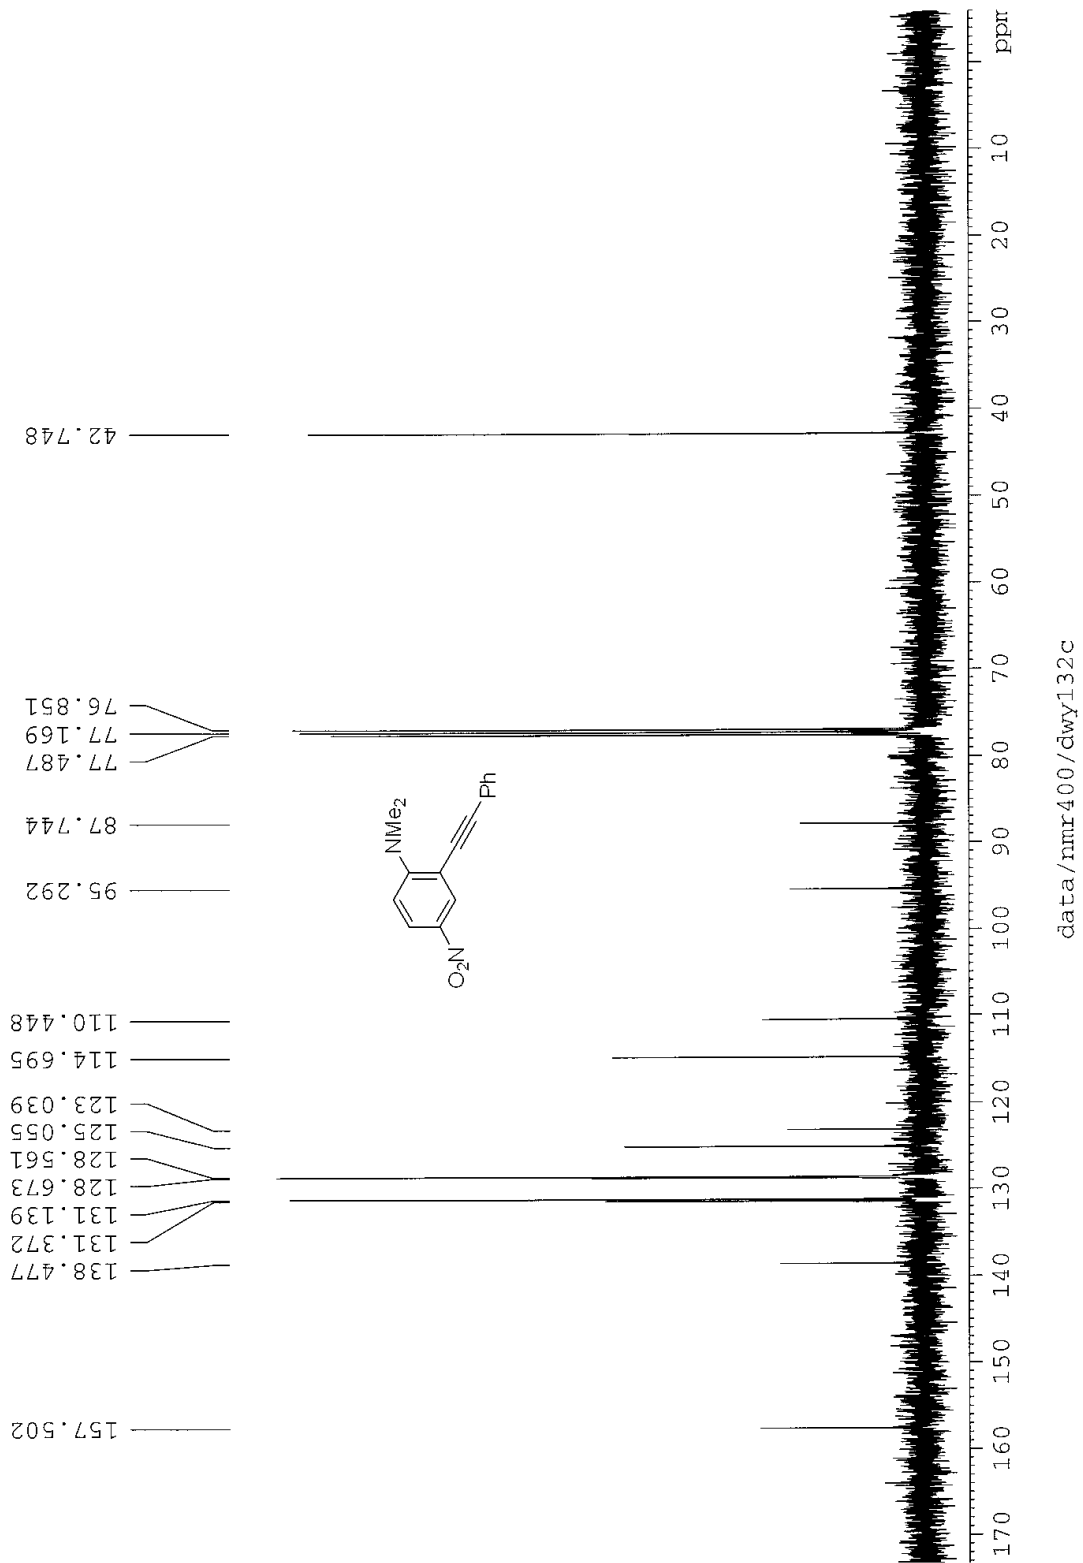

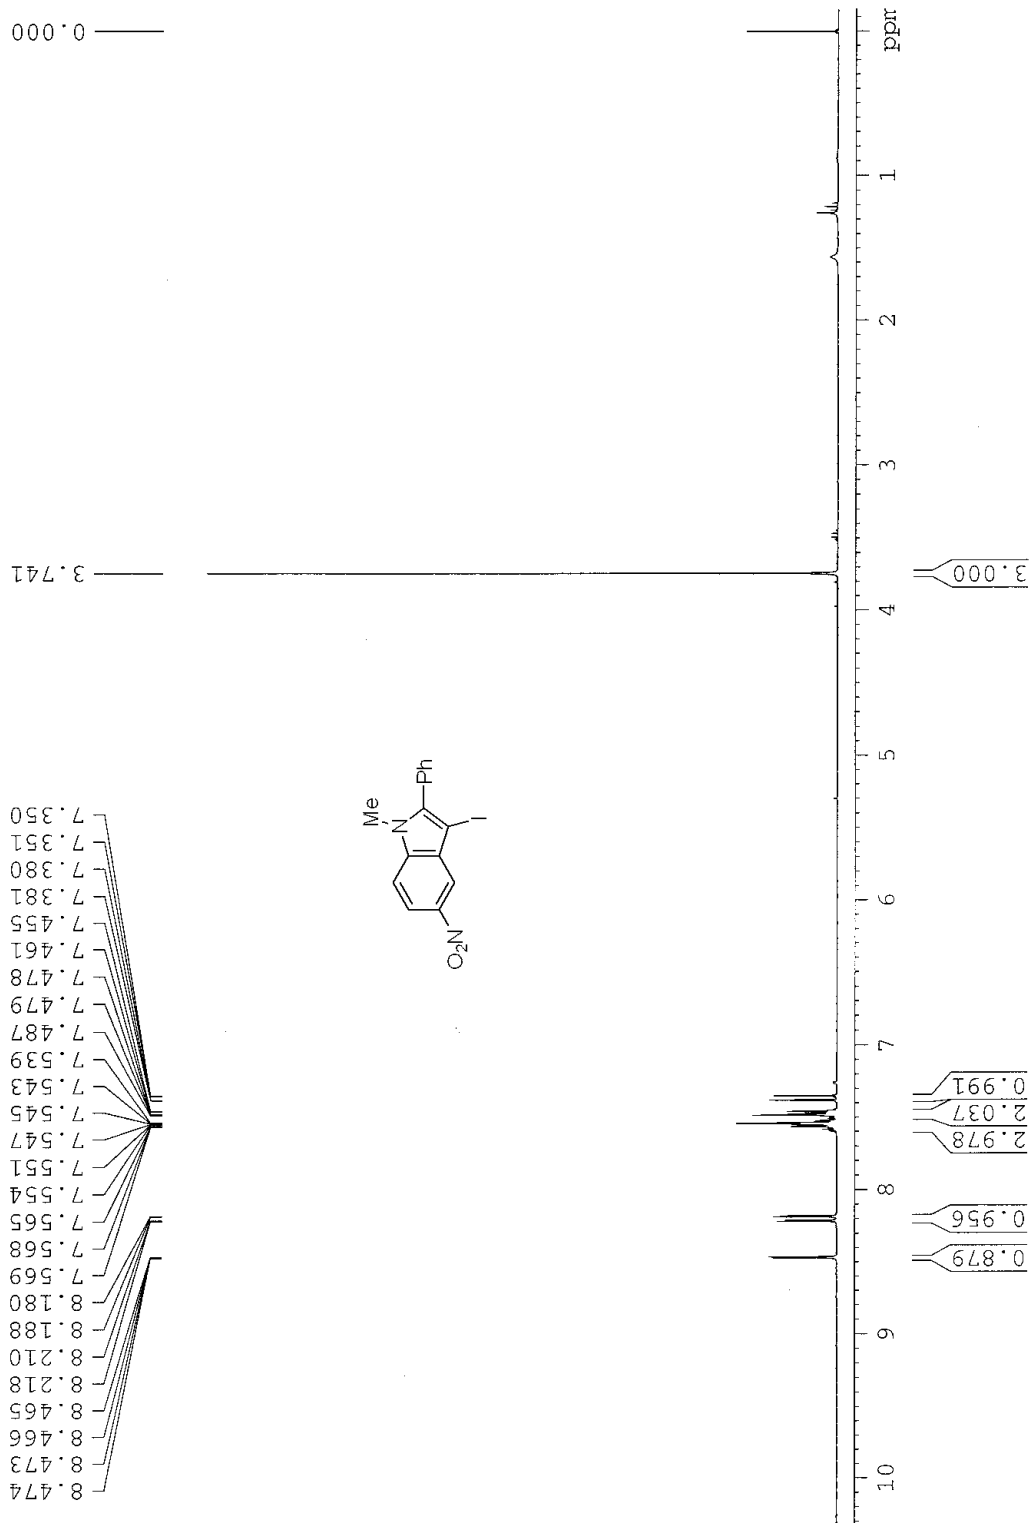

data/nmr300/dwy138-1

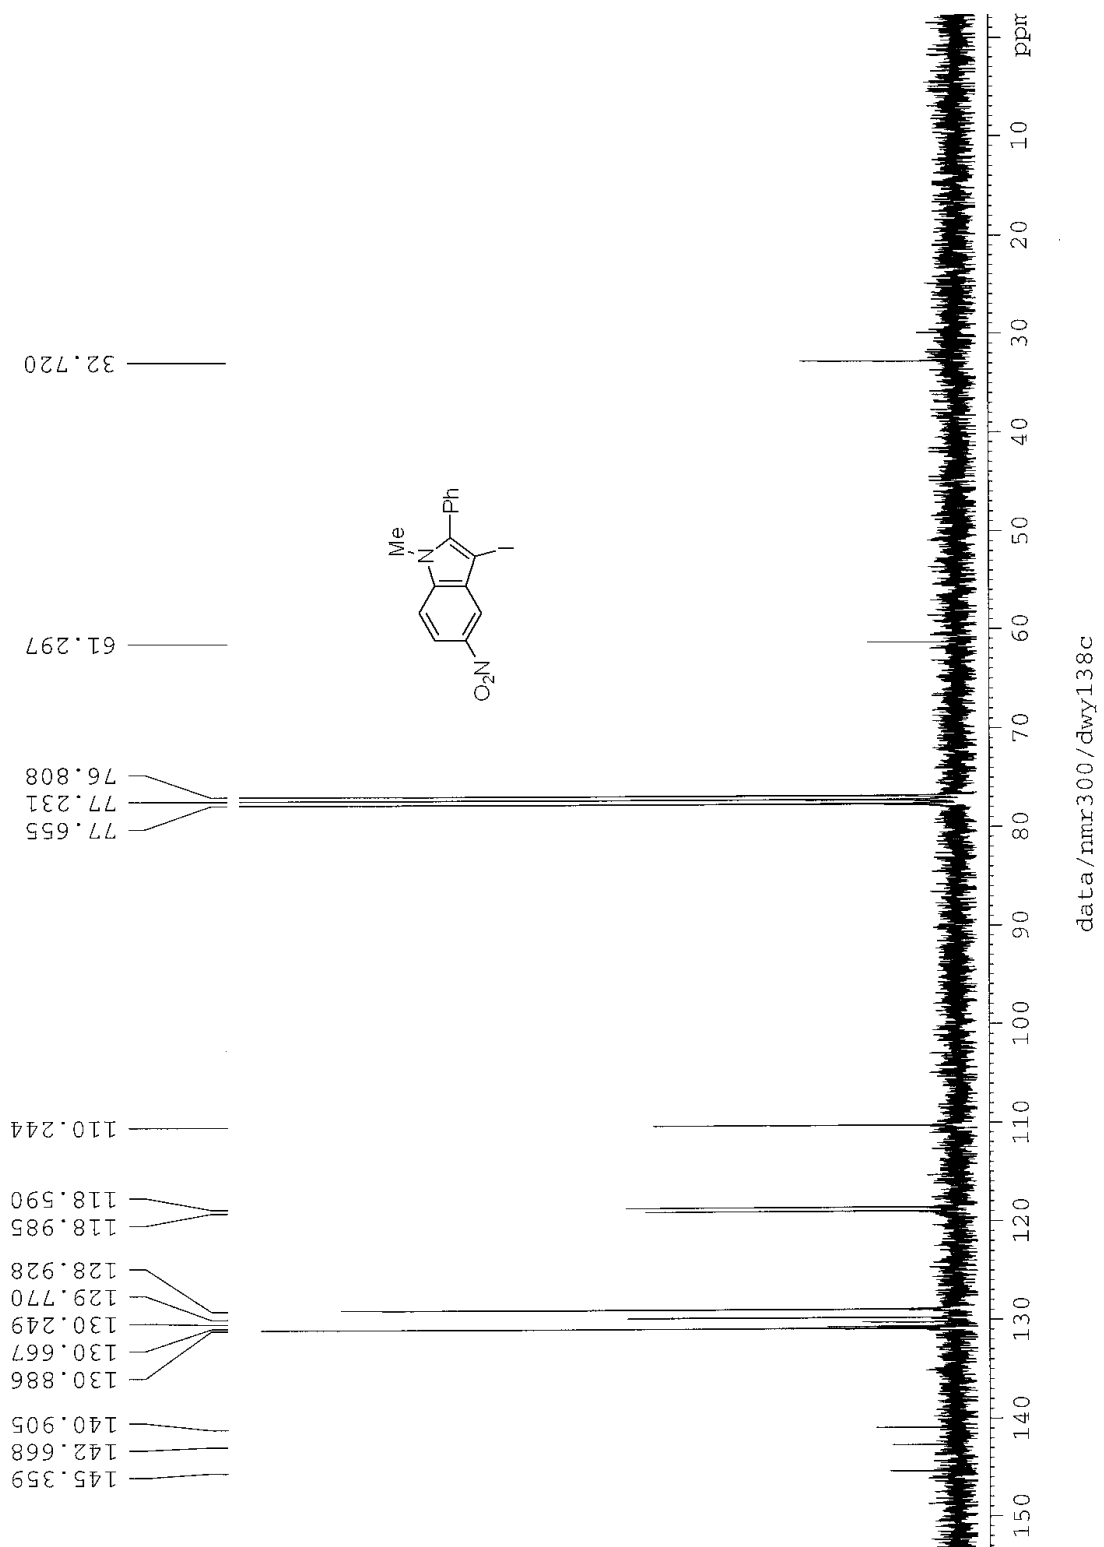

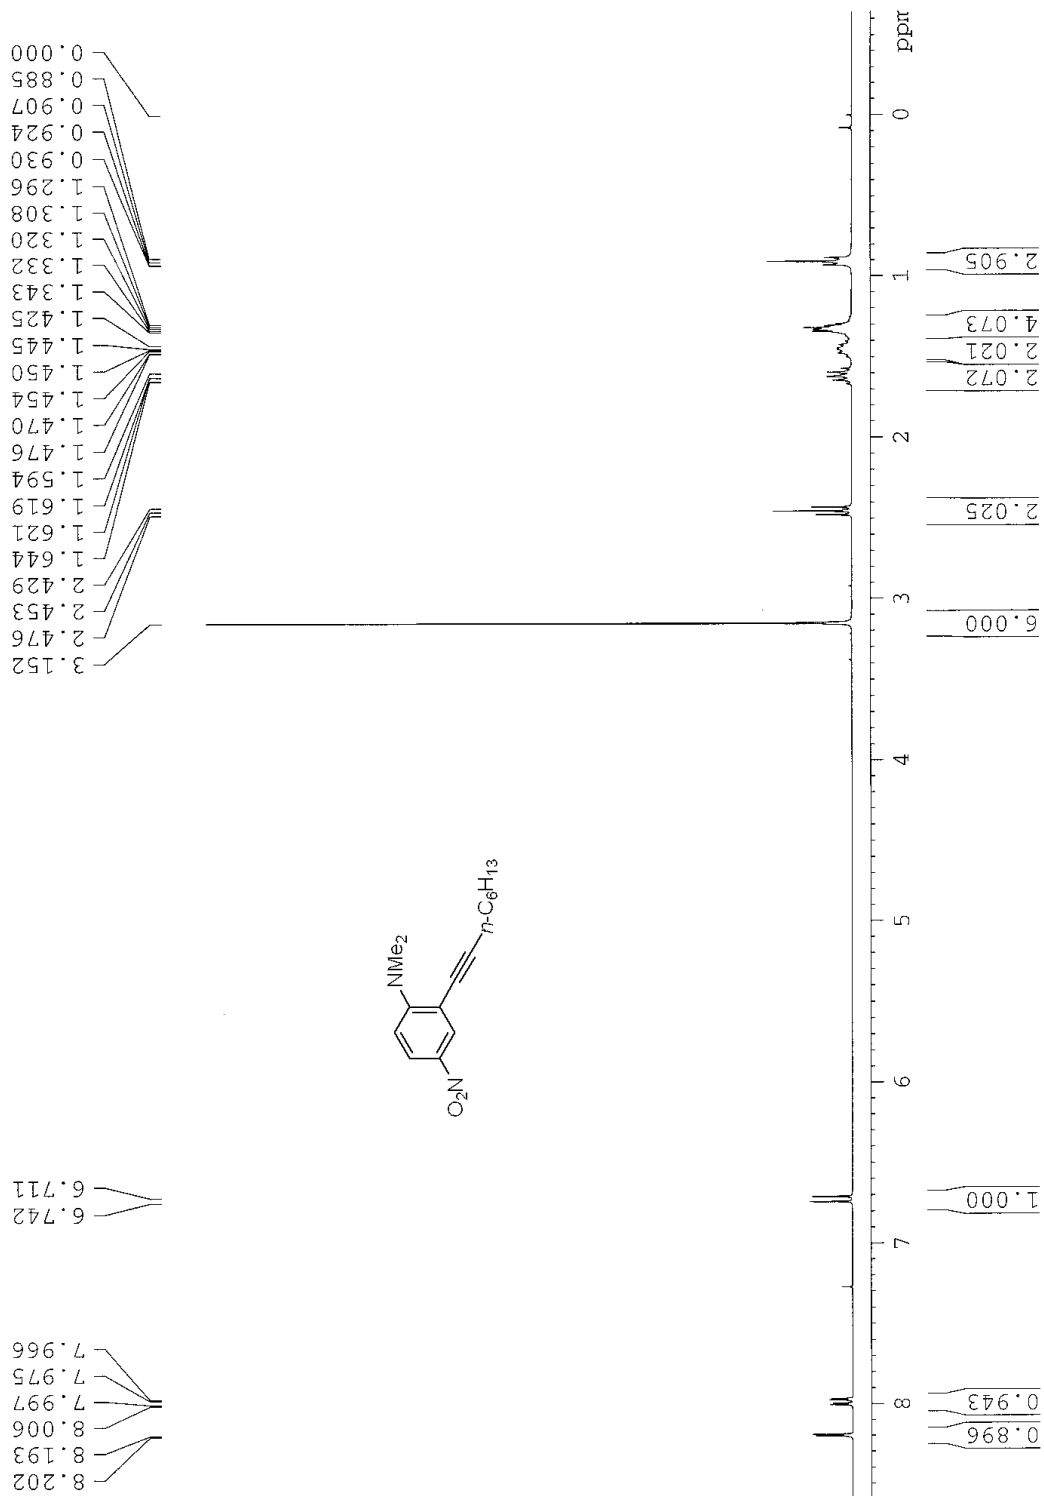

data/nmr300/dwy141

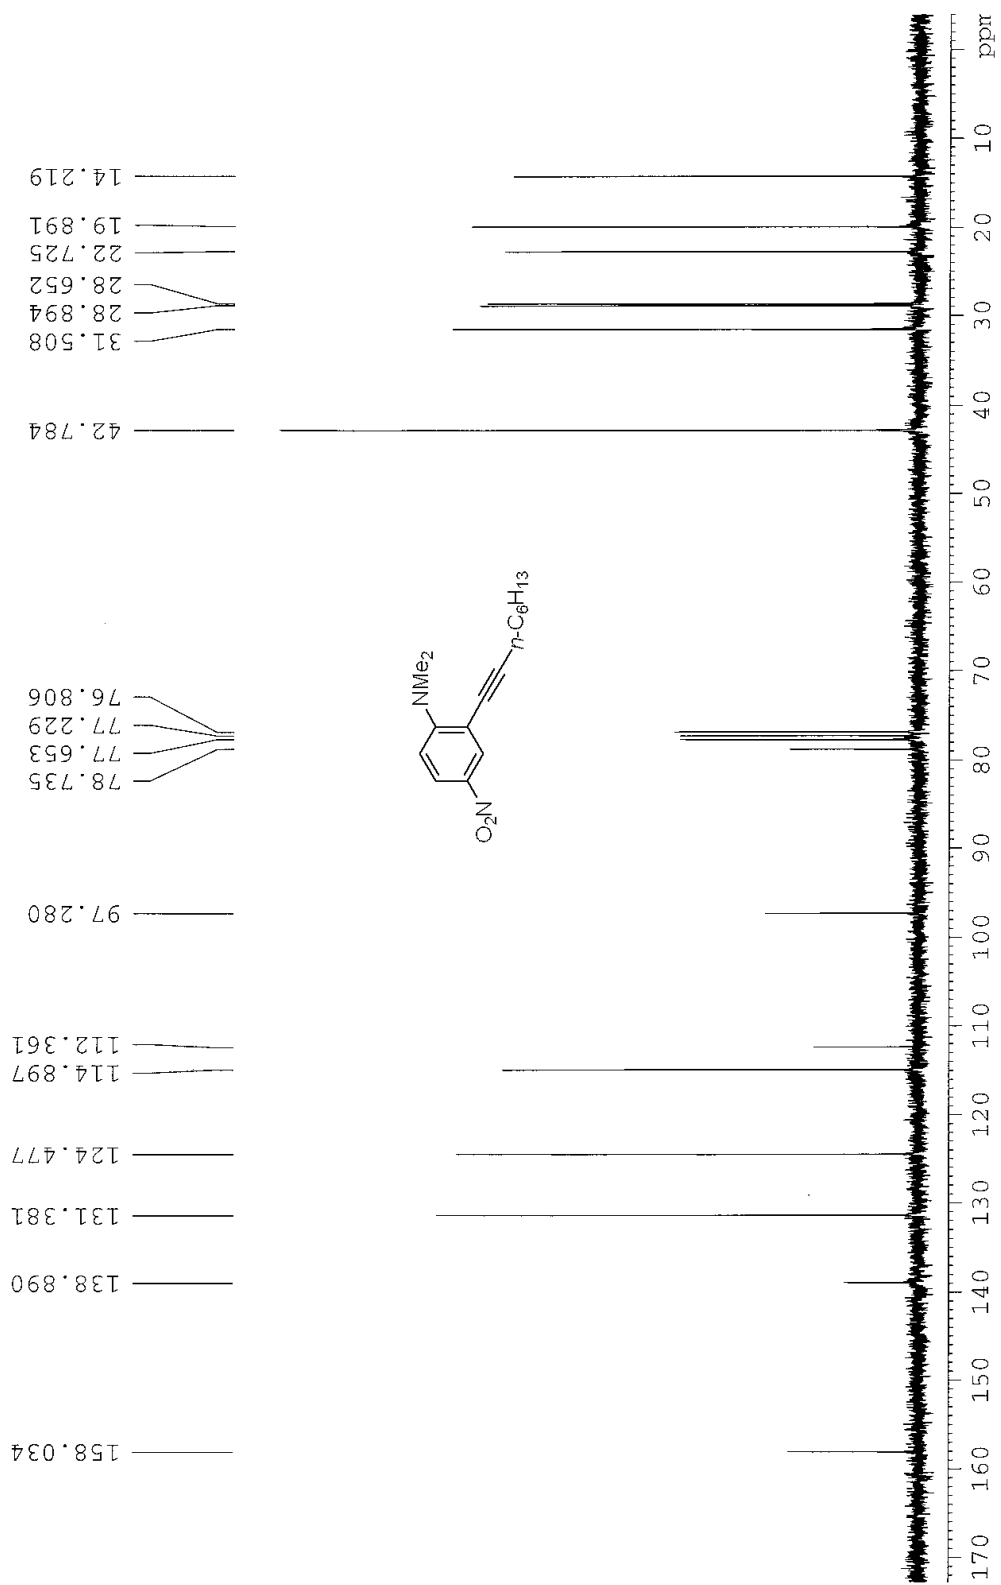

data/nmr300/dwy141c

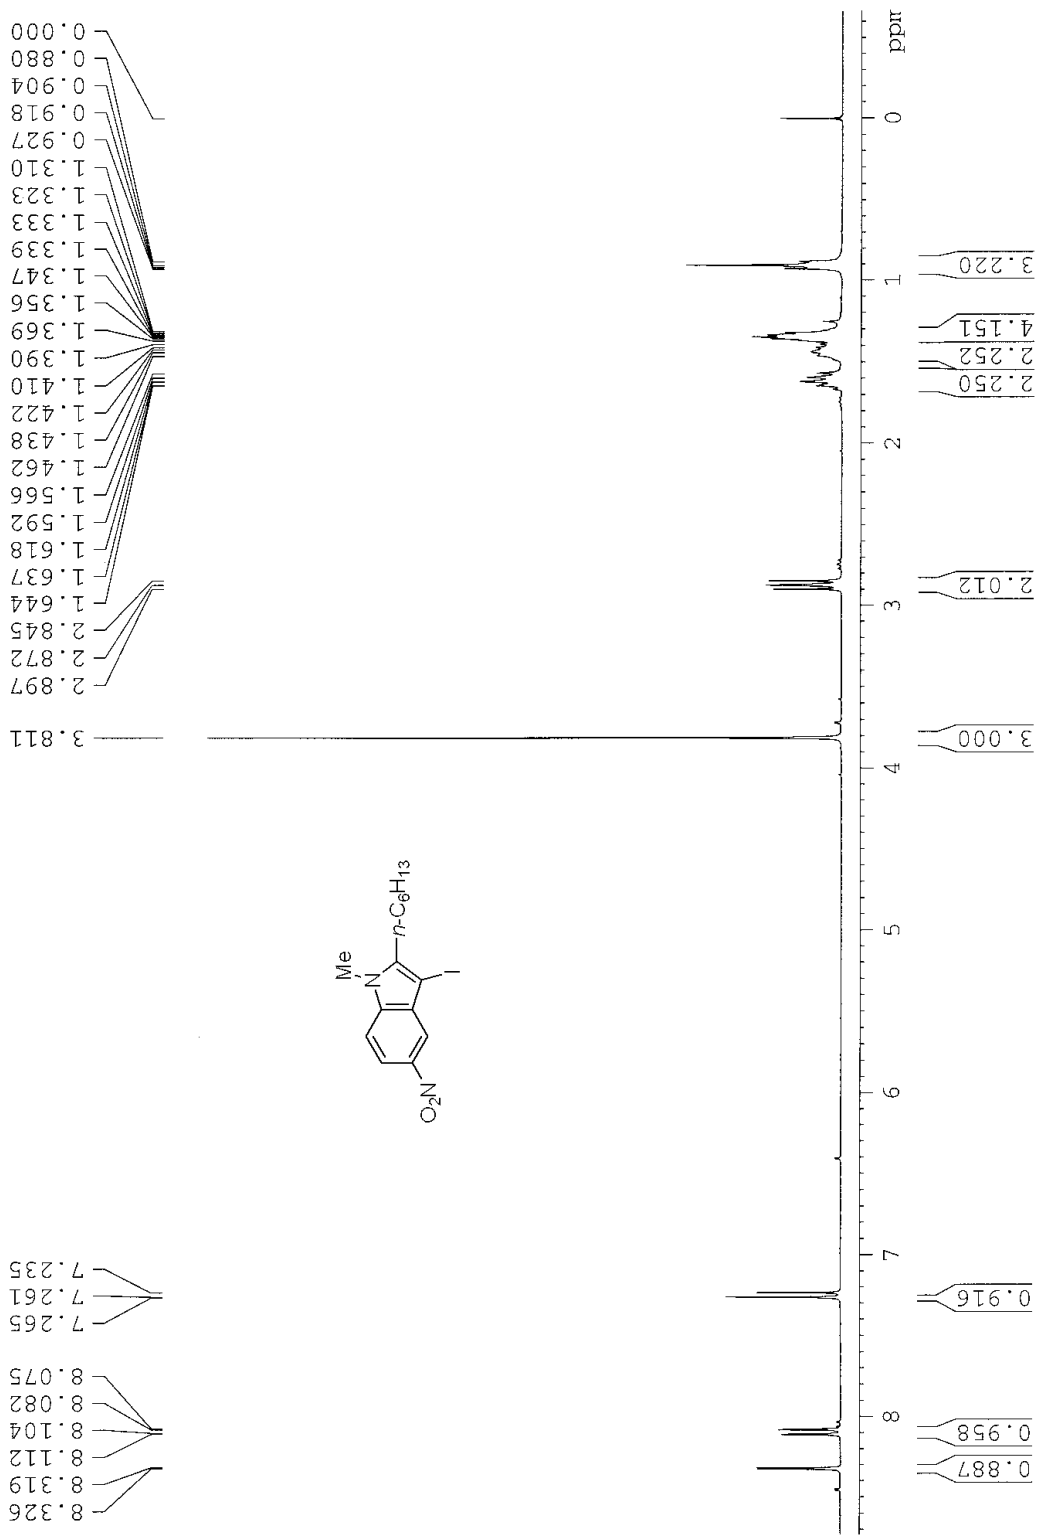

data/nmr300/dwy143





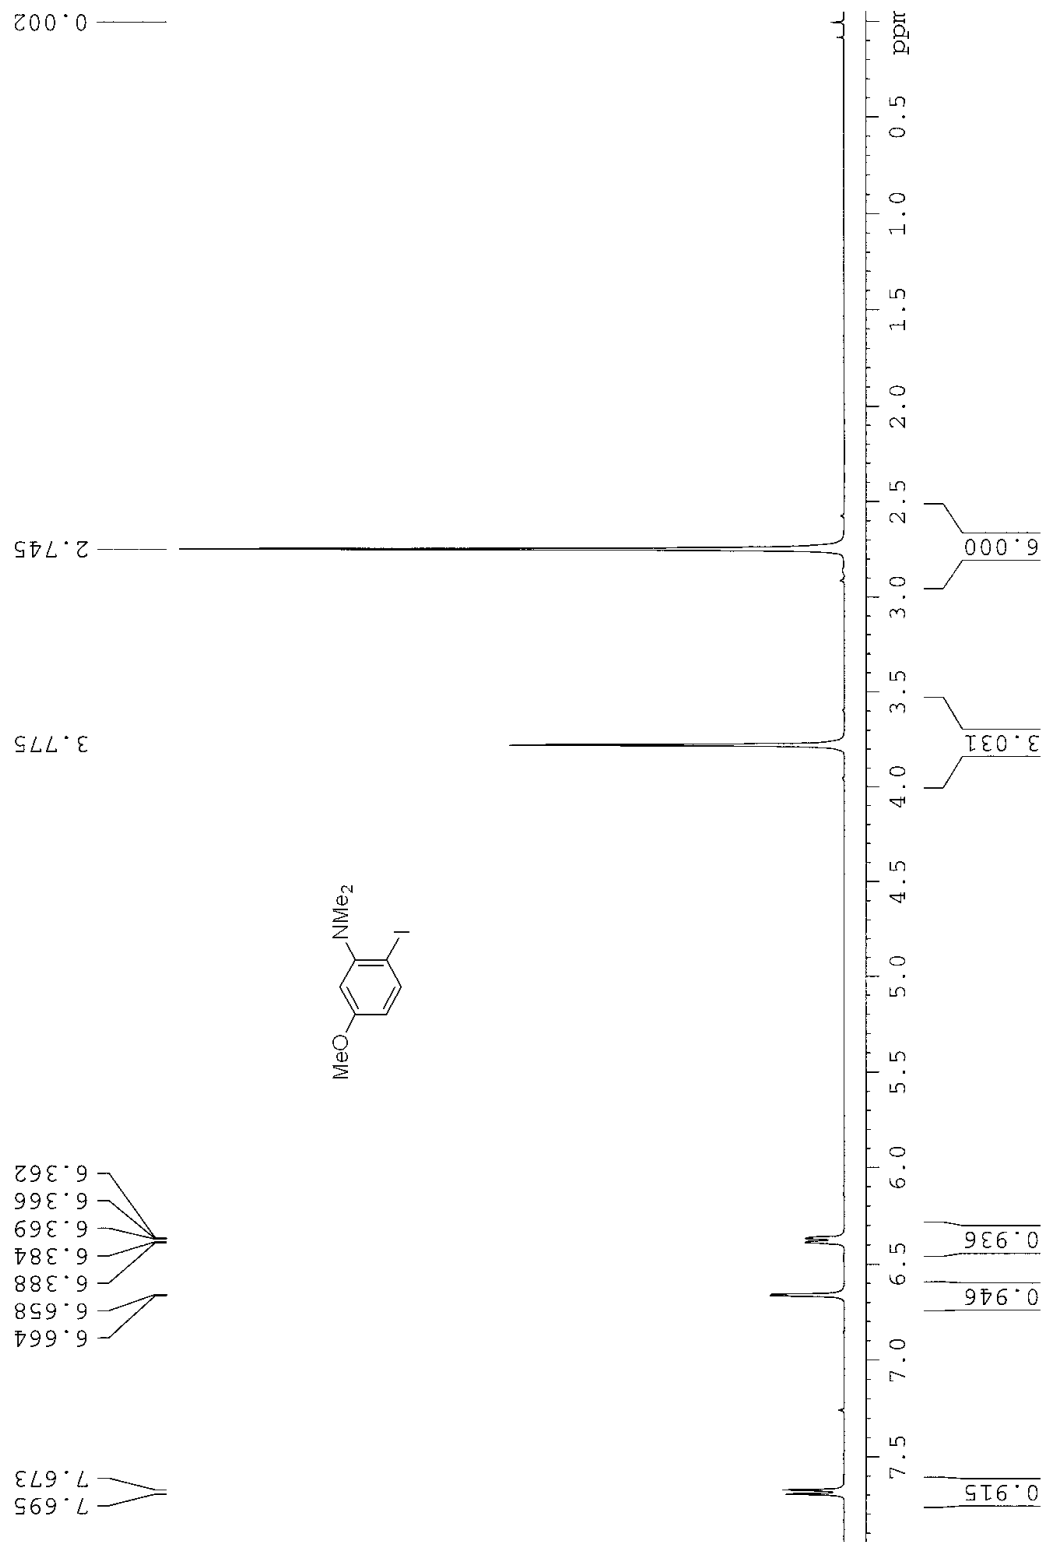

data/nmr400/dwyl160

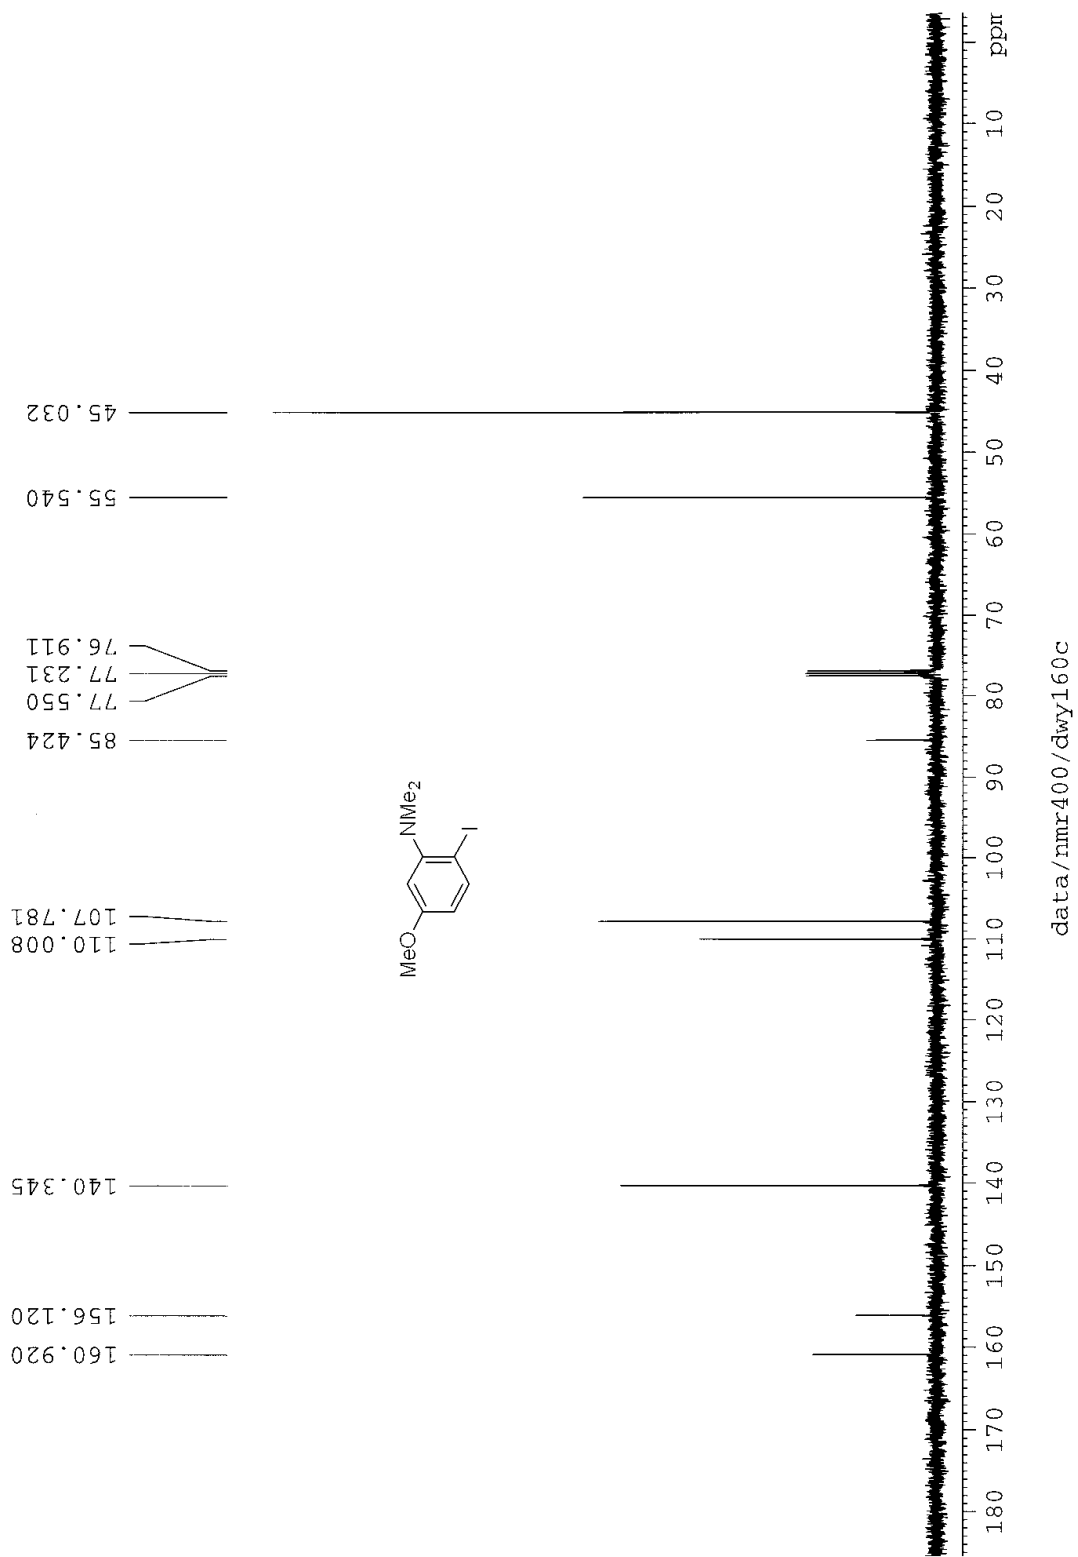

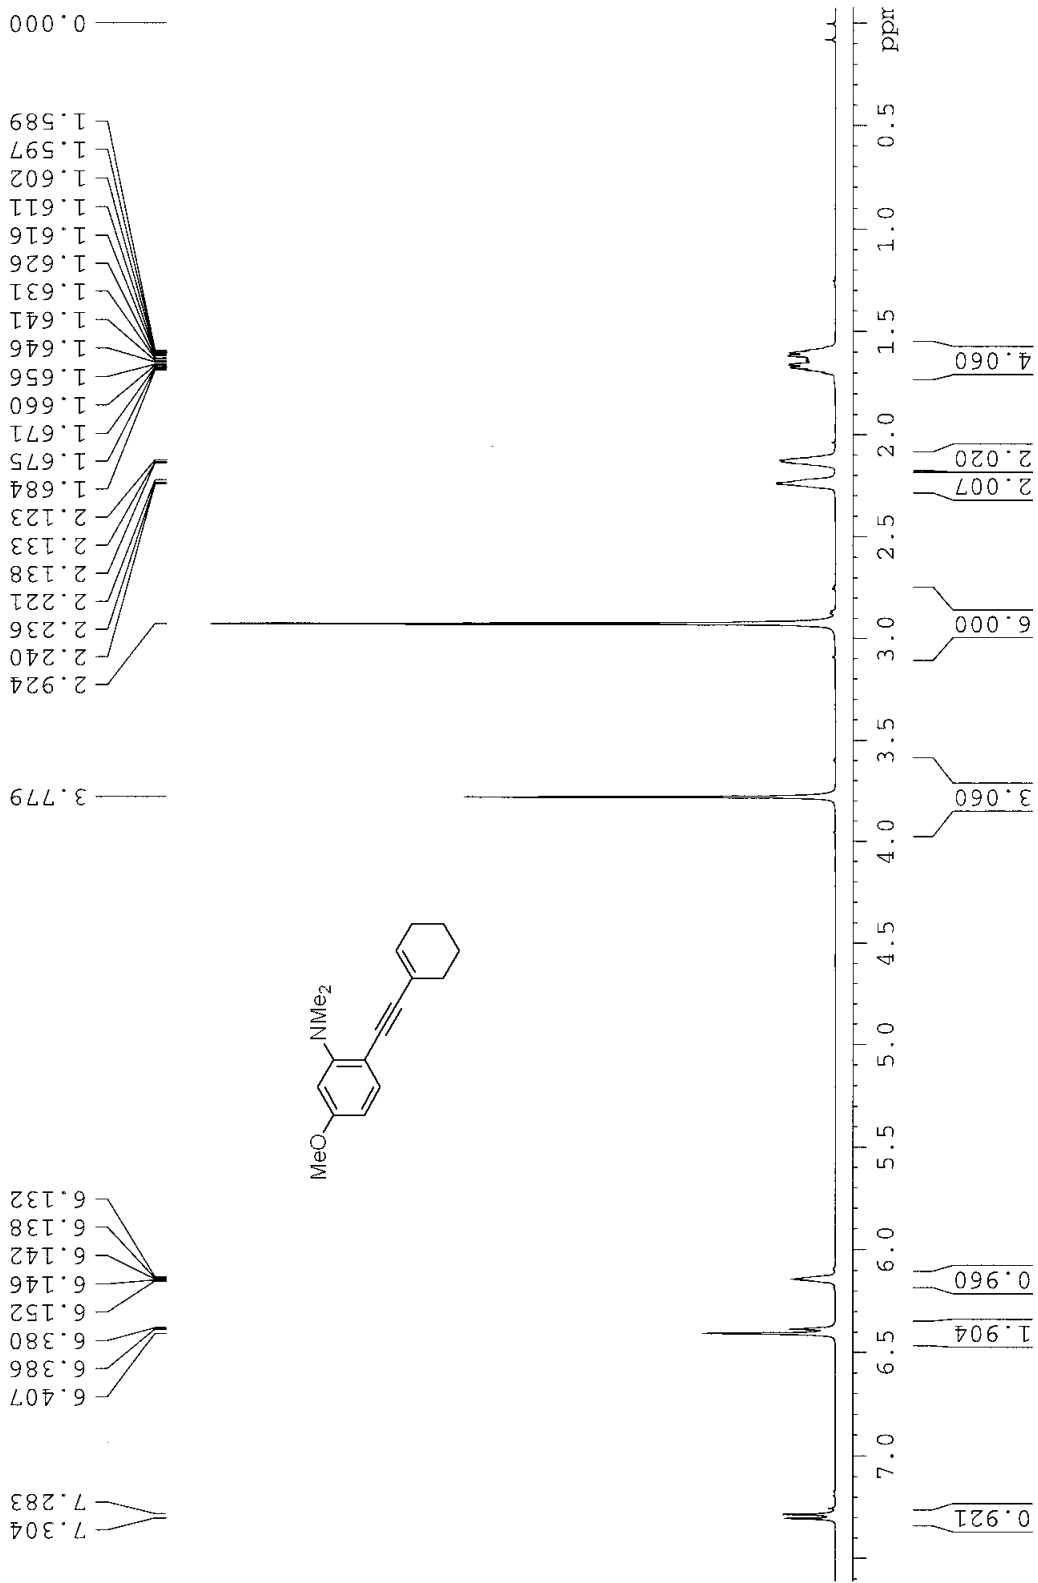

data/nmr400/dwy166

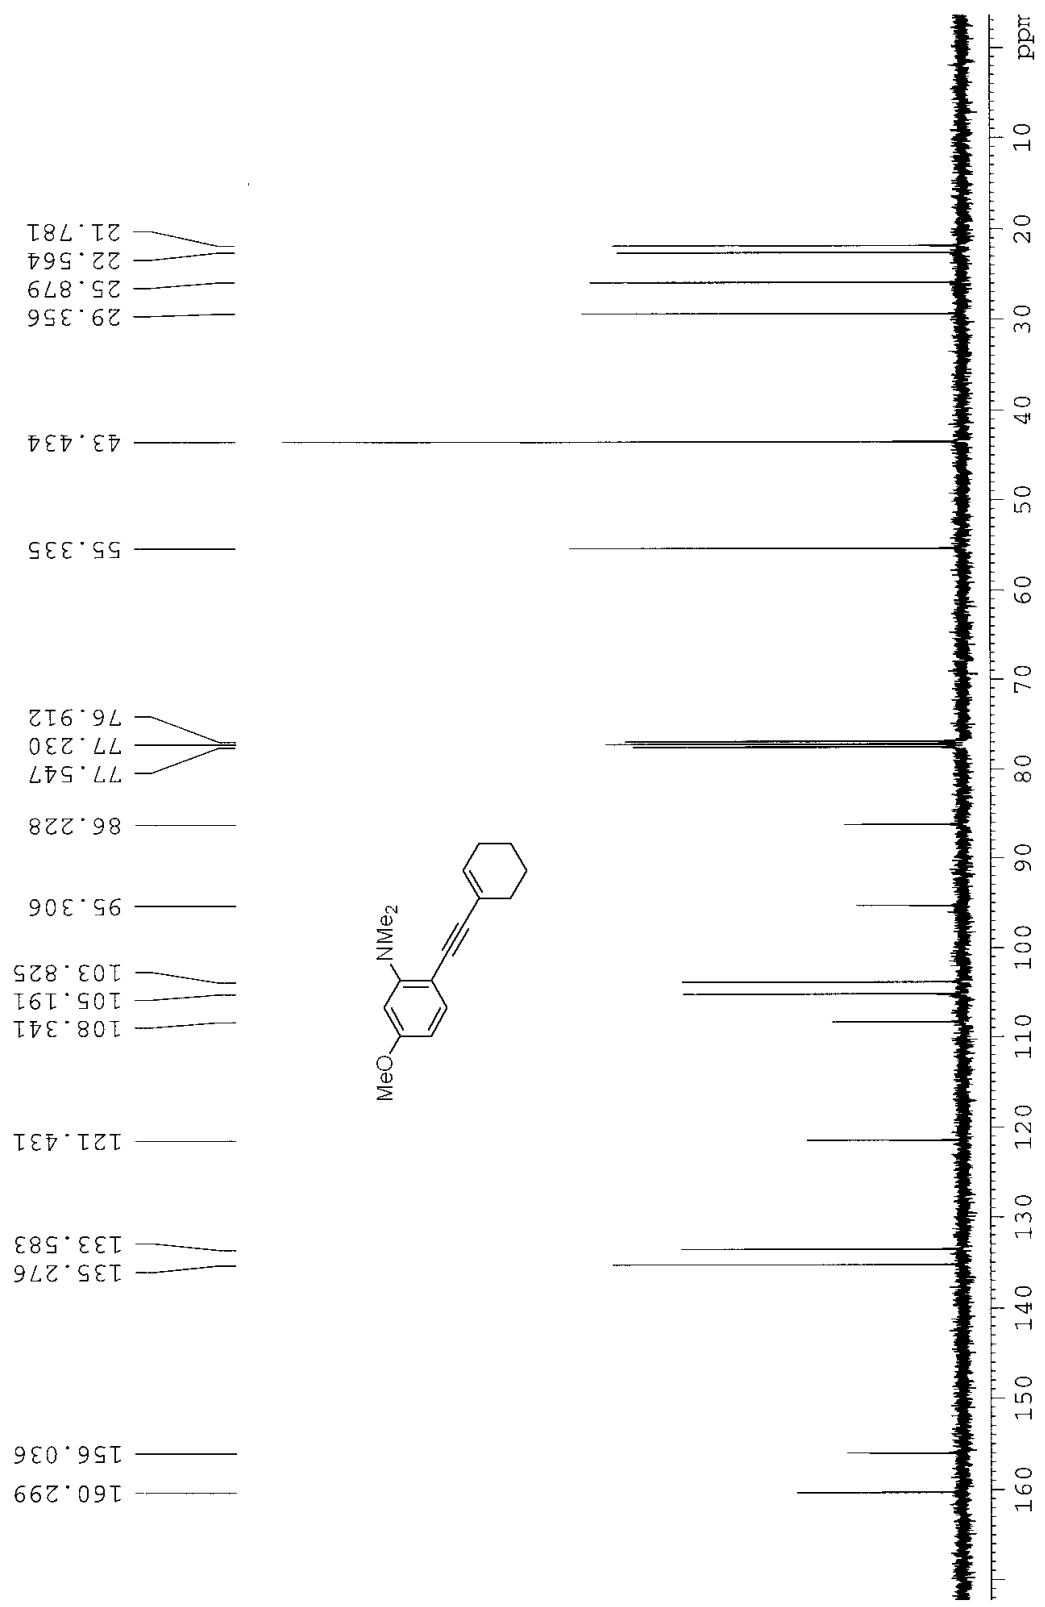

data/nmr400/dwy166c

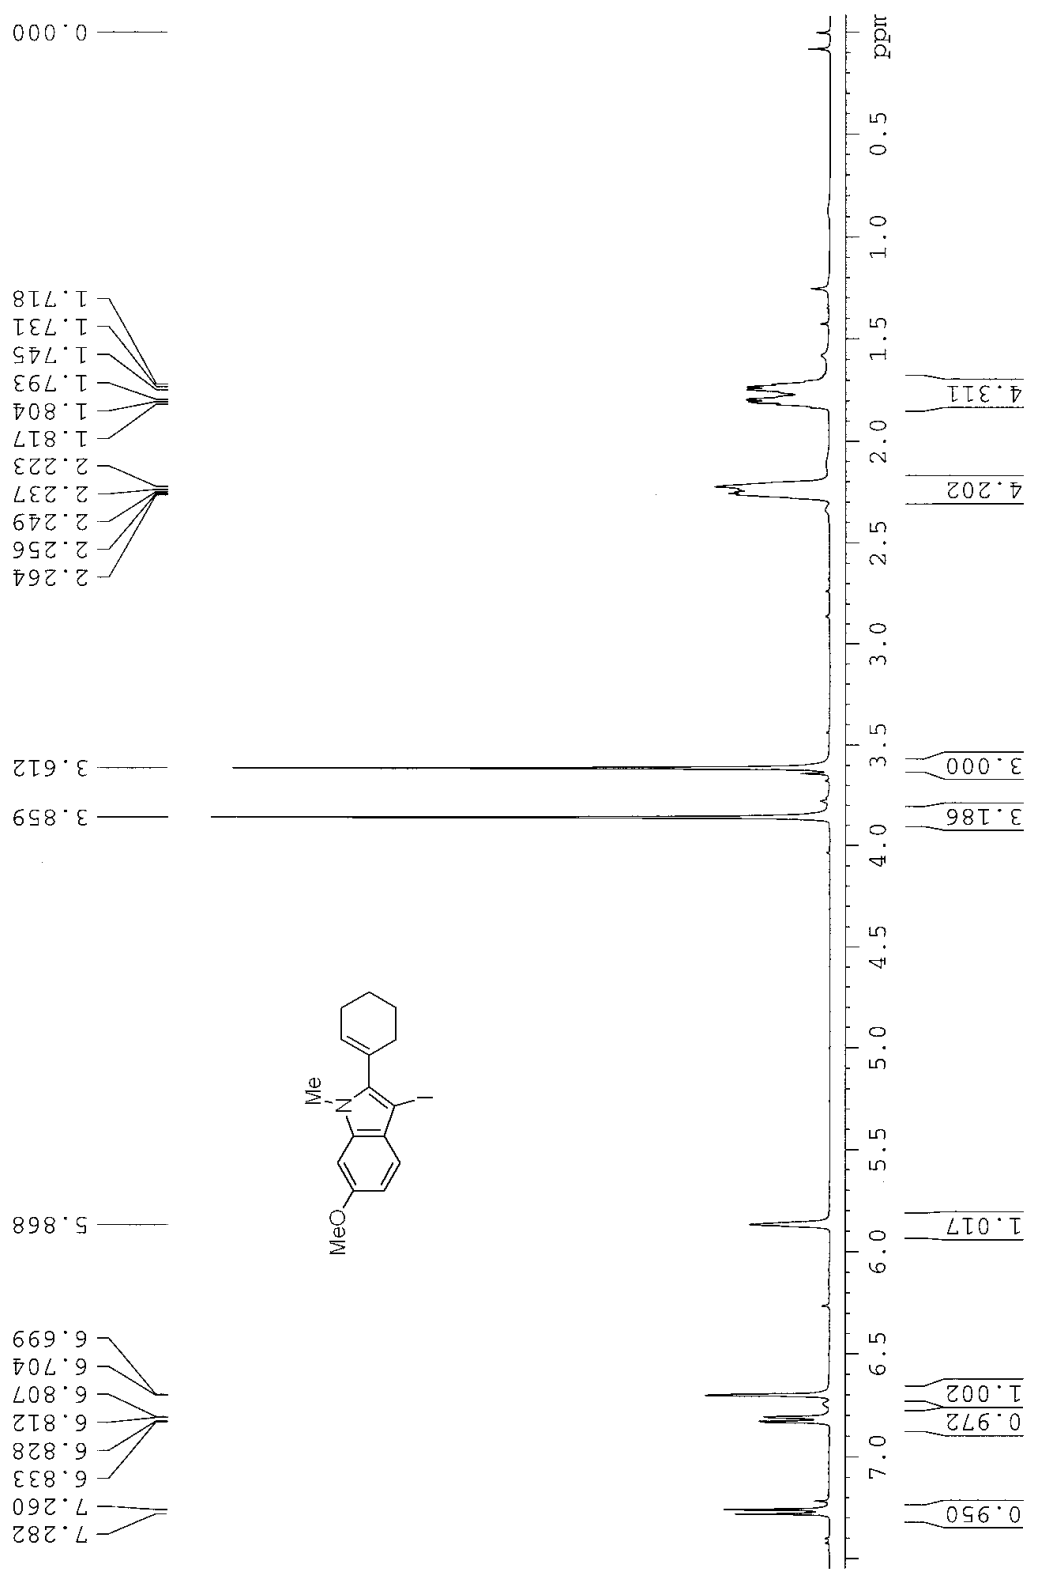

data/nmr400/dwy167

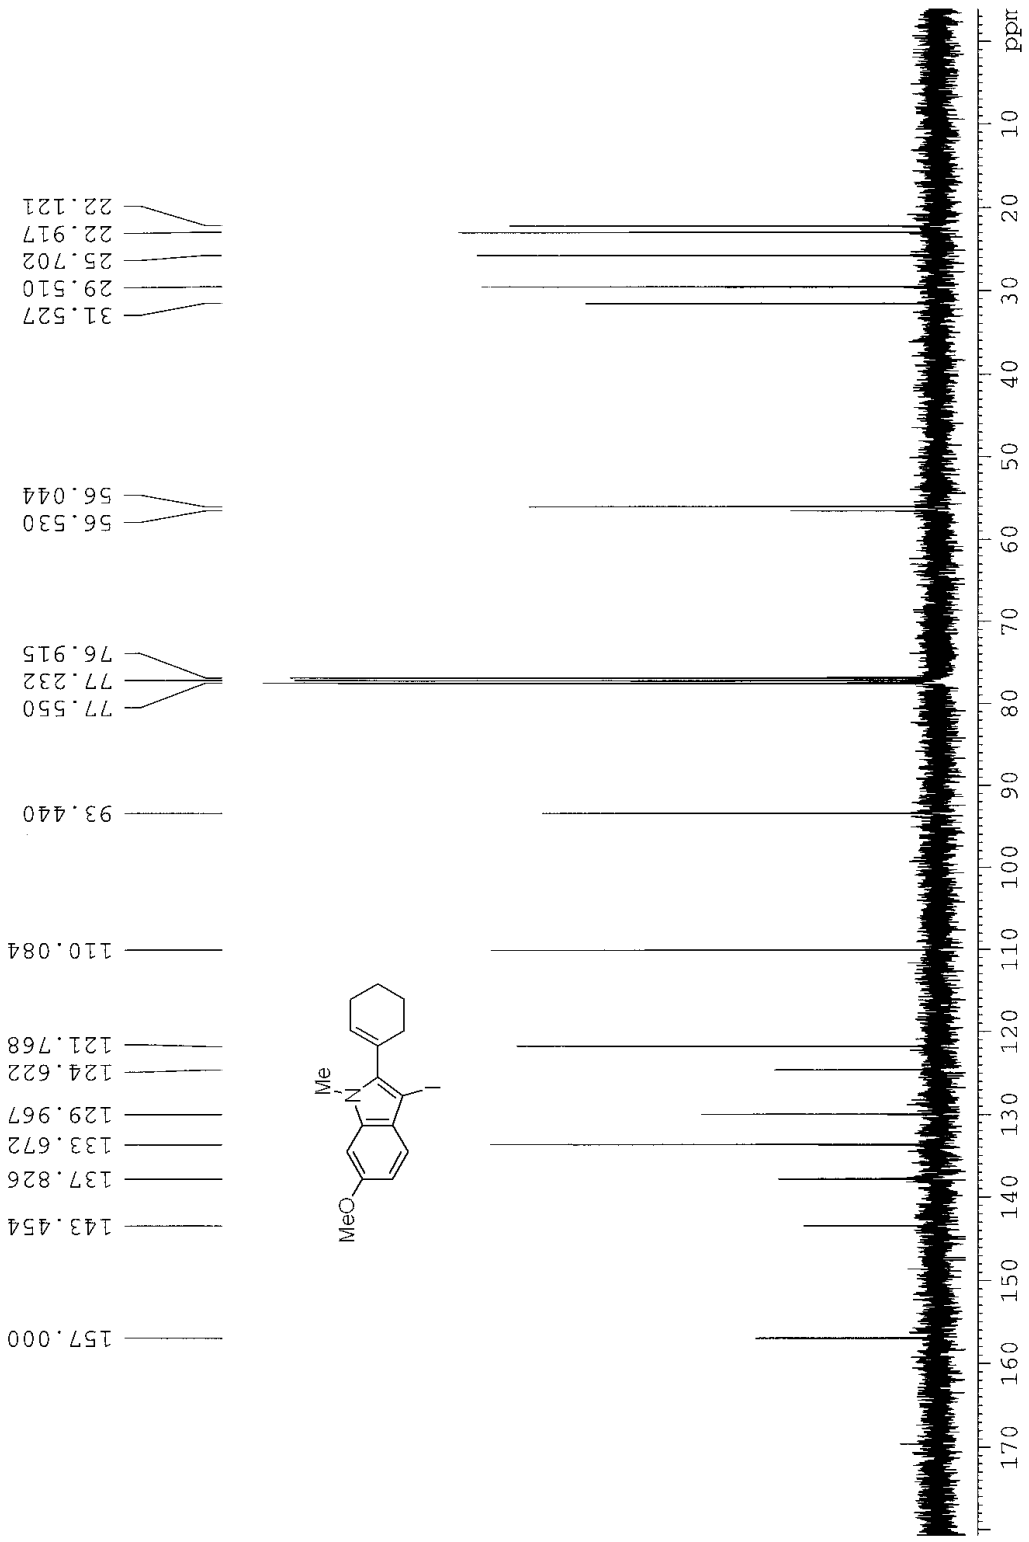

data/nmr400/dwy167c

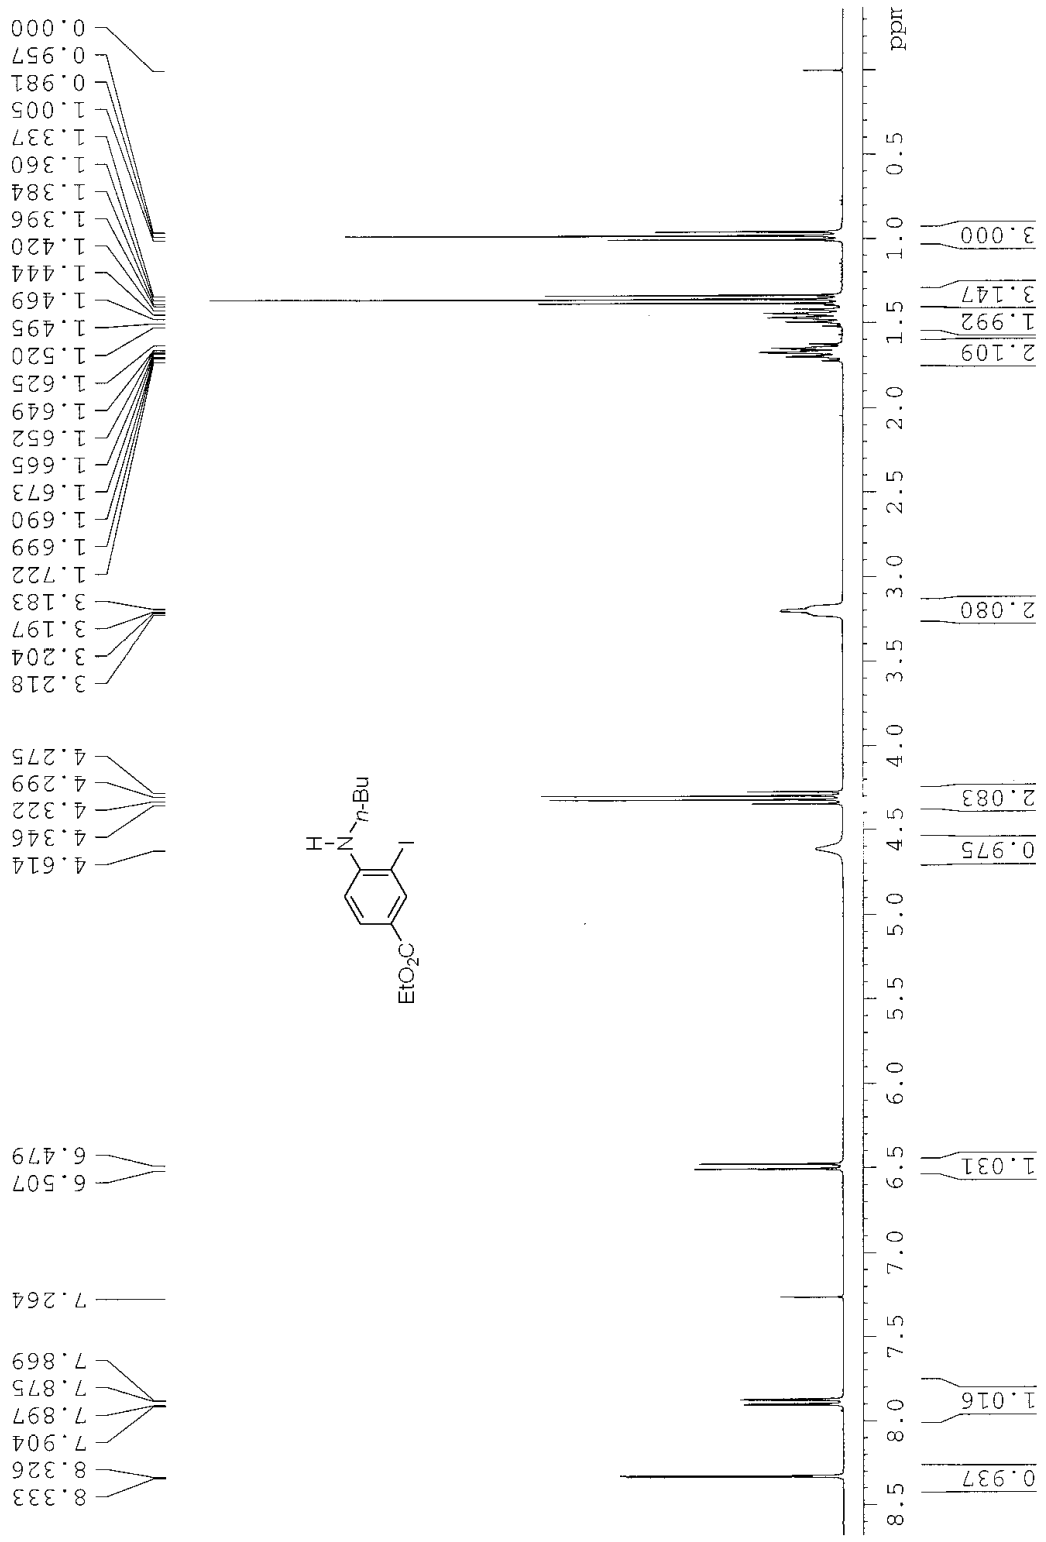

data/nmr300/dwy142



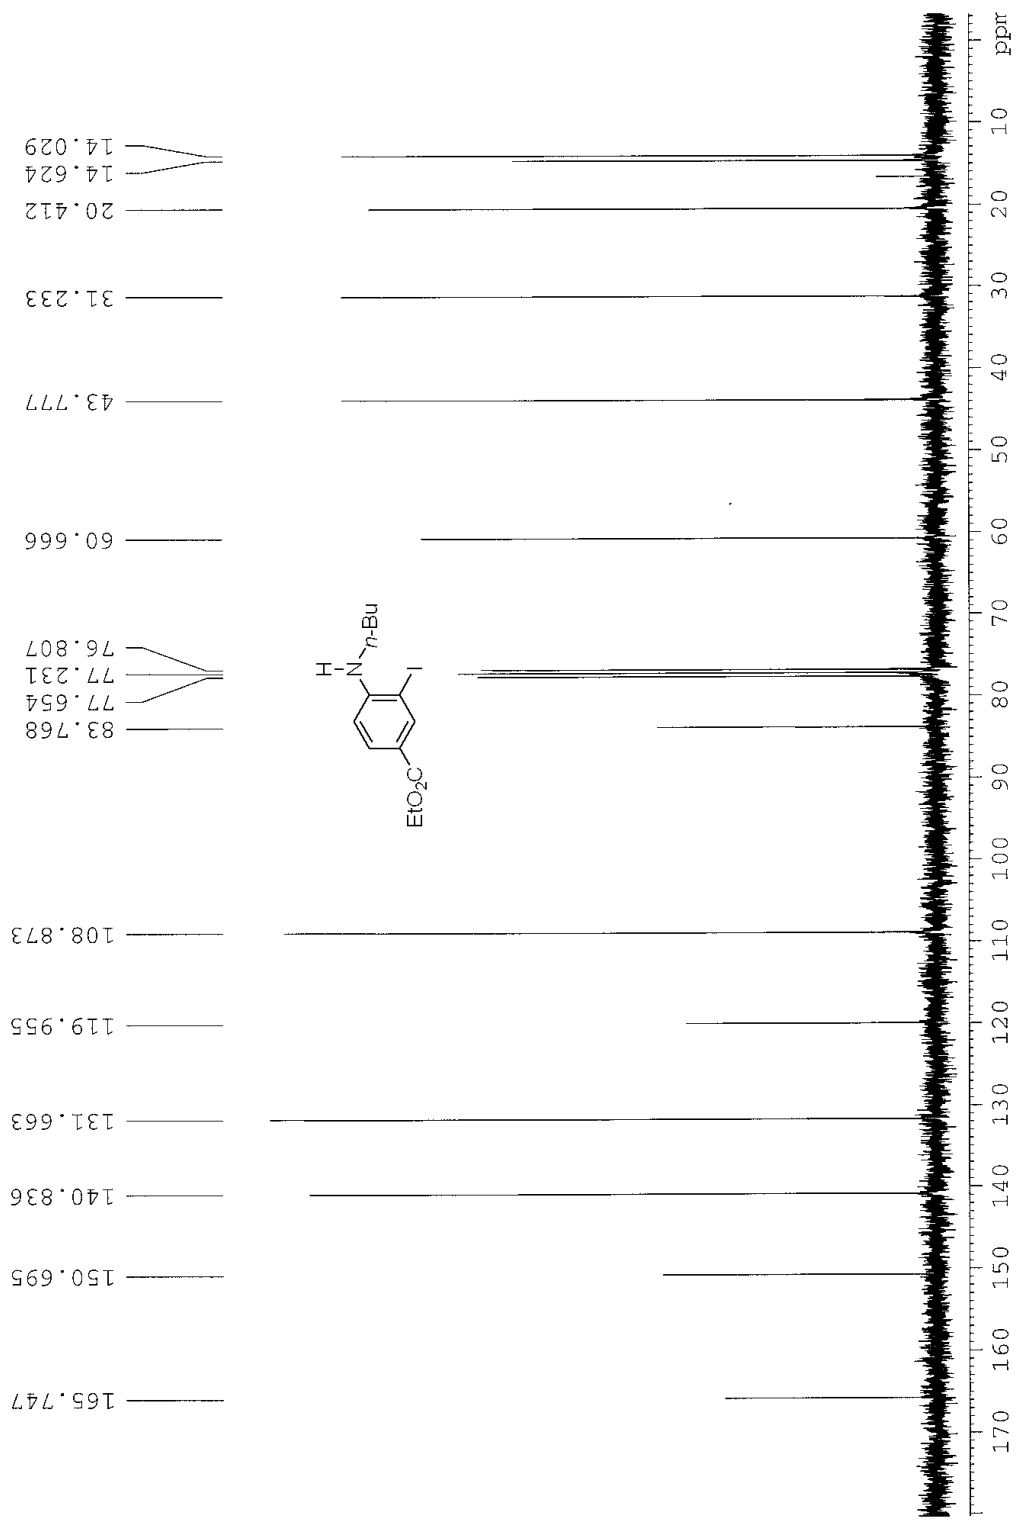

data/nmr300/dwy142c



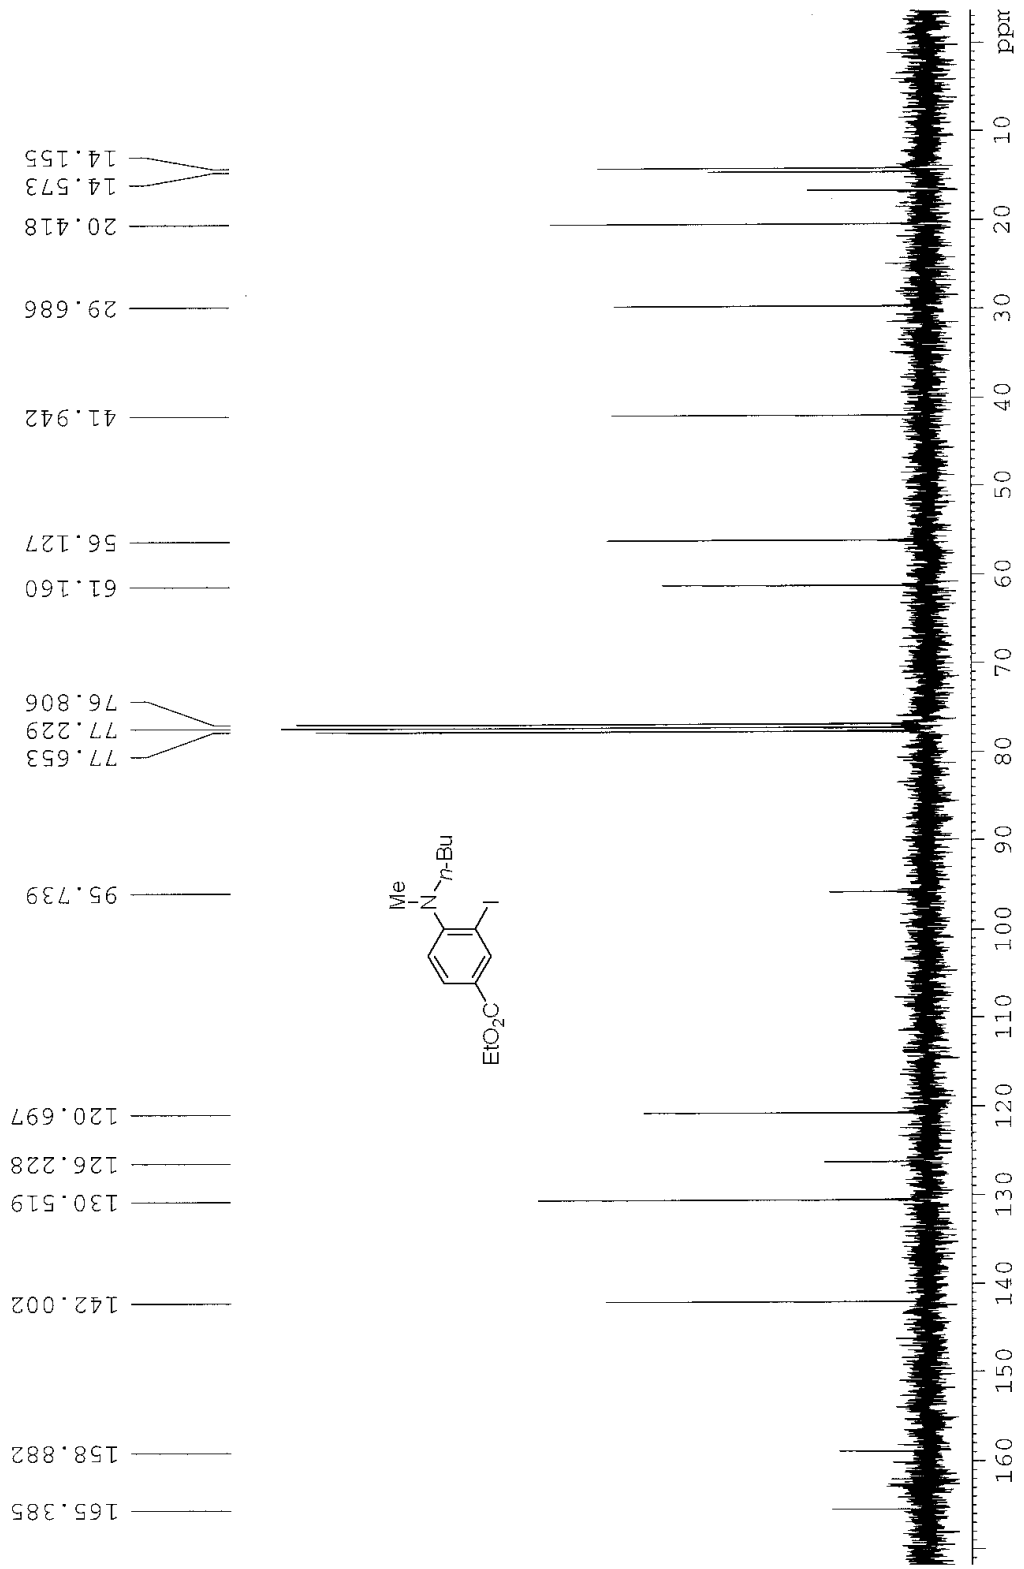

data/nmr300/dwy145c



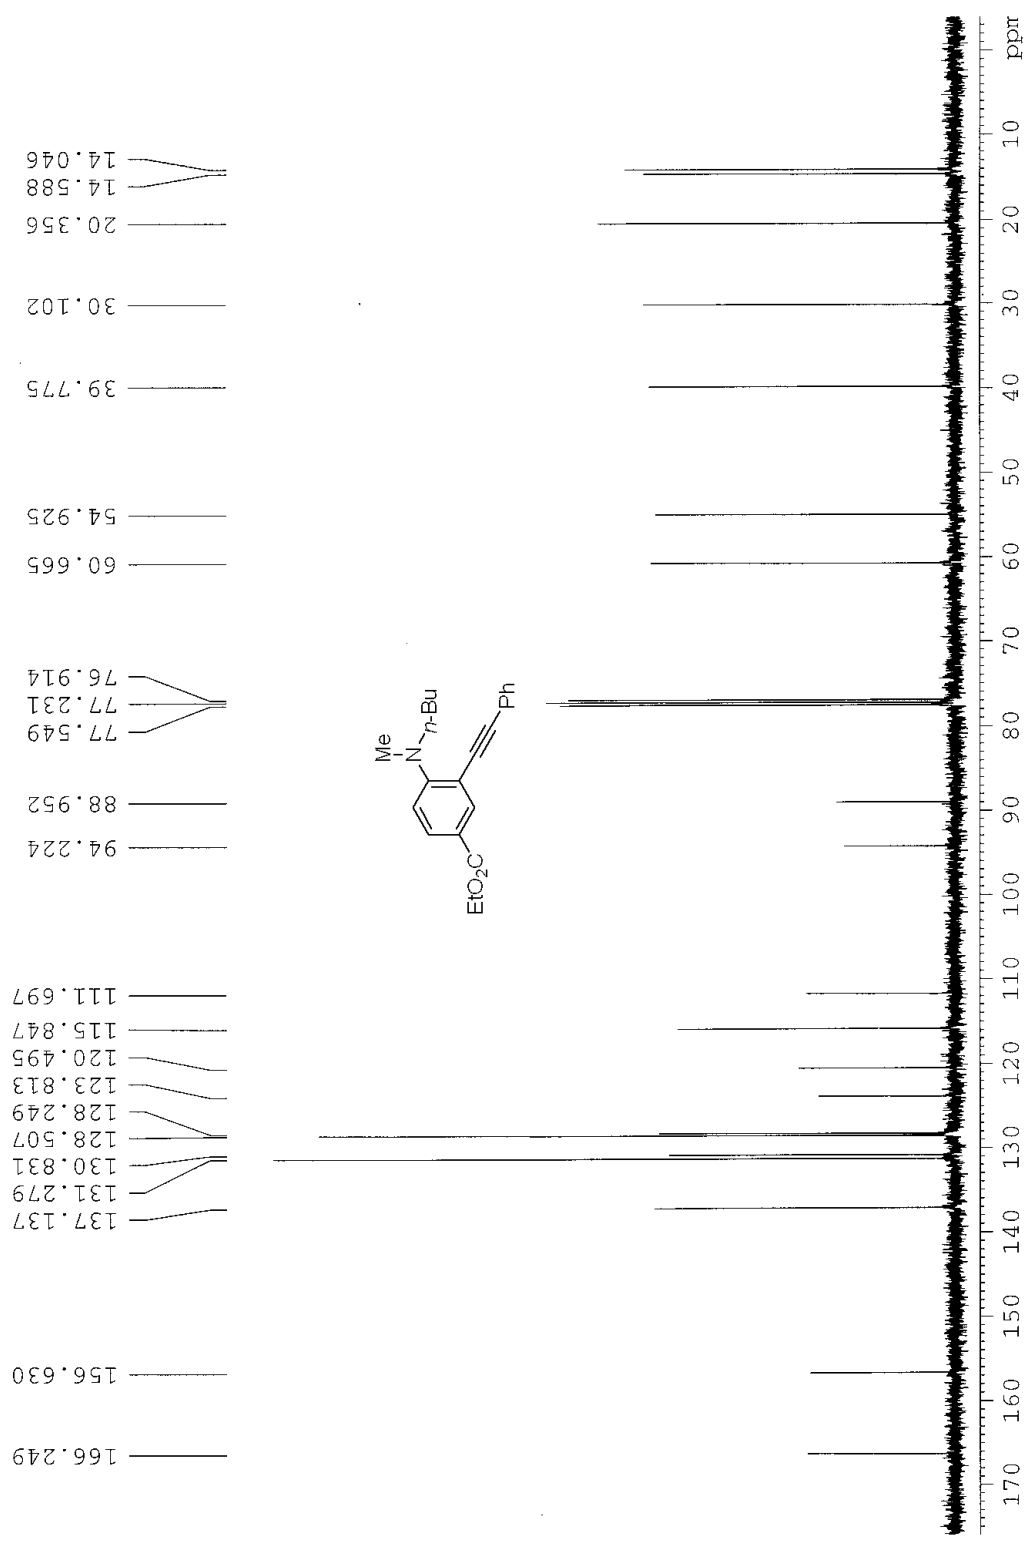

data/rmr400/dwy139c

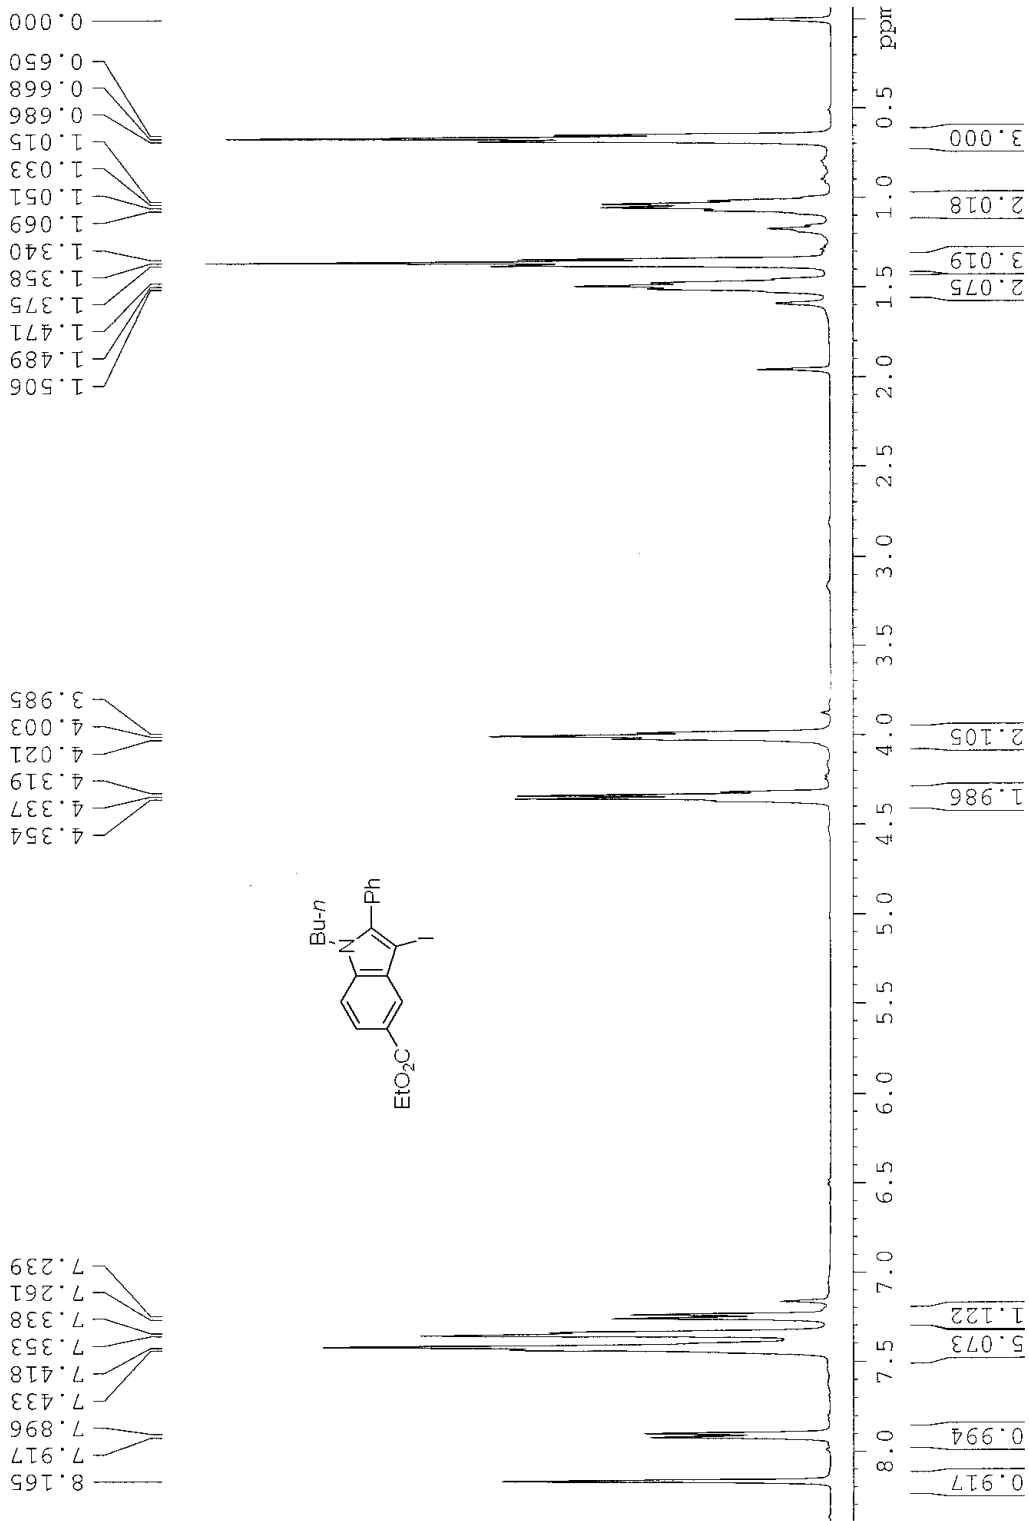

data/nmr400/dwy141

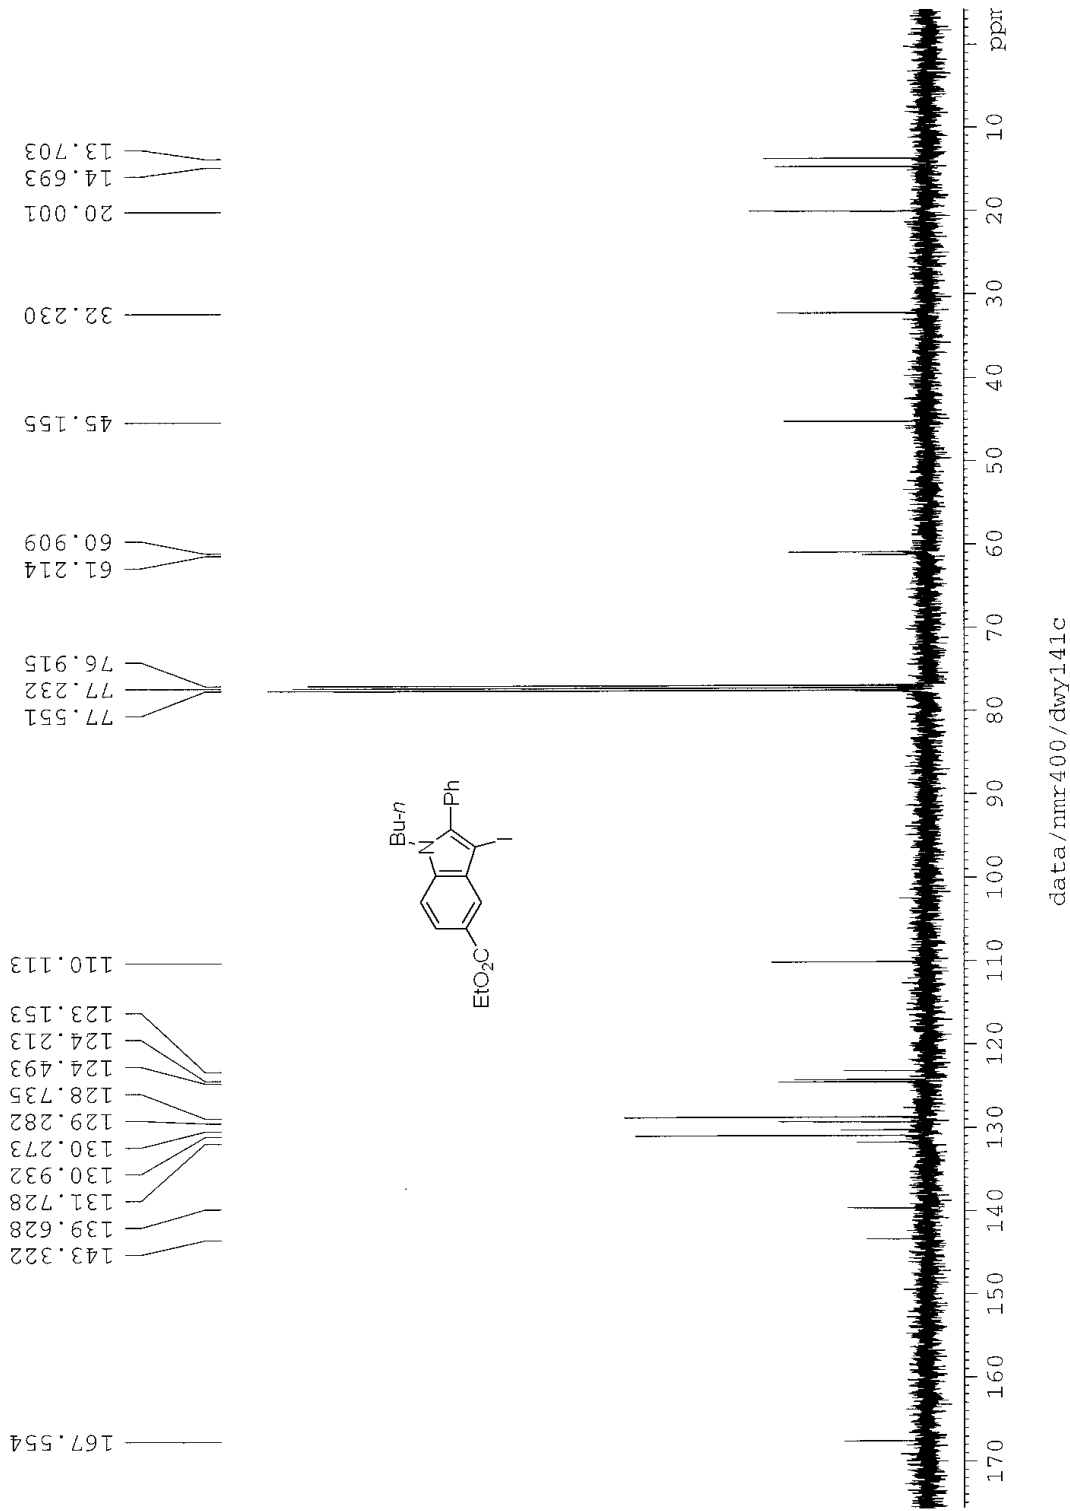

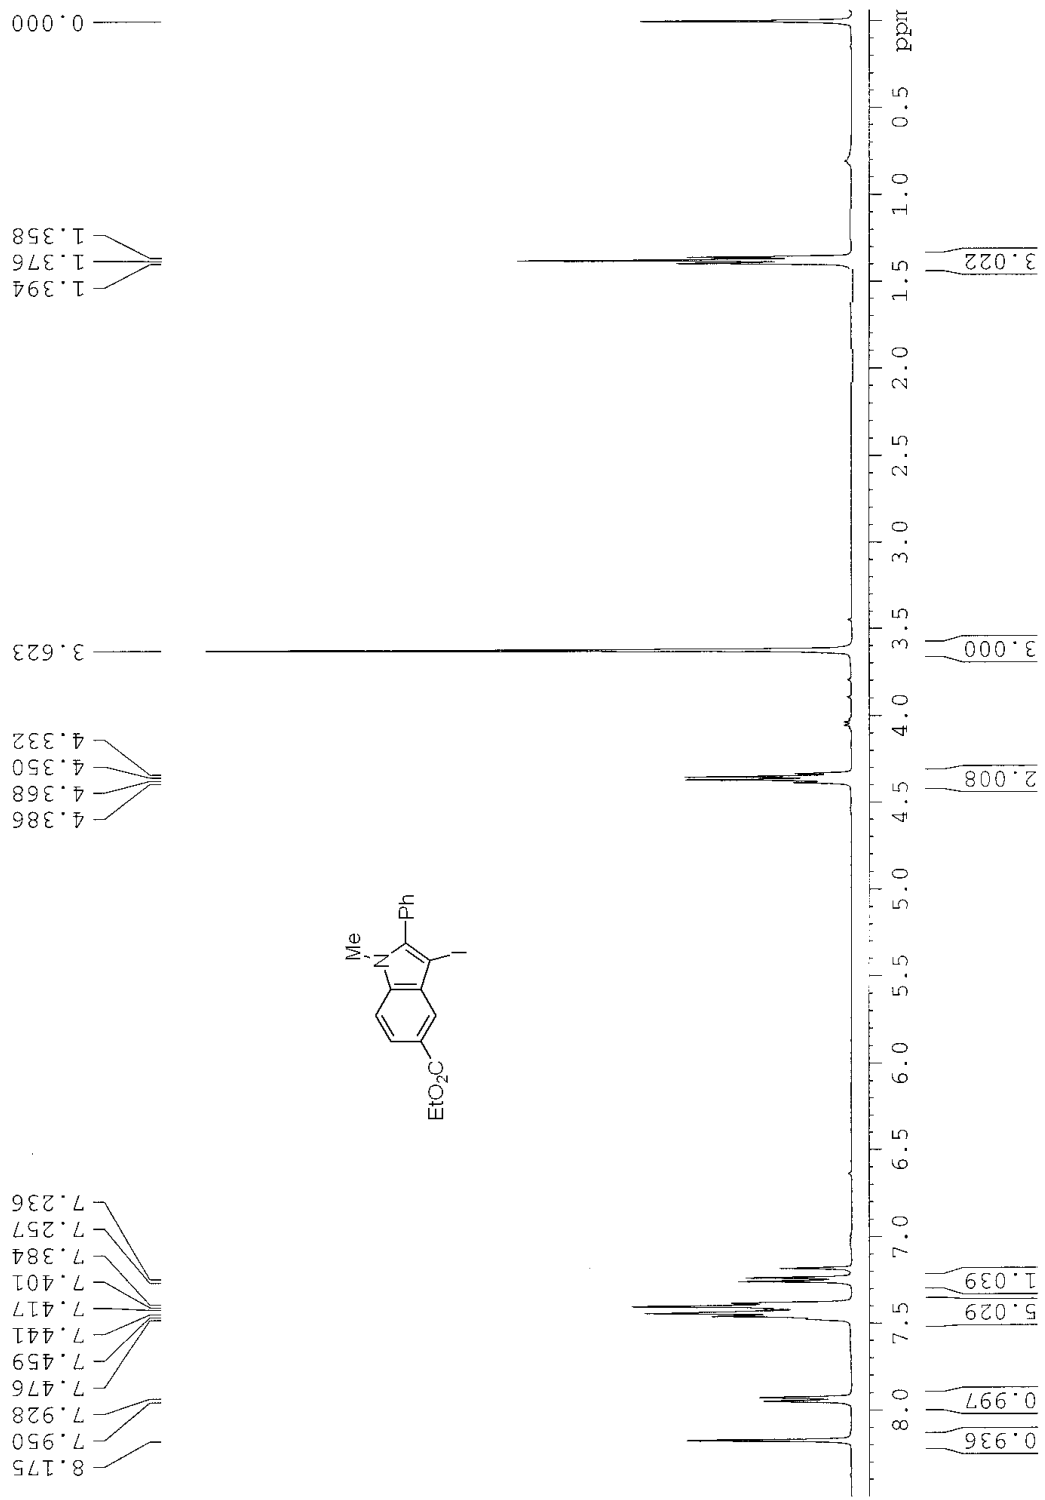

data/nmr400/dwy142



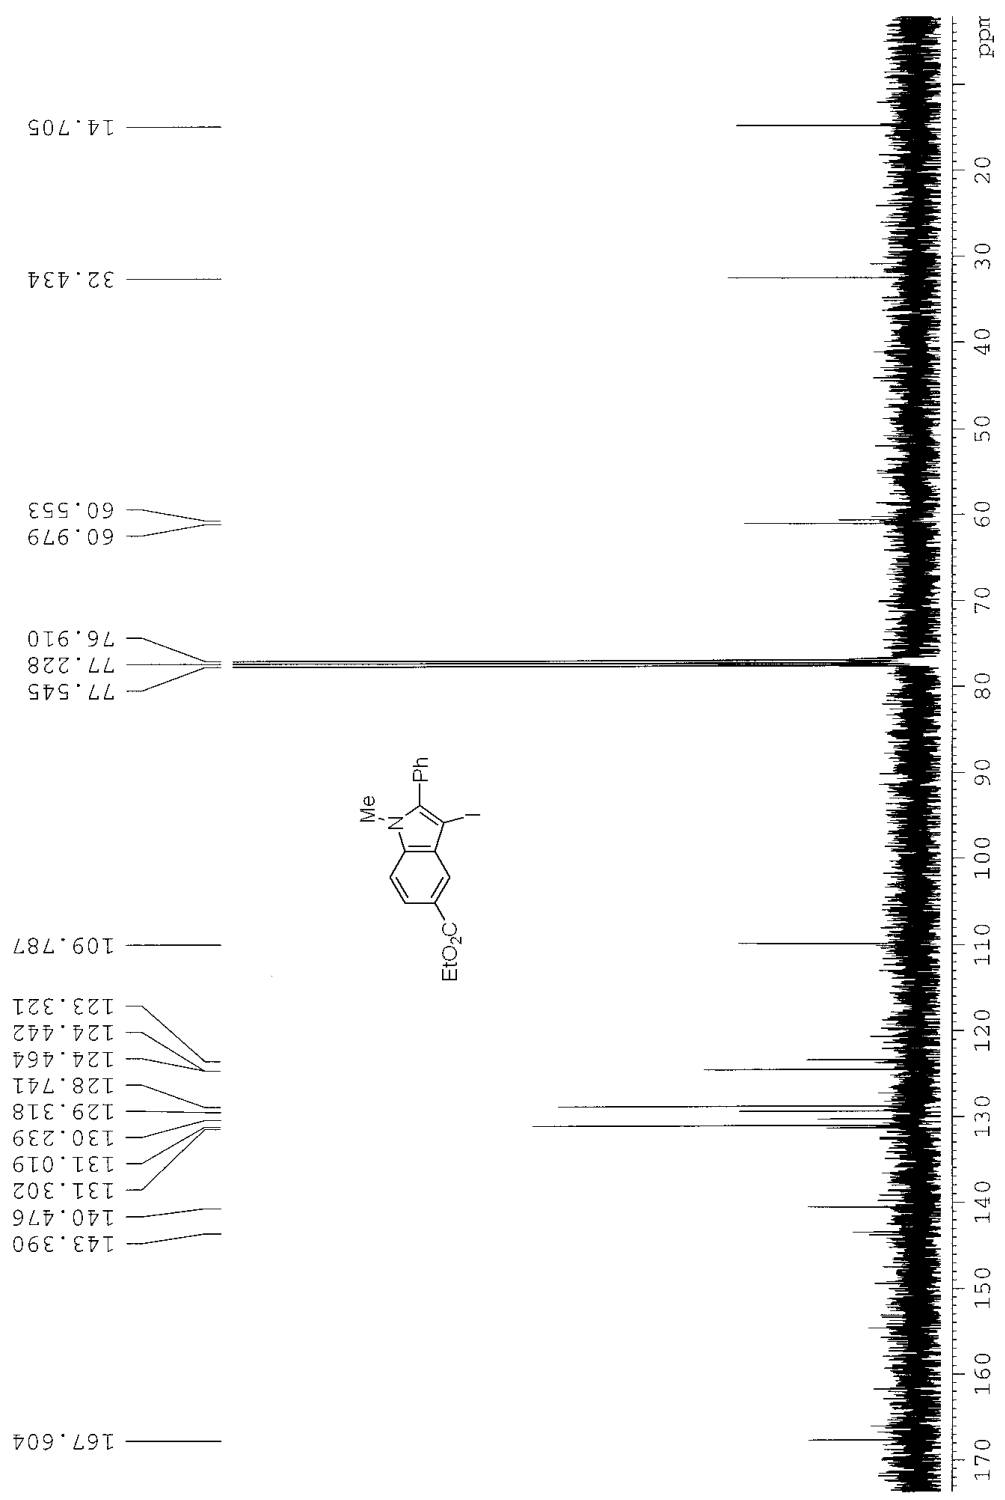

data/nmr400/dwy142c

0.000

3.678

7.866  
7.863  
7.841  
7.836  
7.834  
7.663  
7.658  
7.640  
7.635  
7.631  
7.520  
7.516  
7.492  
7.467  
7.438  
7.435  
7.433  
7.411  
7.406  
7.309  
7.287  
7.282  
7.266  
7.262  
7.258  
7.241  
7.234  
7.232  
7.210  
7.209

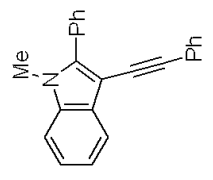

1.000  
2.067  
2.205  
3.035  
6.492

ppm

data/nmr300/dwy161

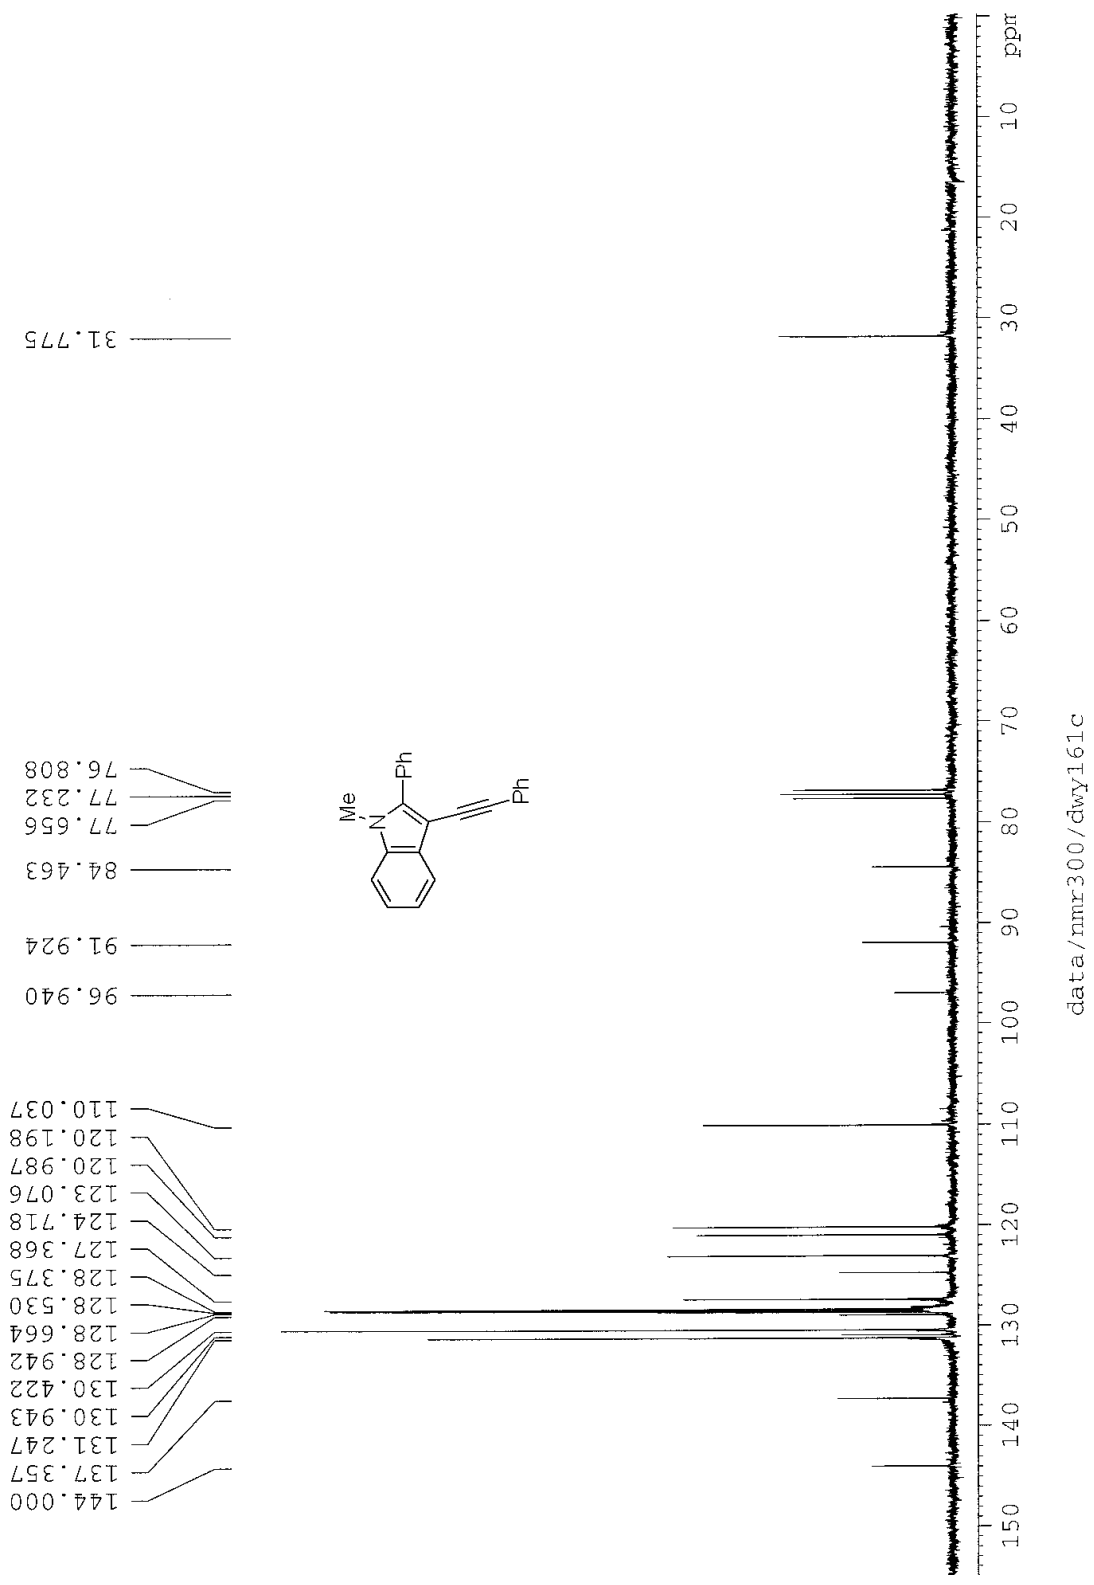

0.000

3.669

7.160  
7.163  
7.184  
7.187  
7.190  
7.259  
7.261  
7.274  
7.282  
7.285  
7.288  
7.293  
7.301  
7.322  
7.325  
7.329  
7.335  
7.357  
7.359  
7.364  
7.394  
7.783  
7.784  
7.807  
7.809  
7.811  
7.813

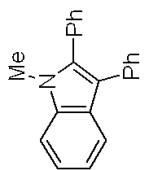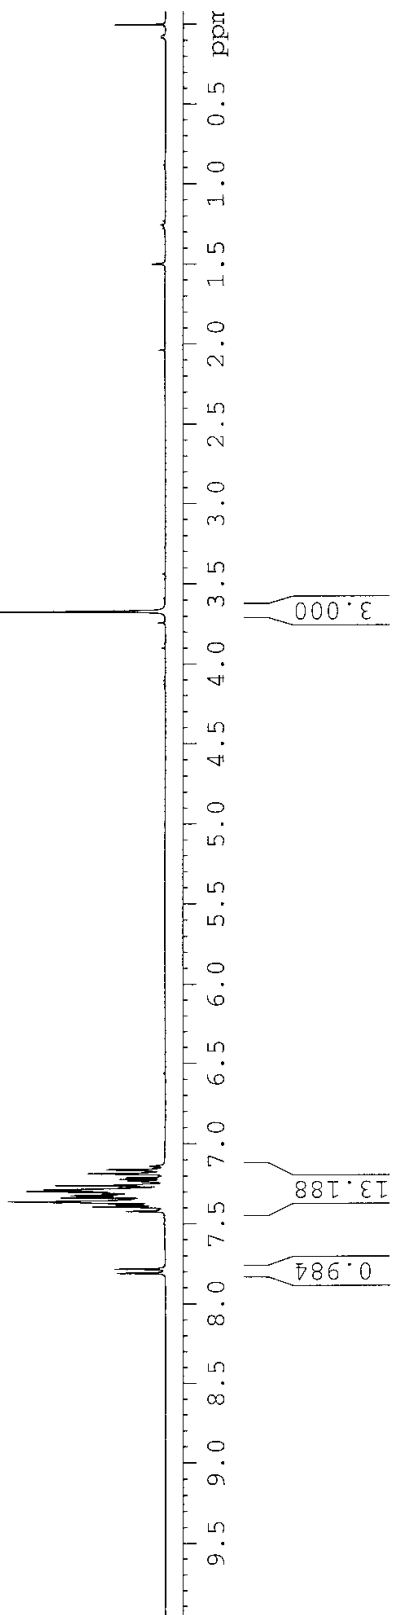

data/nmr300/dwy163

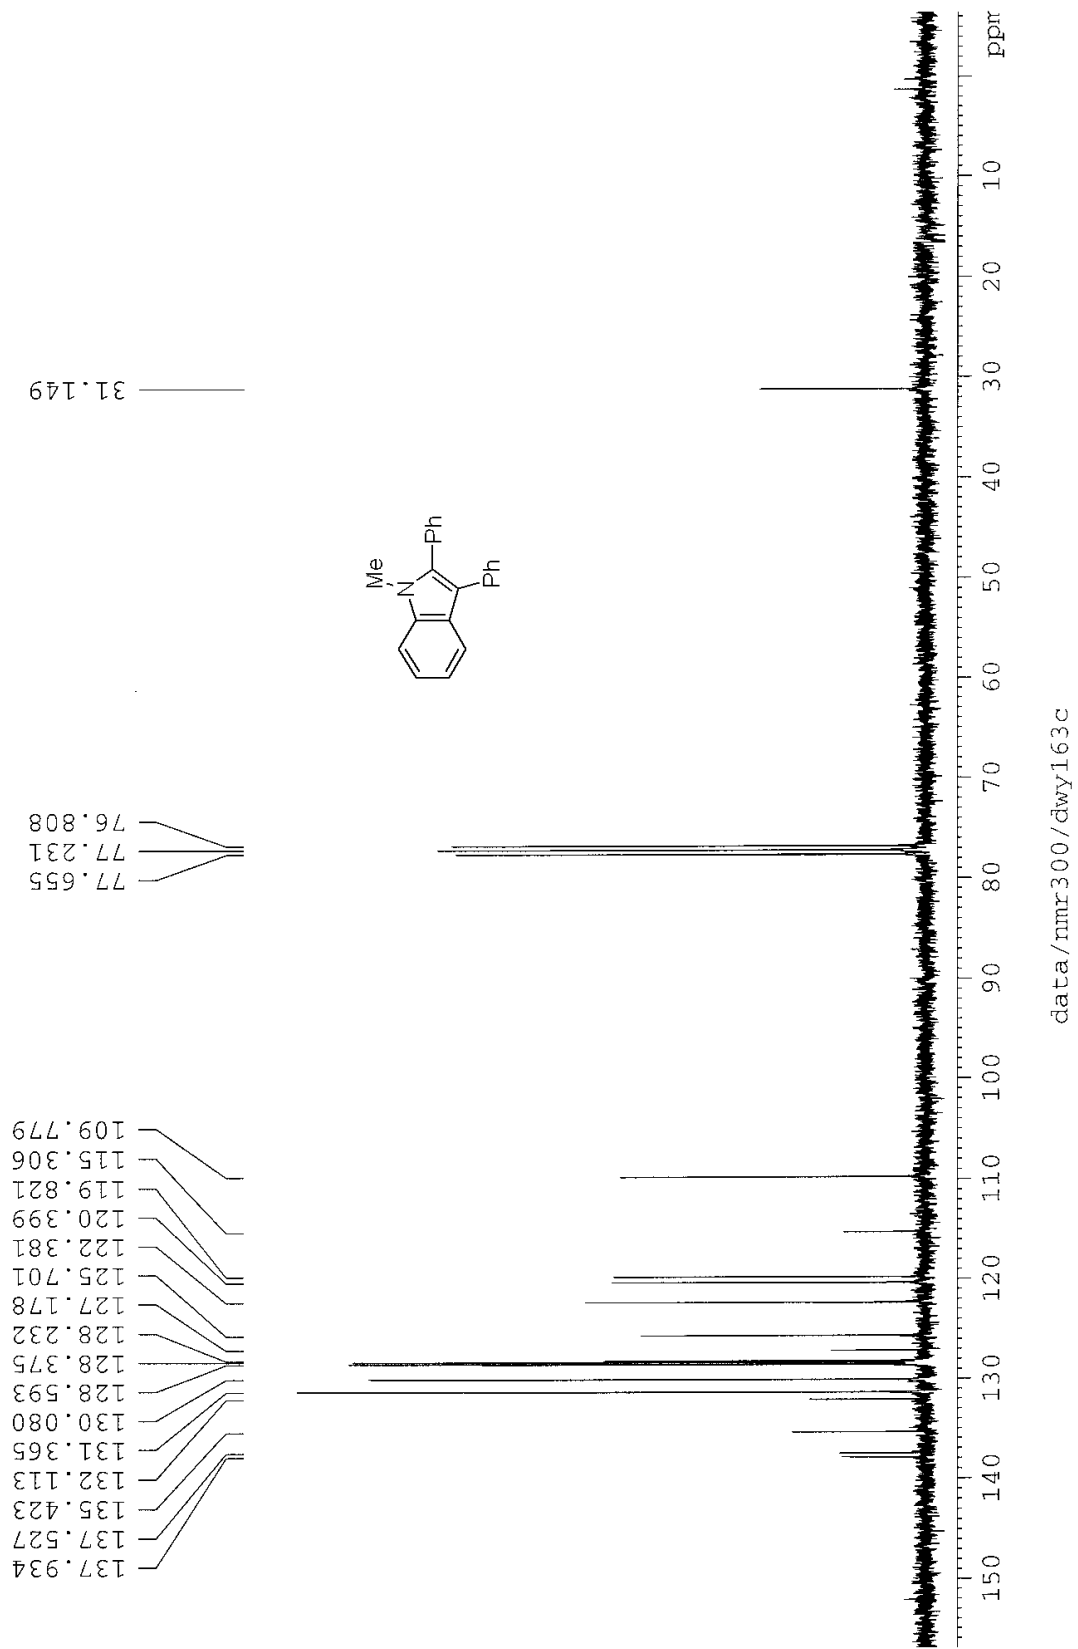

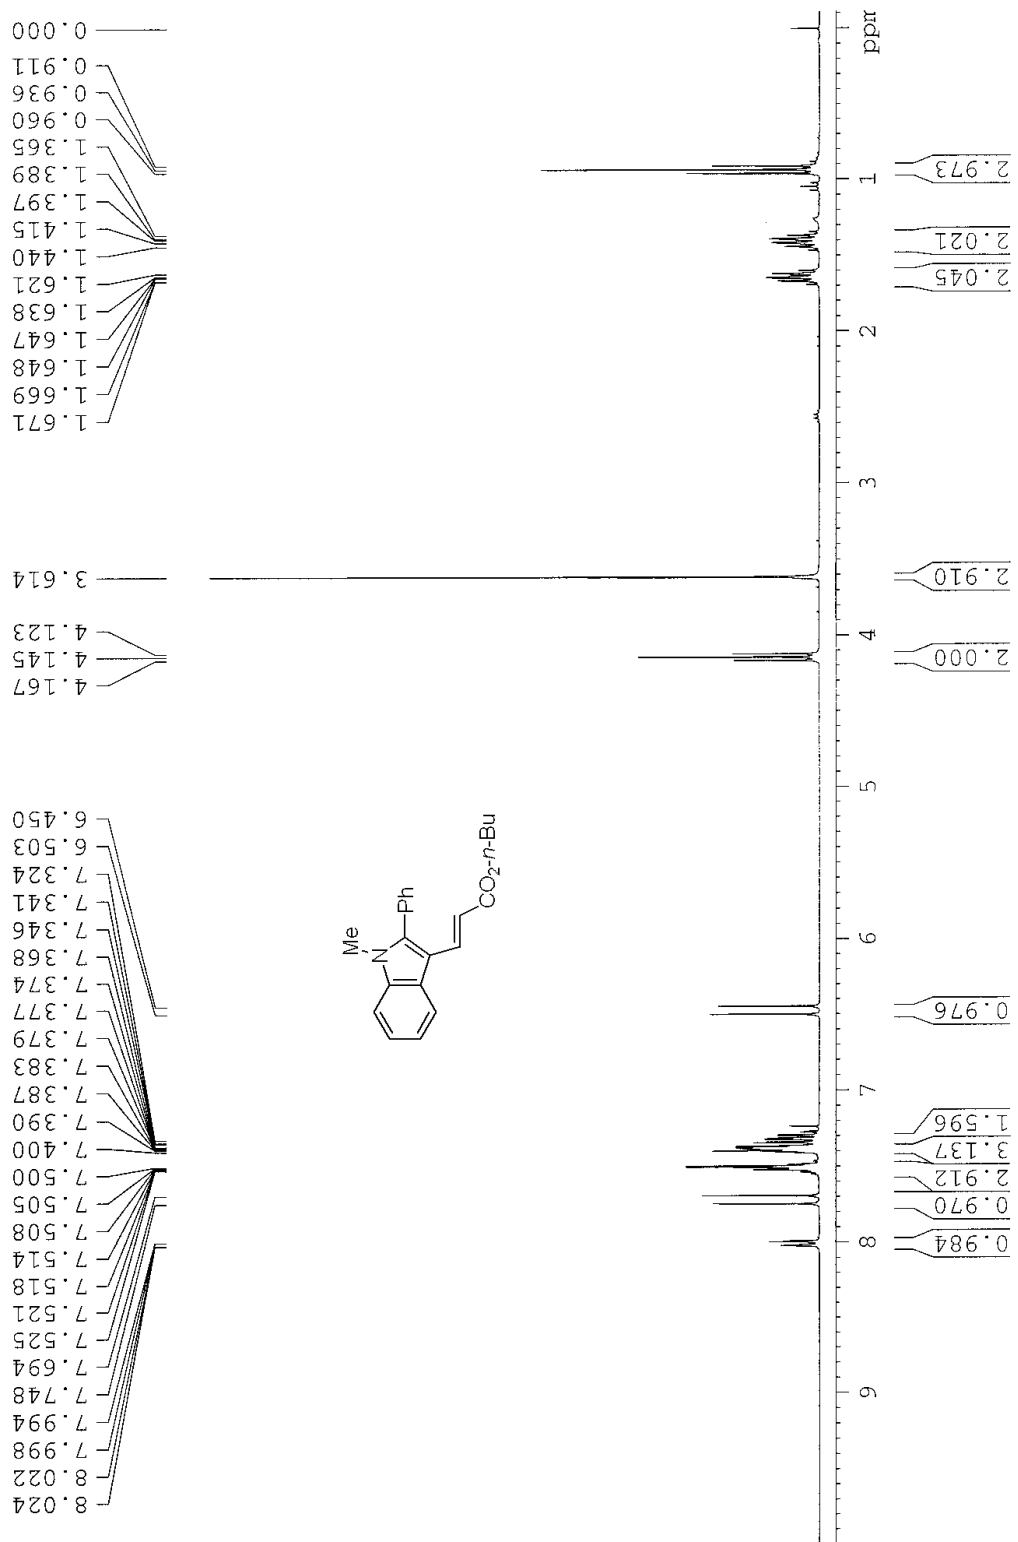

data/nmr300/dwx1621

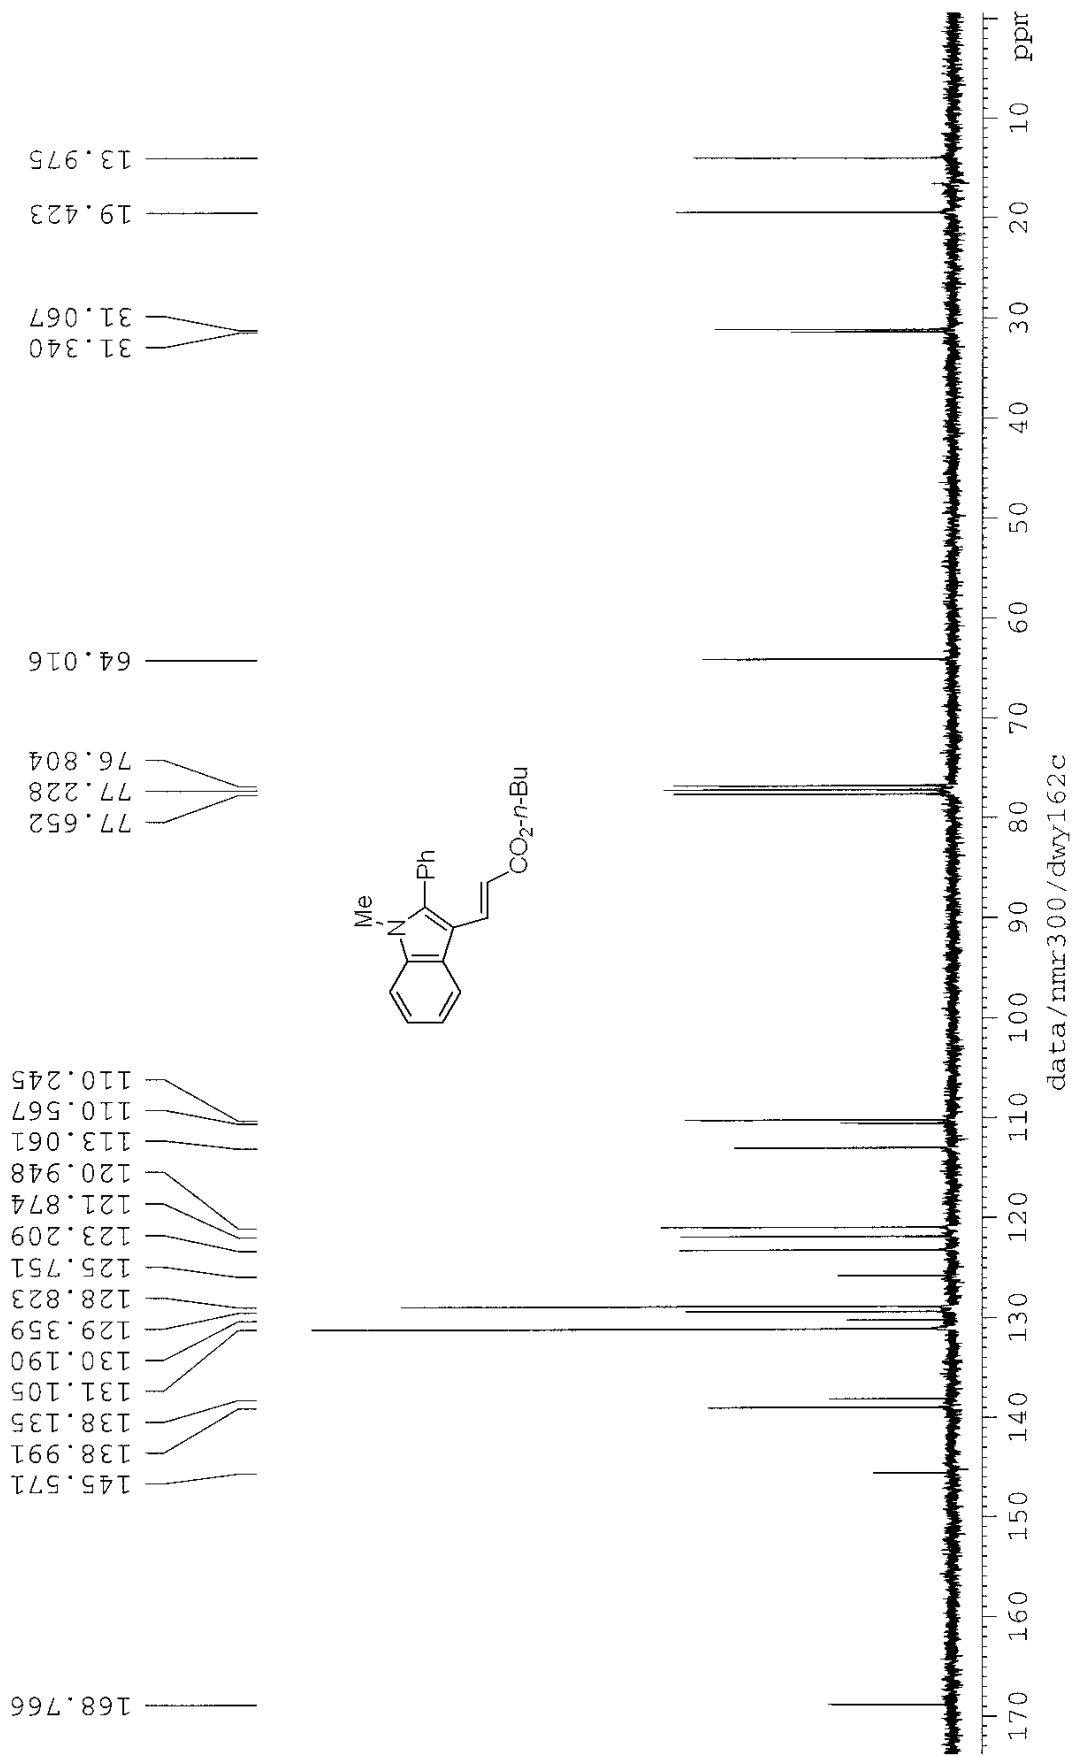

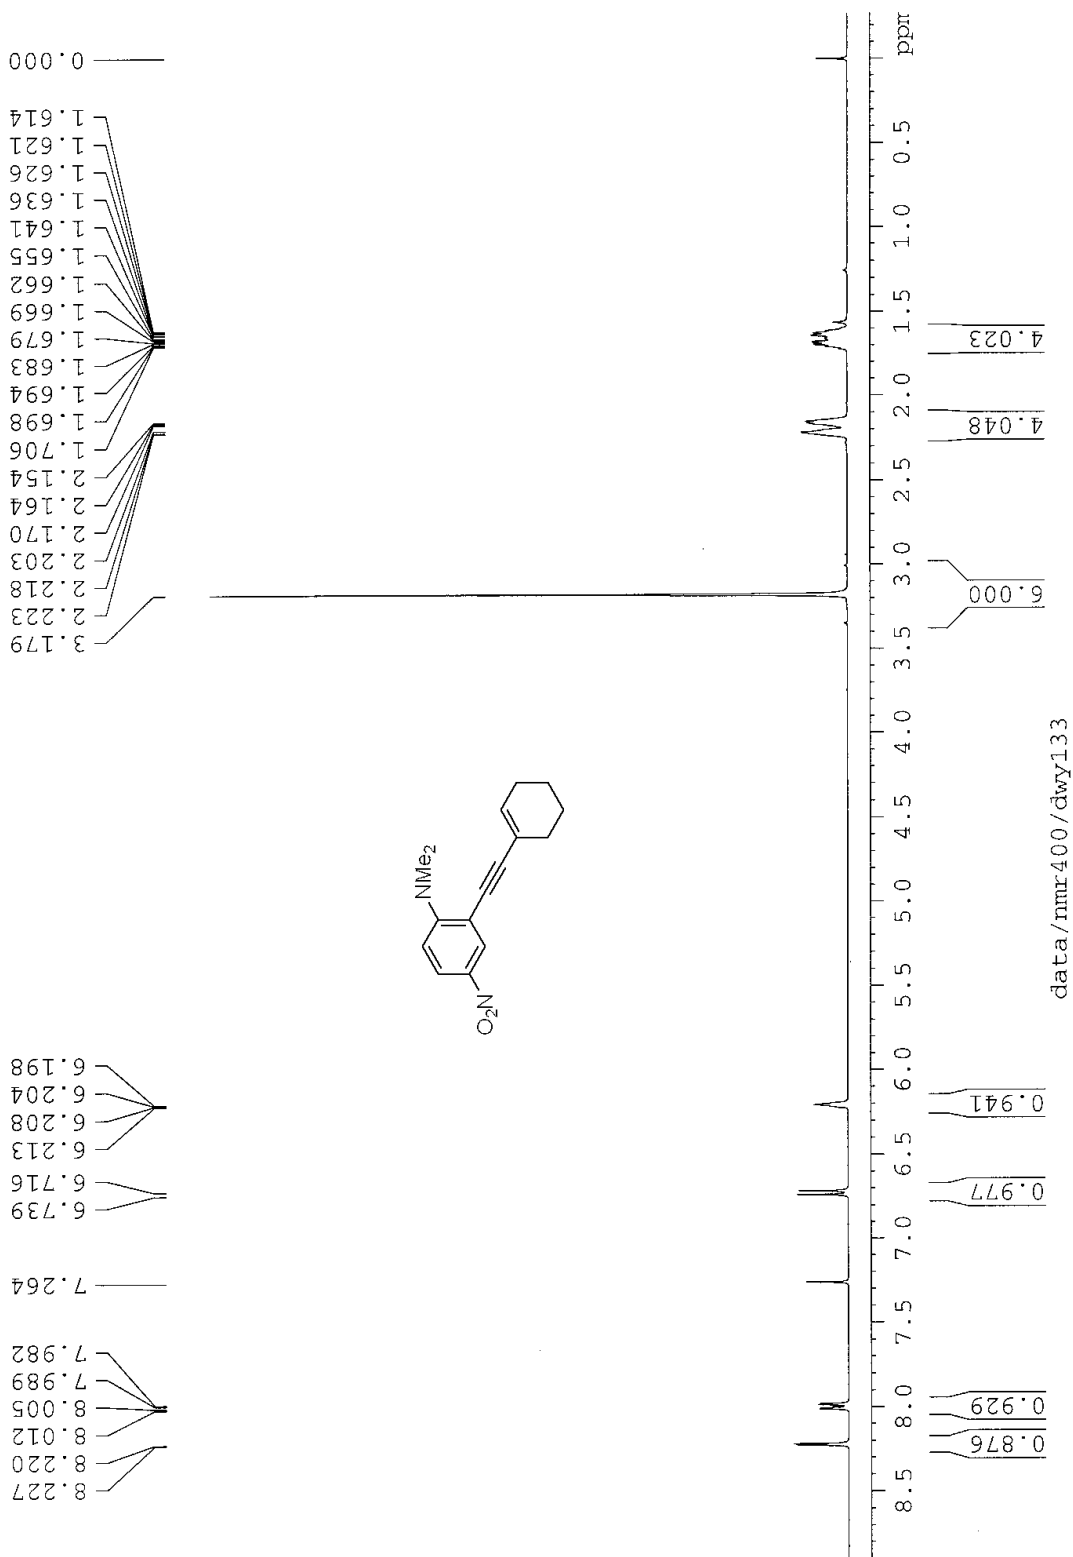



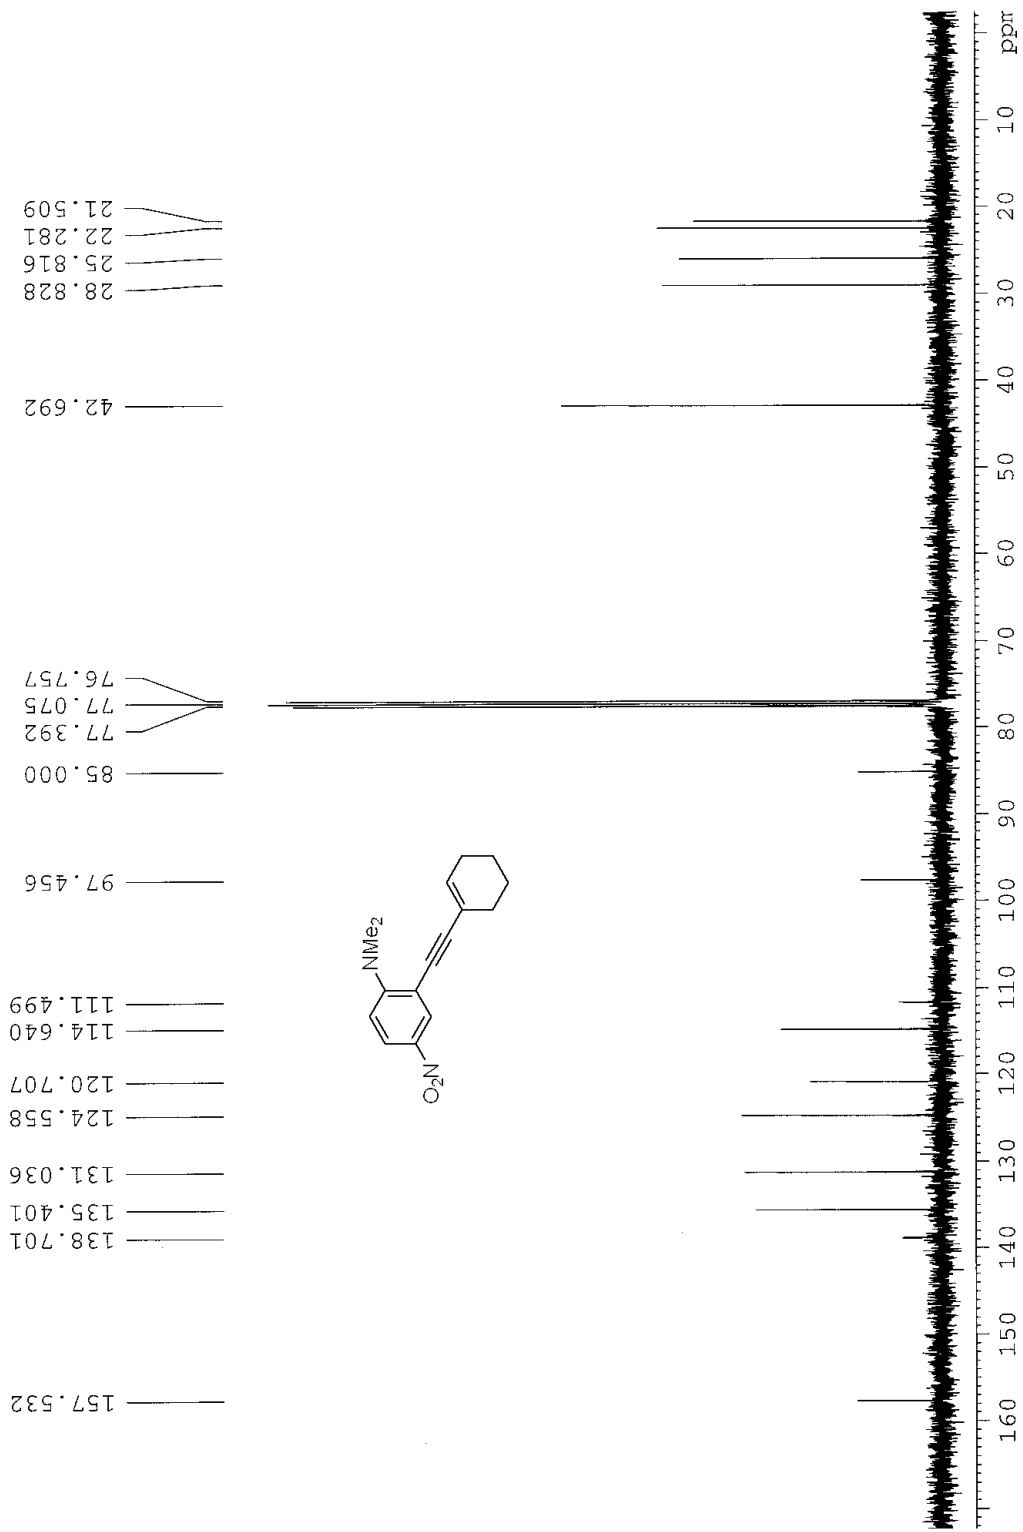

data/nmr400/dwy133c

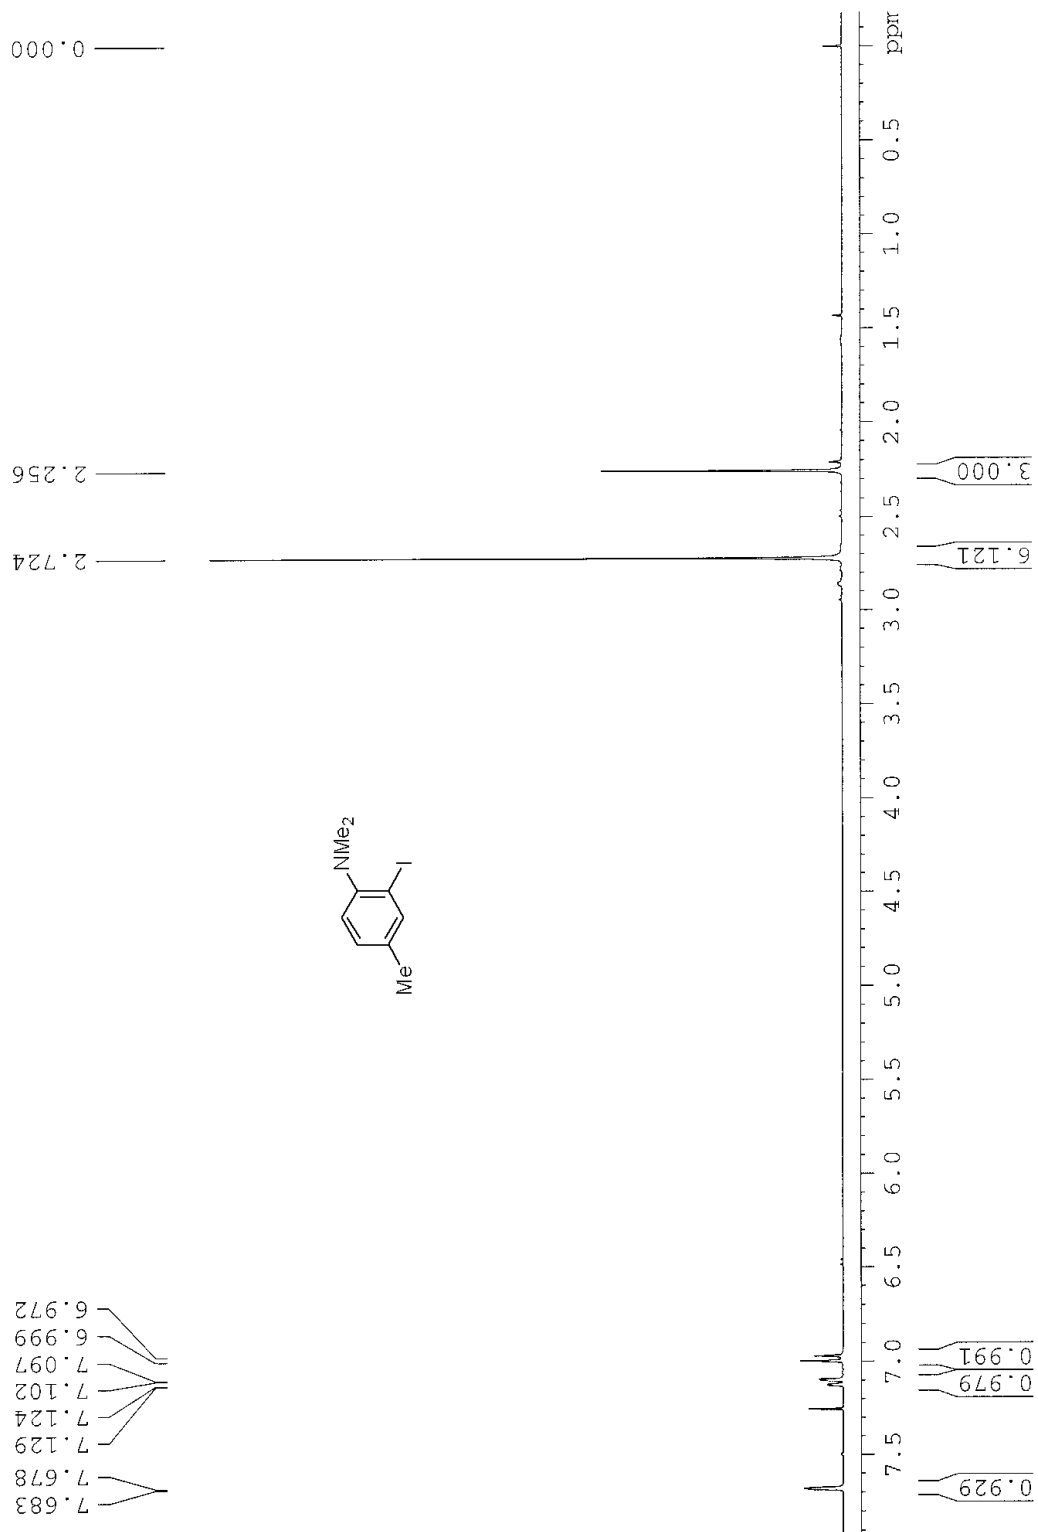

data/nmr300/dwy146

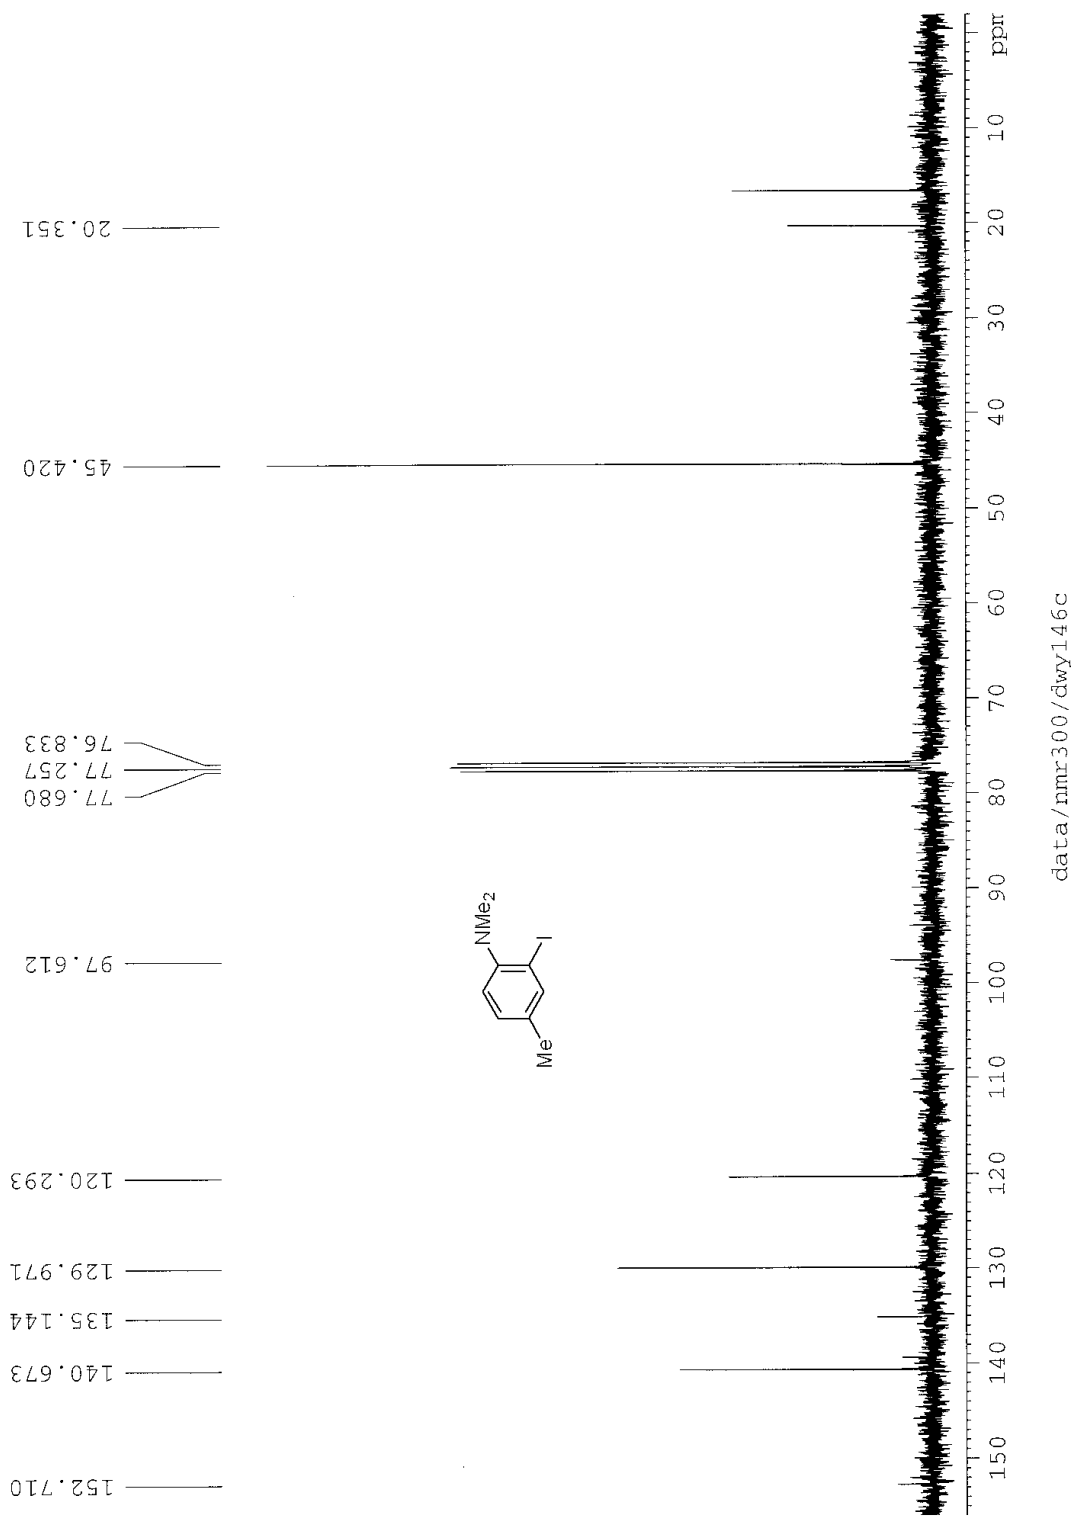

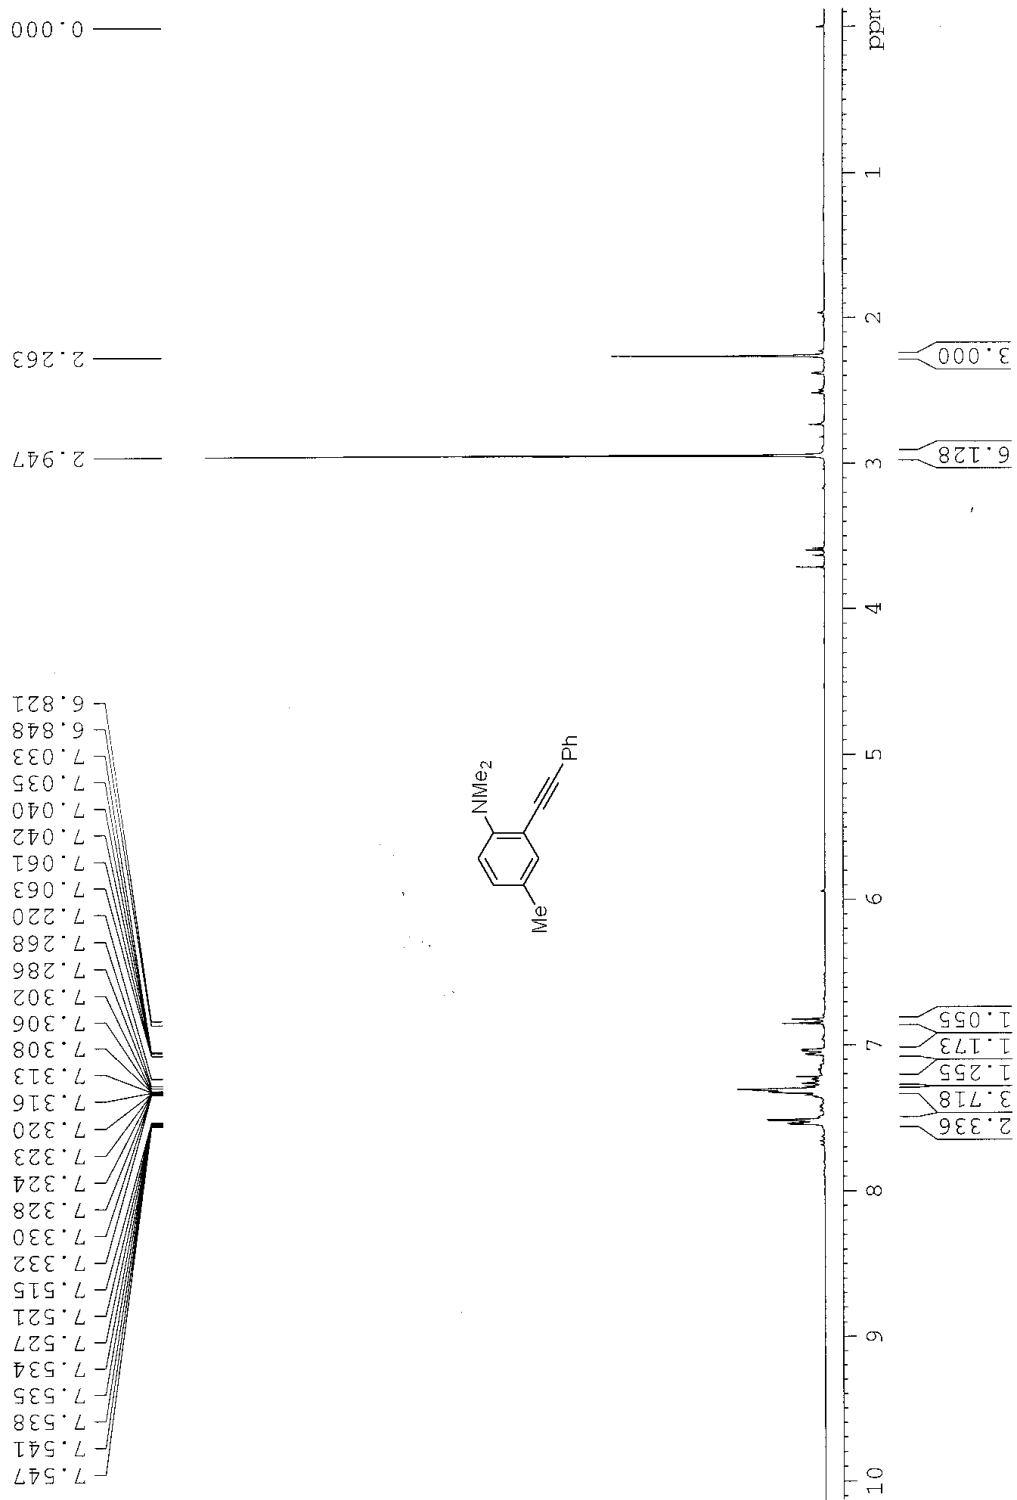

data/nmr300/dwy147

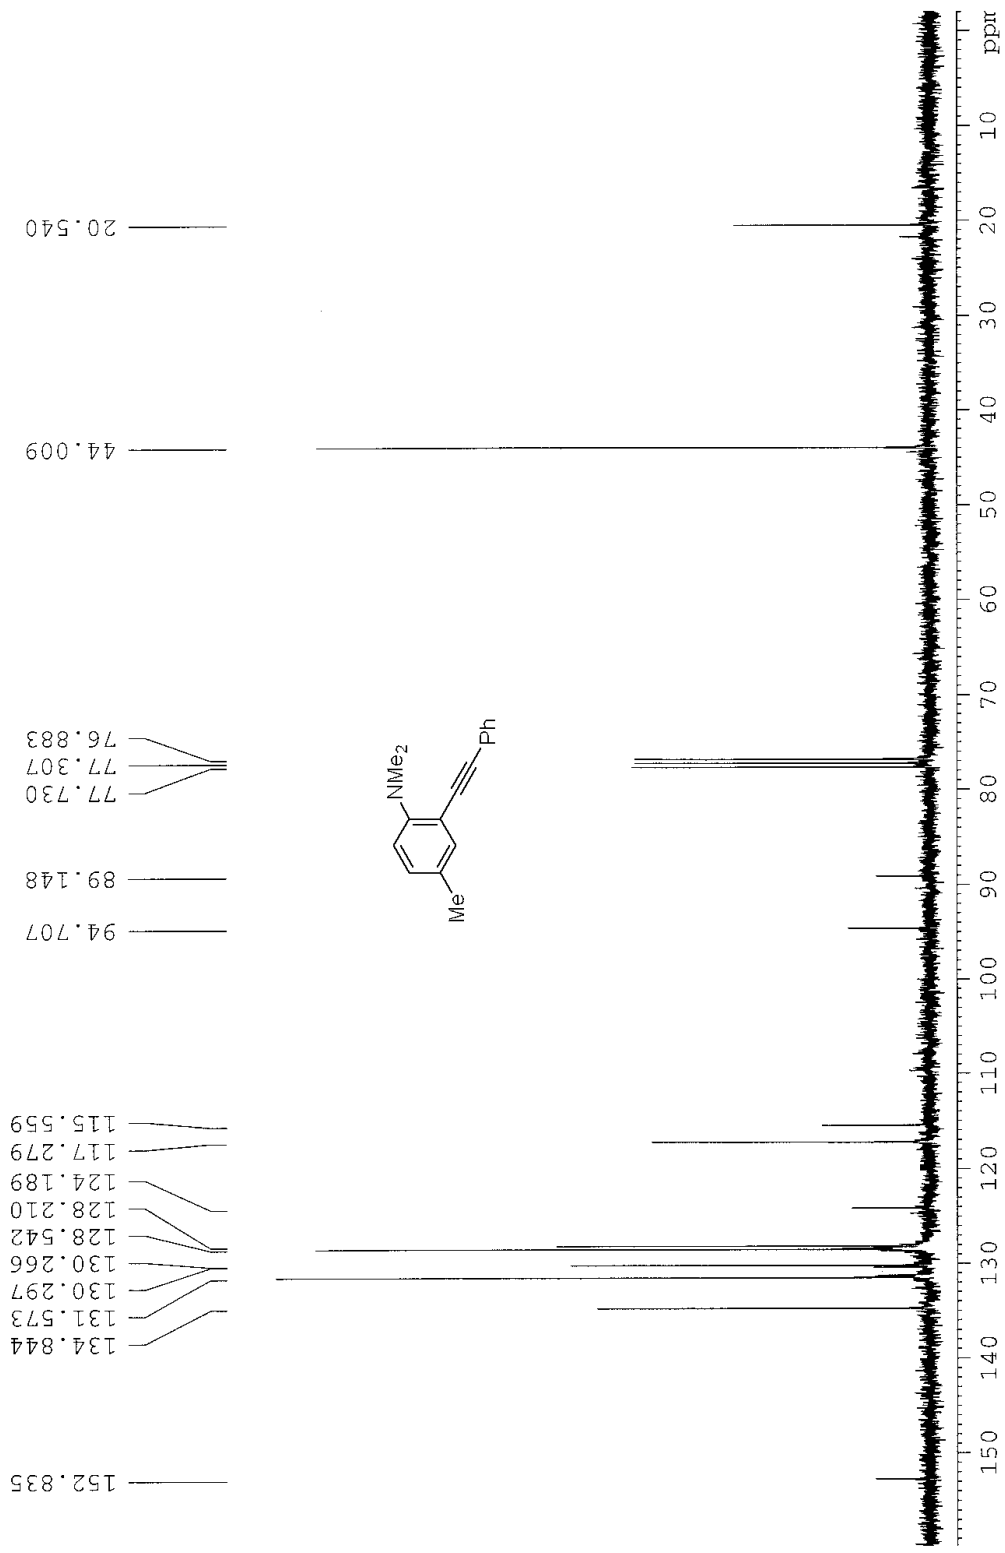

data/nmr300/dwy147c

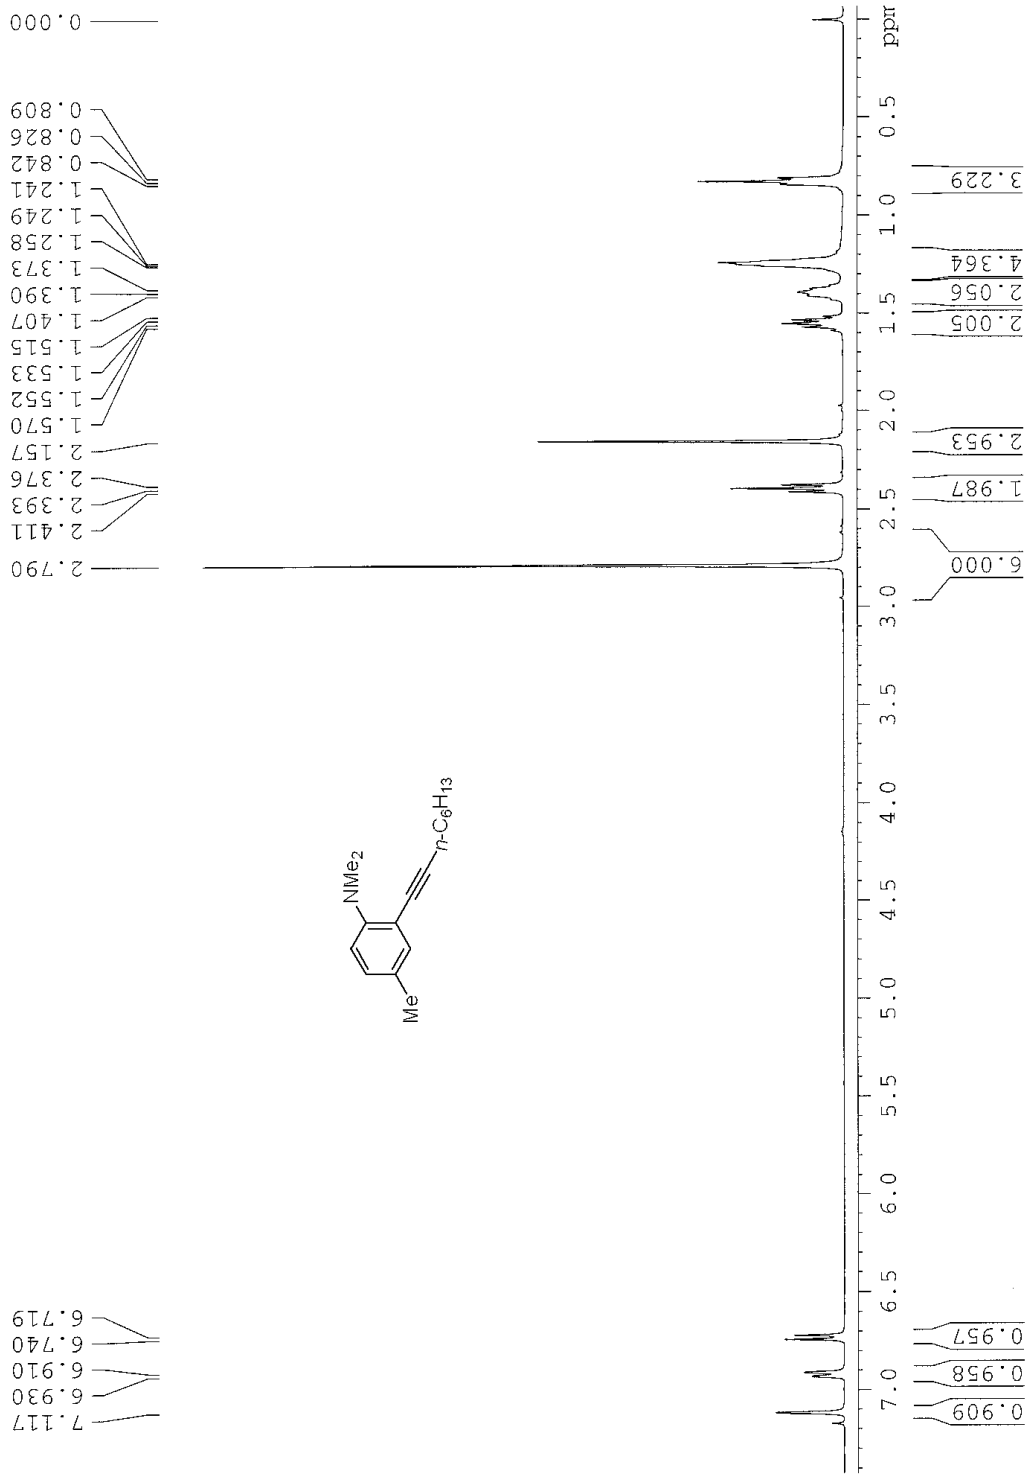

data/nmr400/dwy149

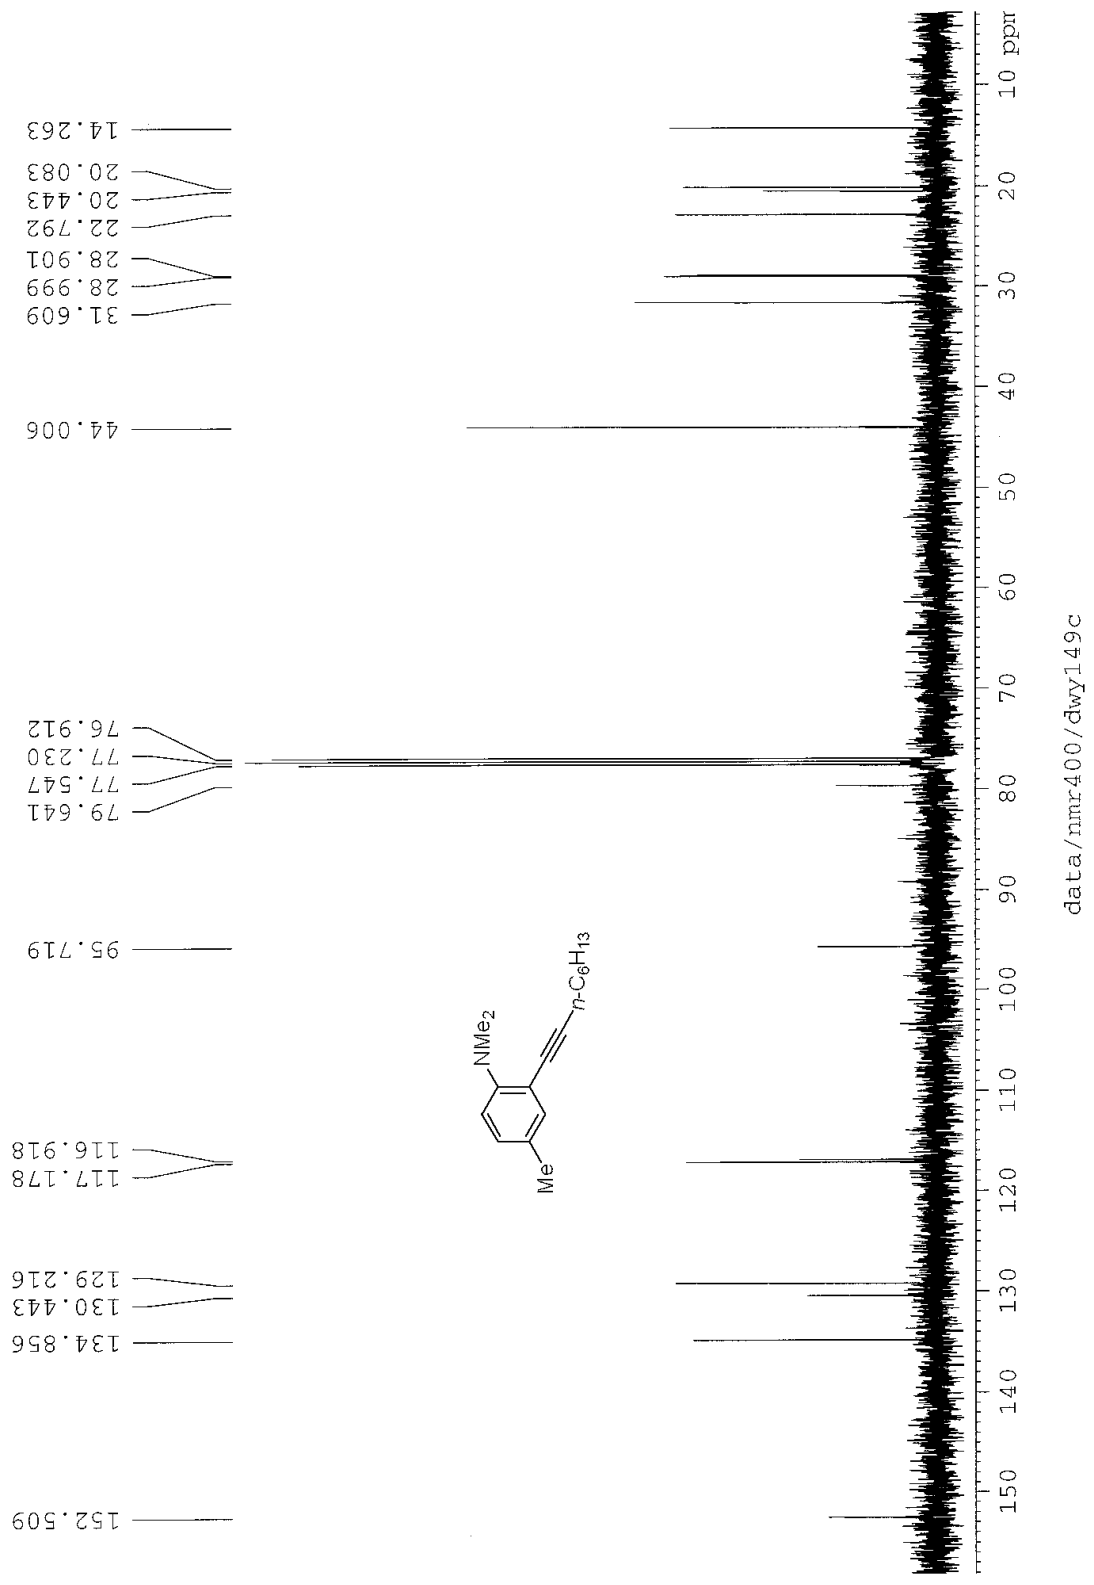

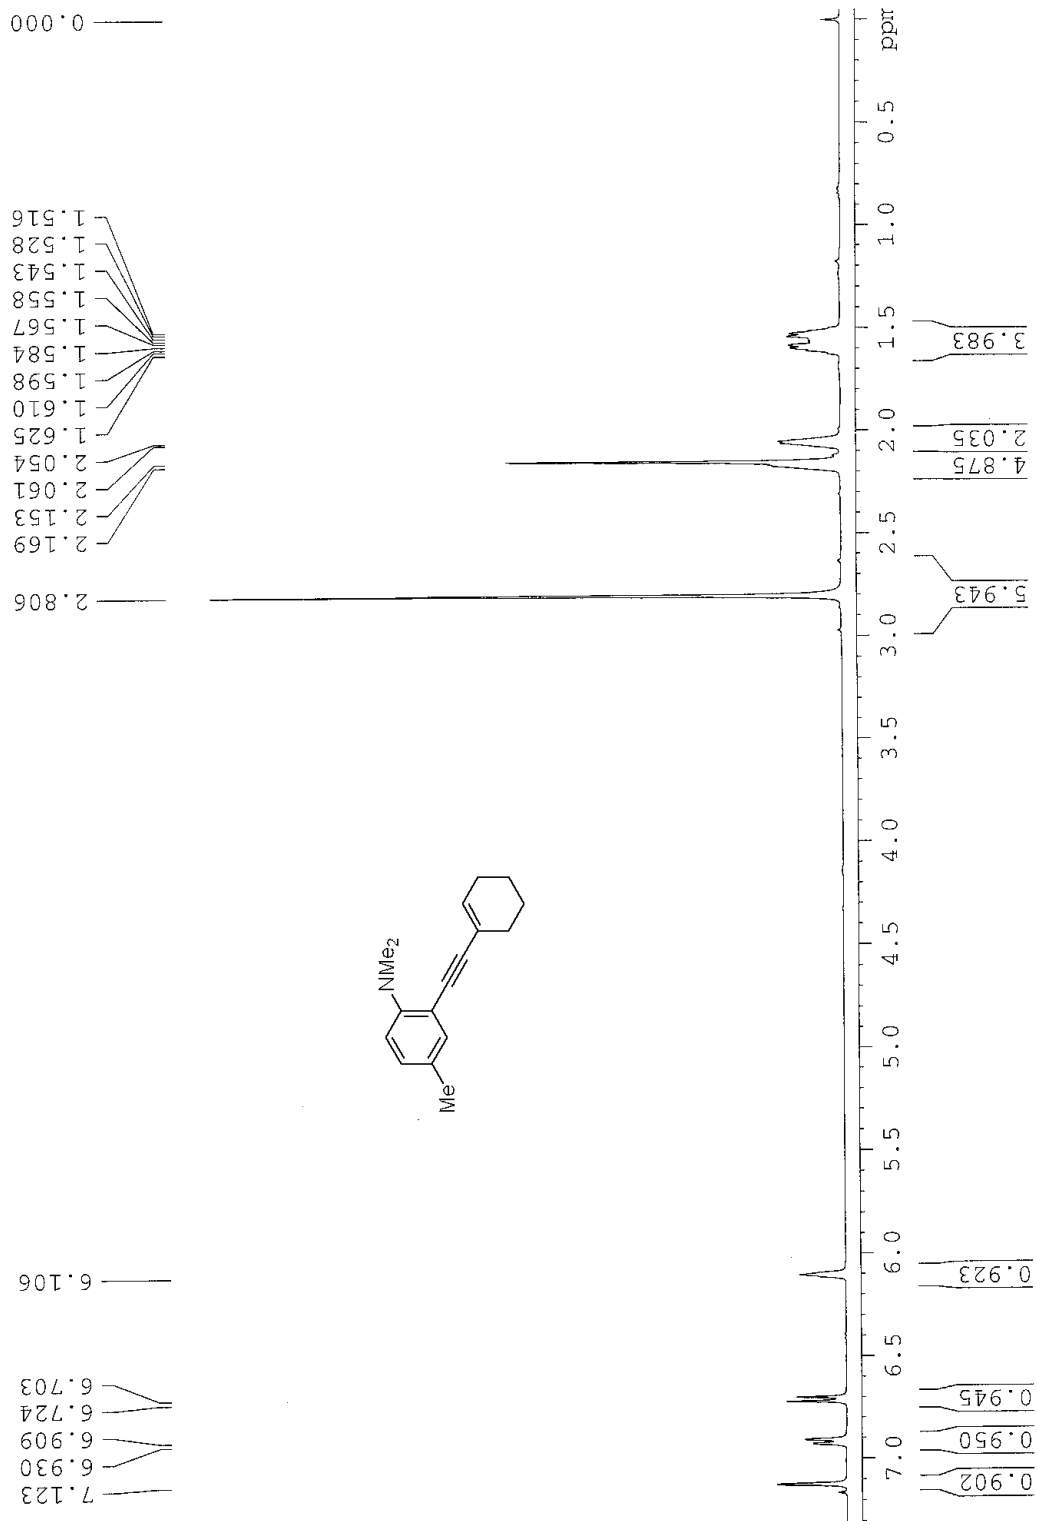

data/rnr400/dwy144



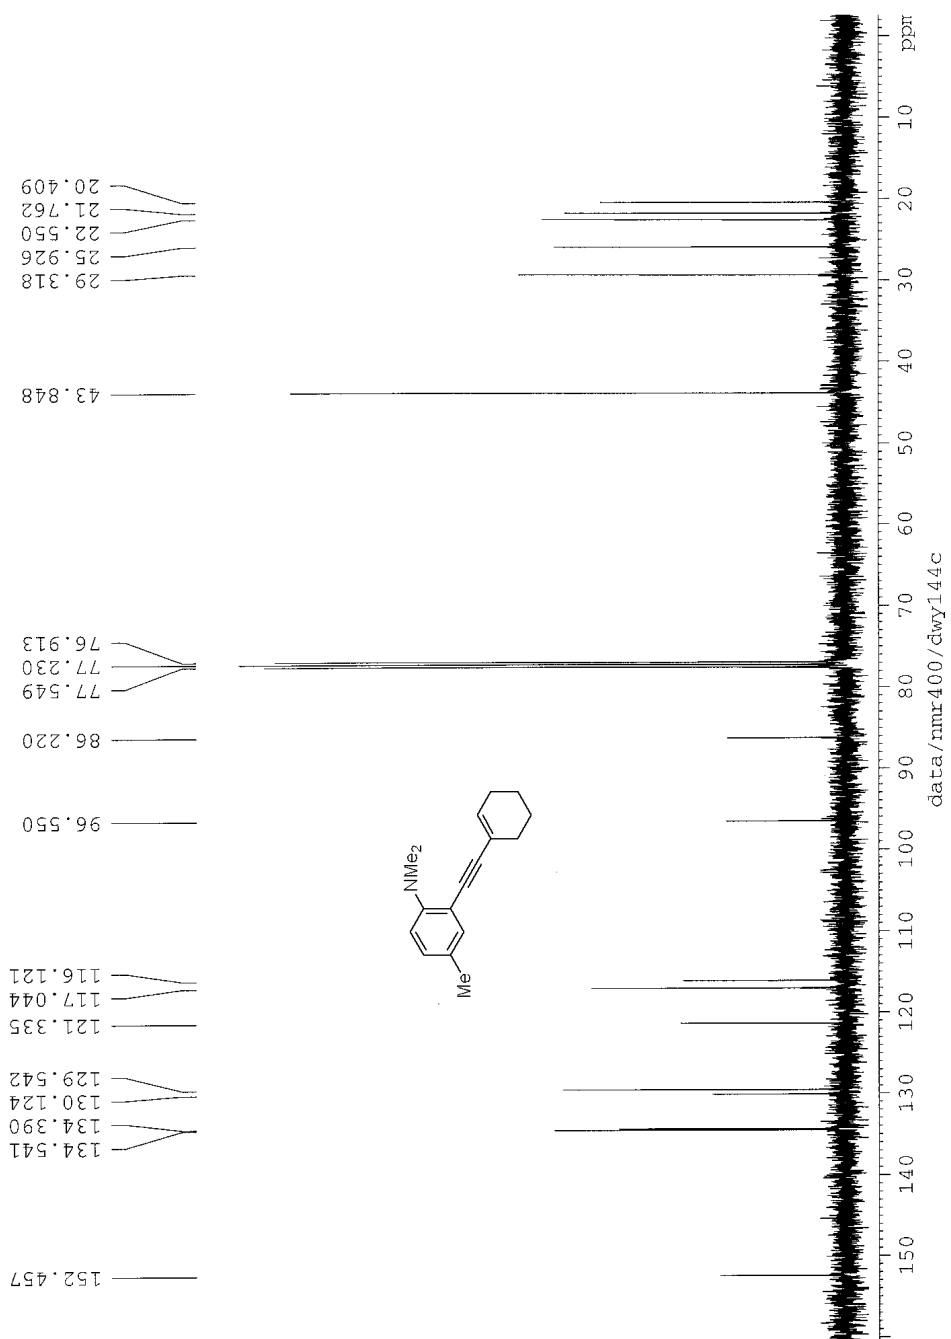

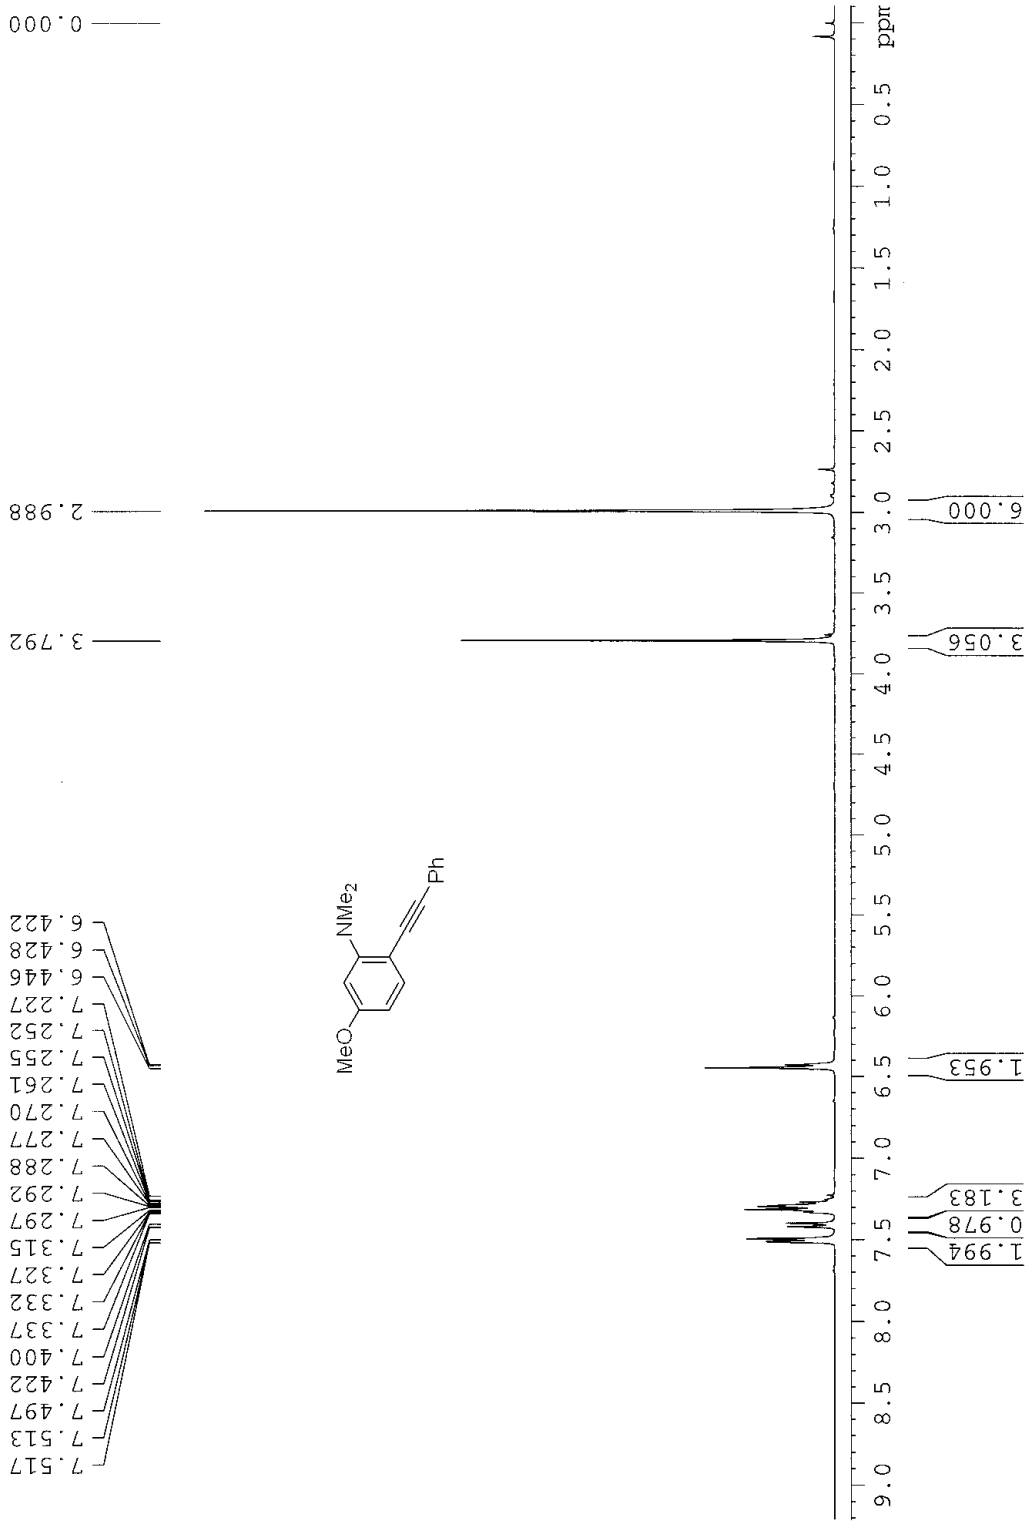

data/nmr400/dwy162

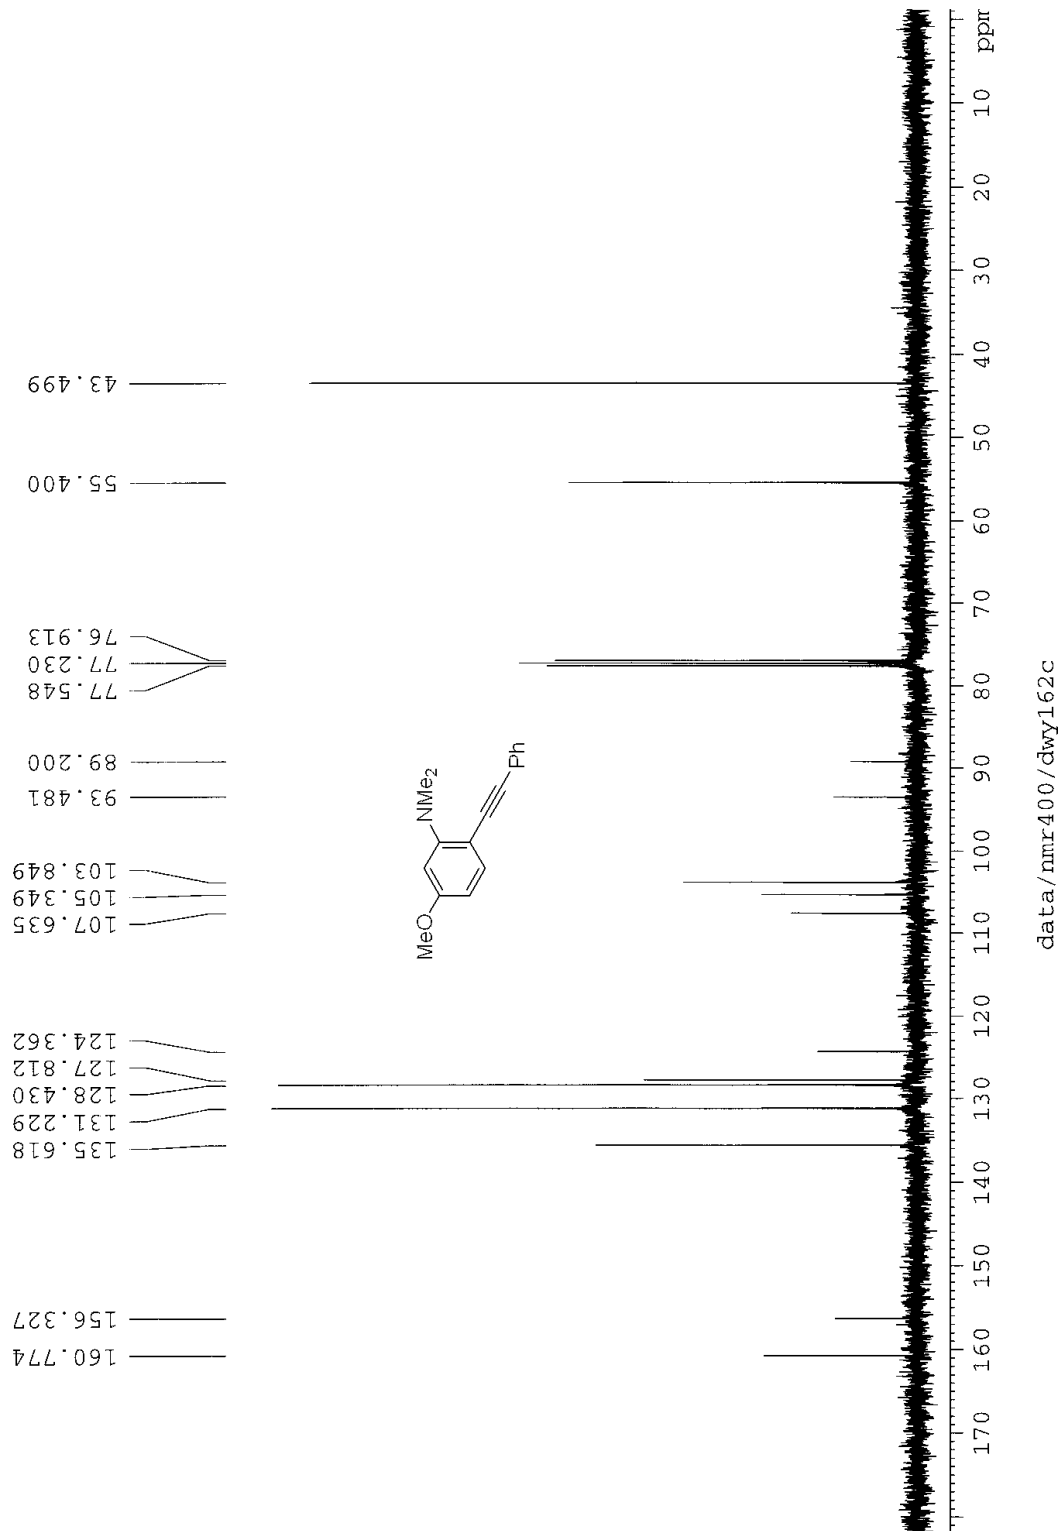

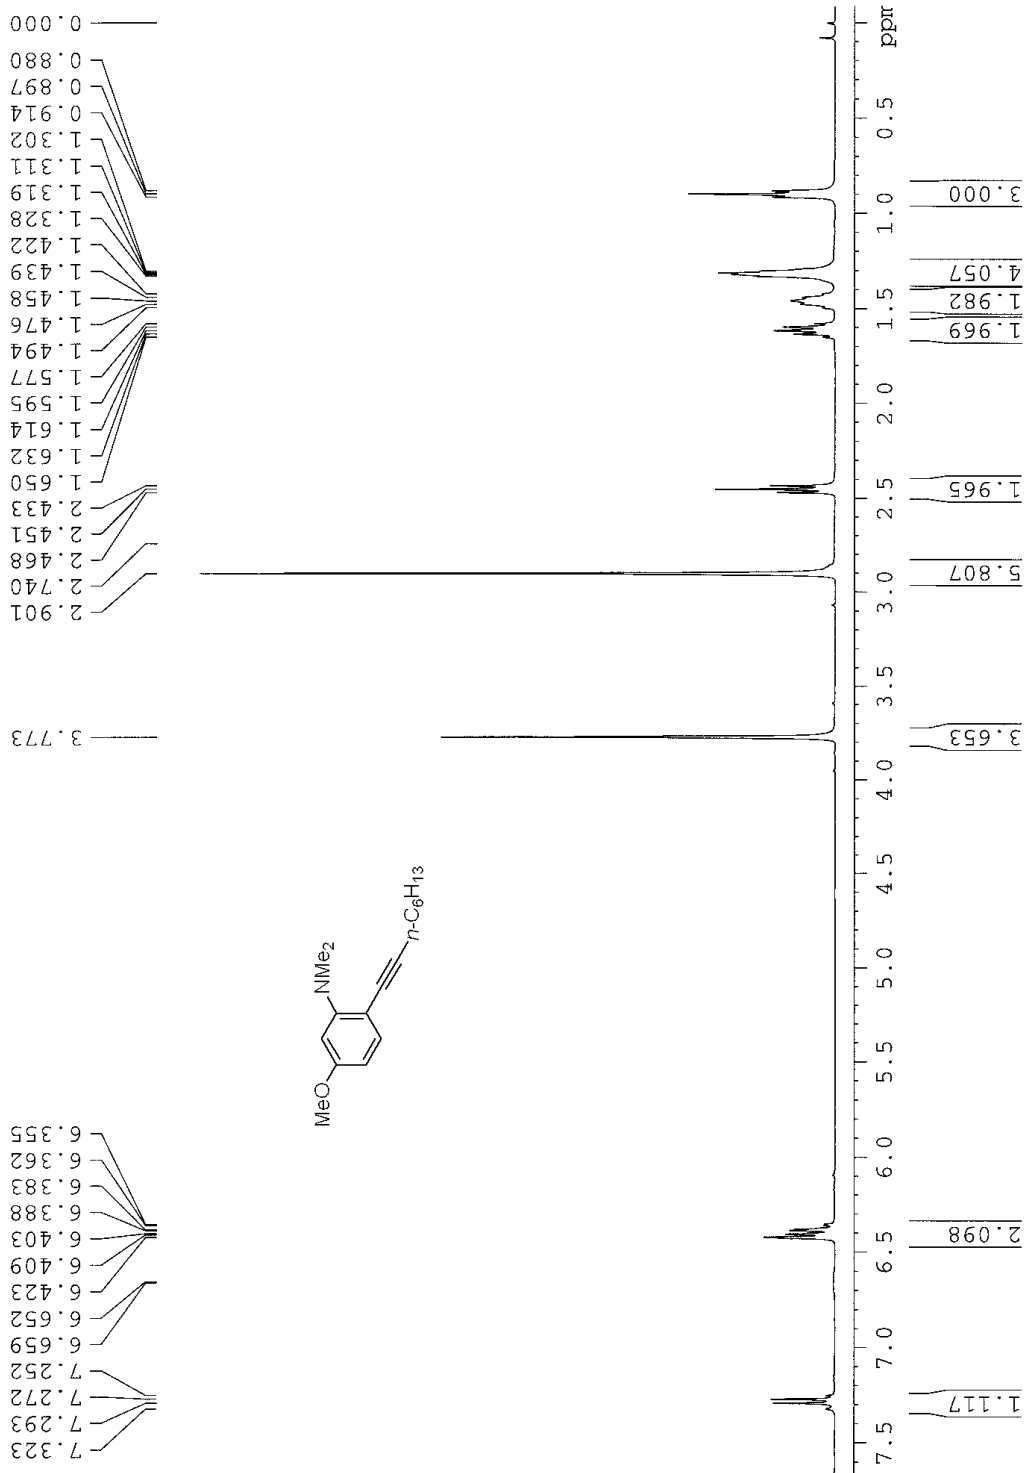

data/nmr400/dwy163

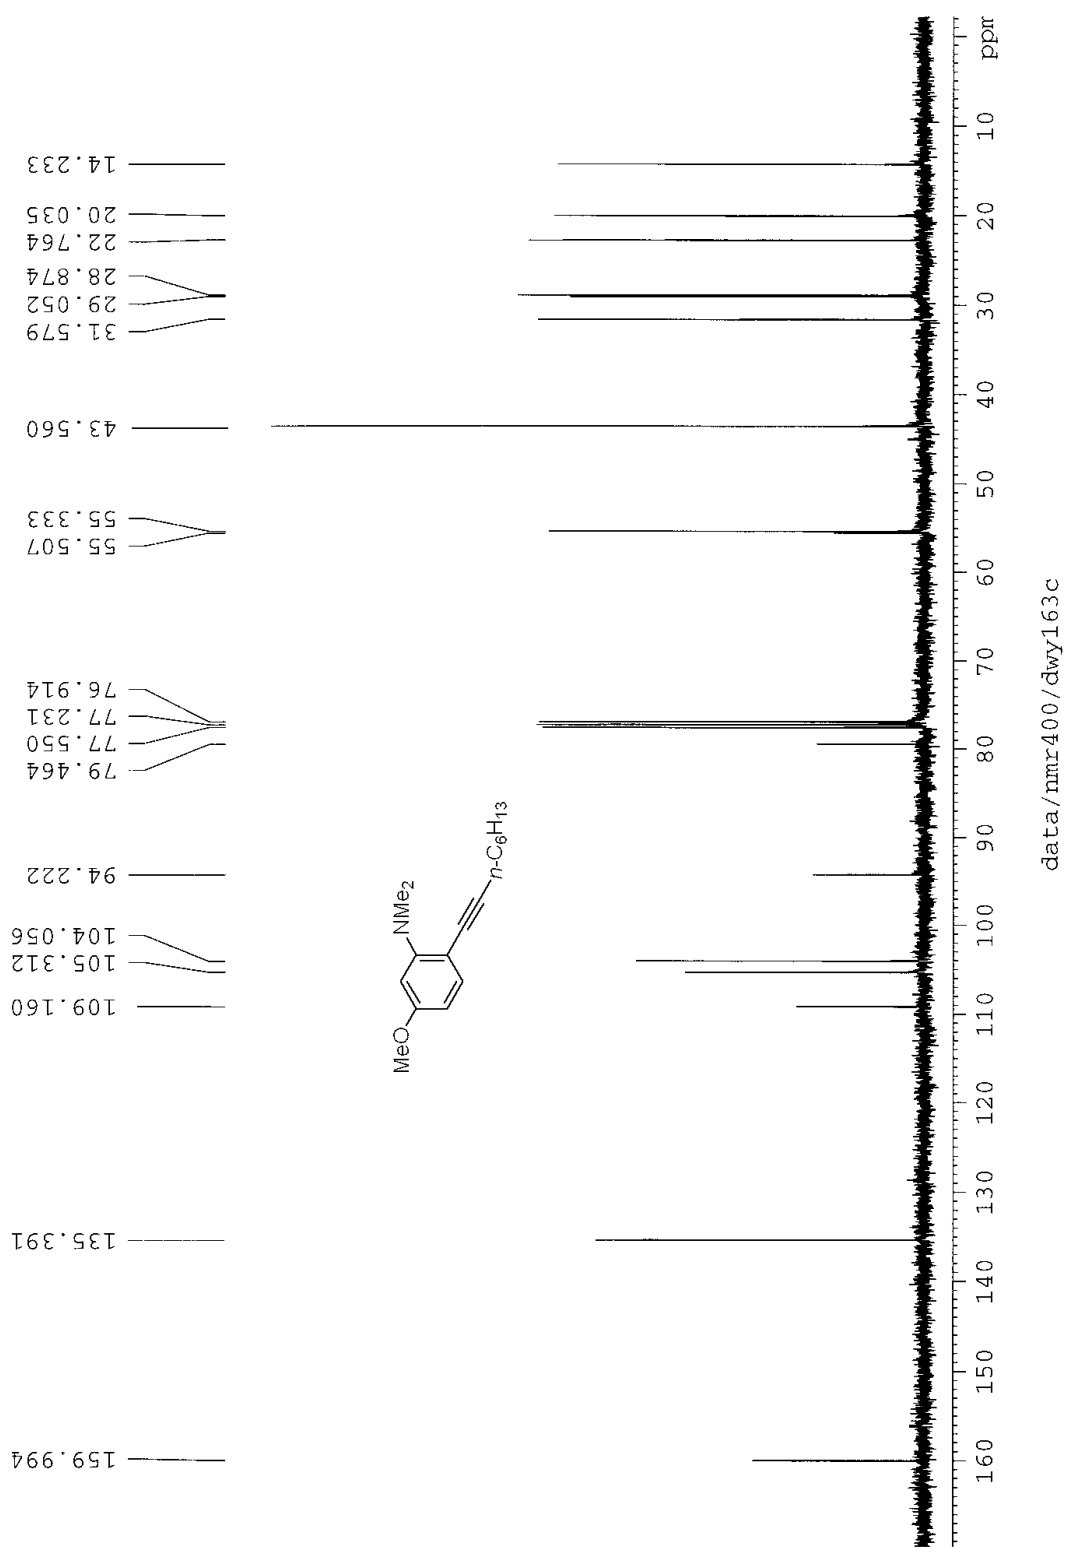

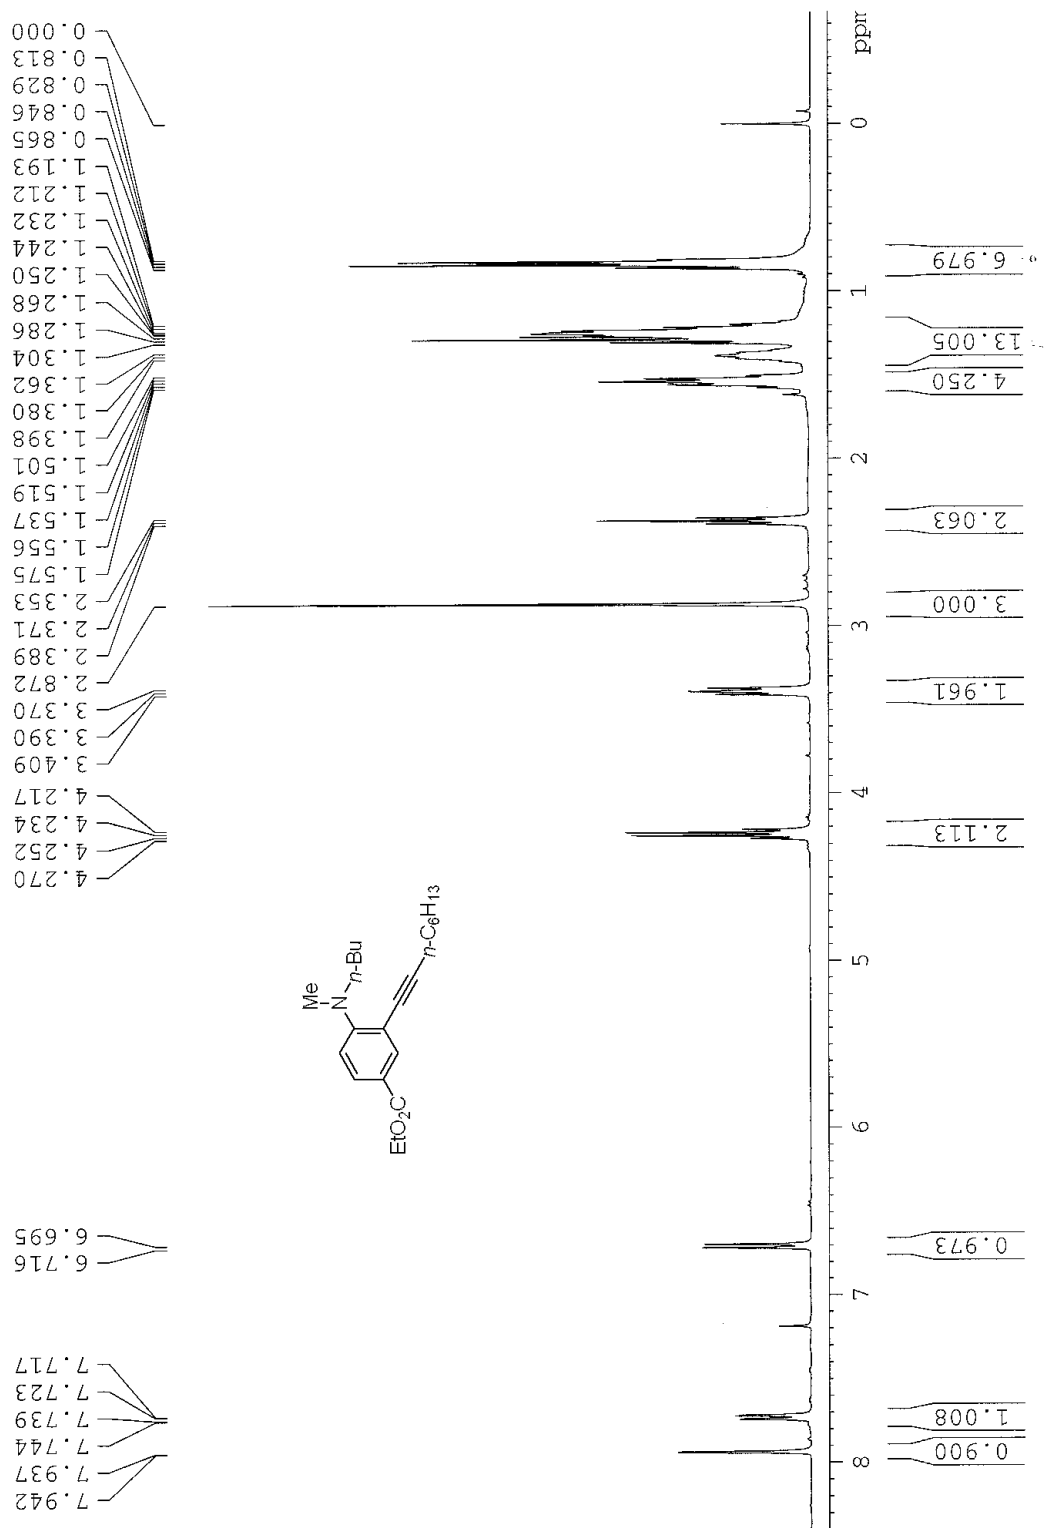

data/nmr400/dwv148

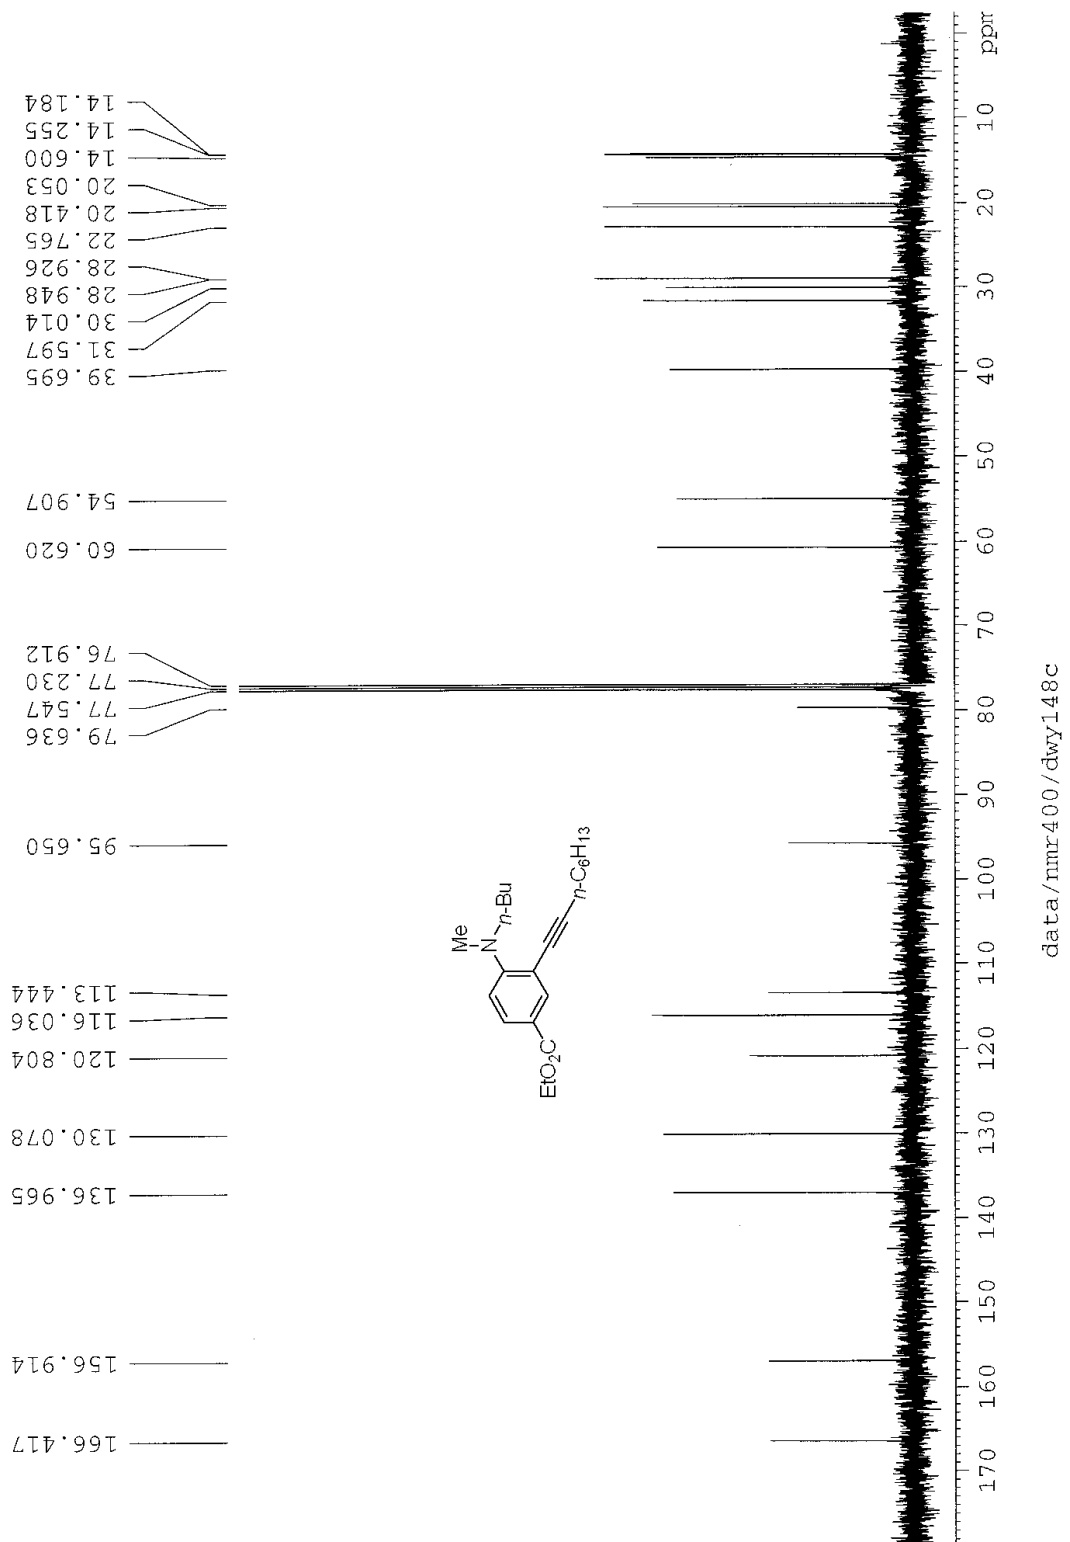

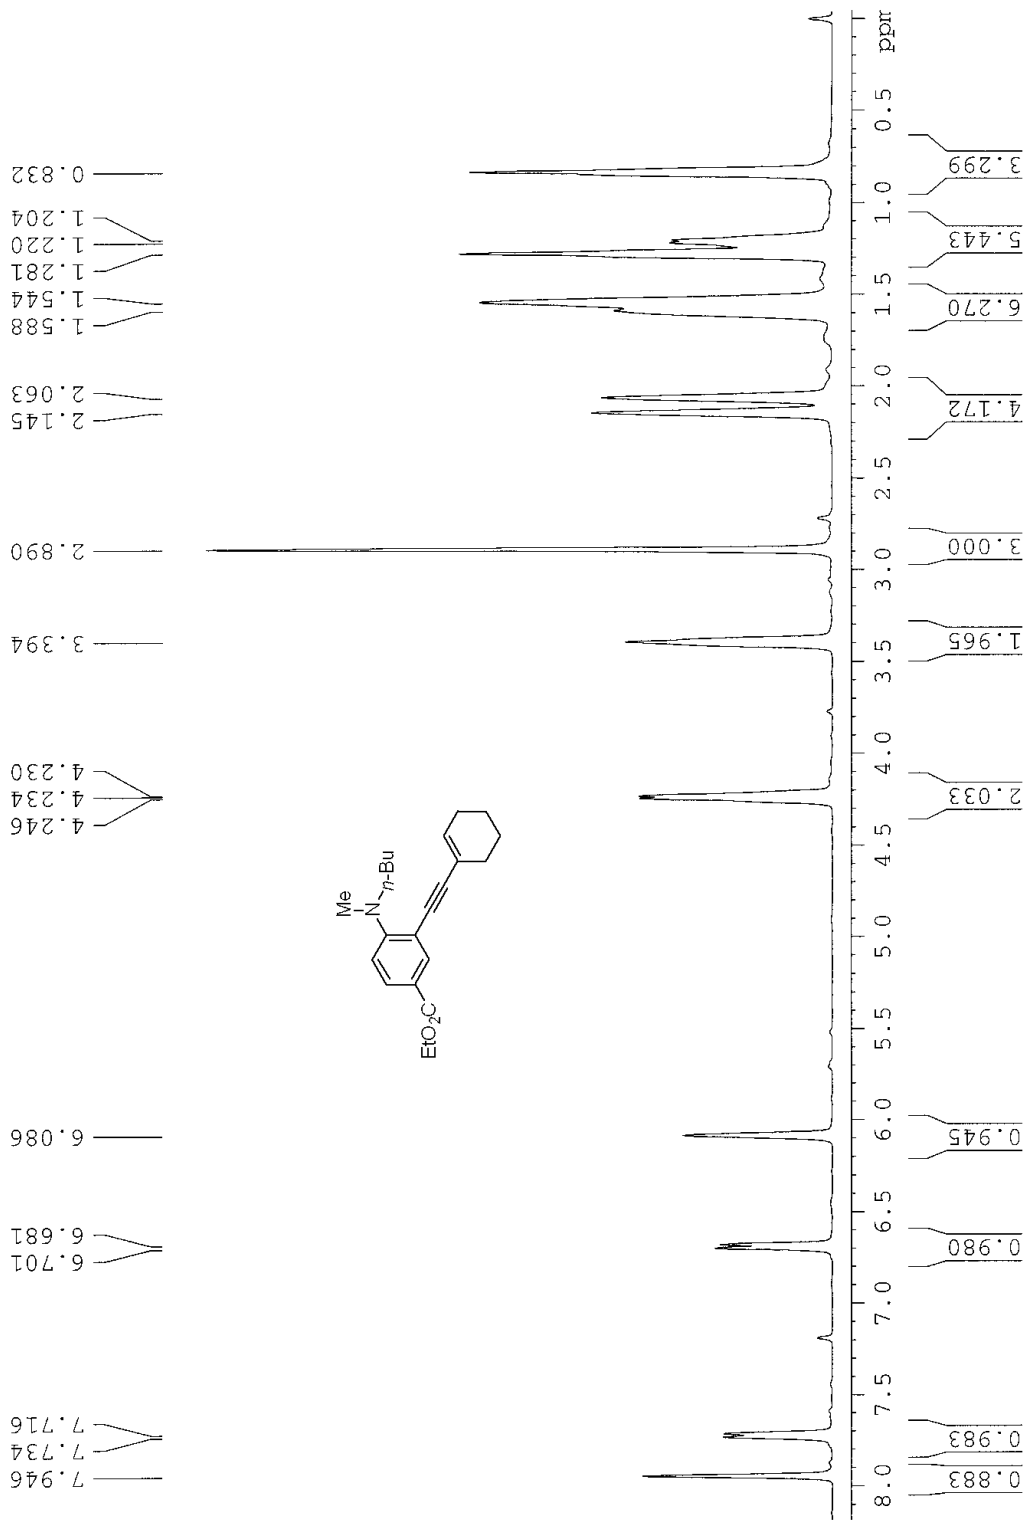

data/nmr400/dwy140



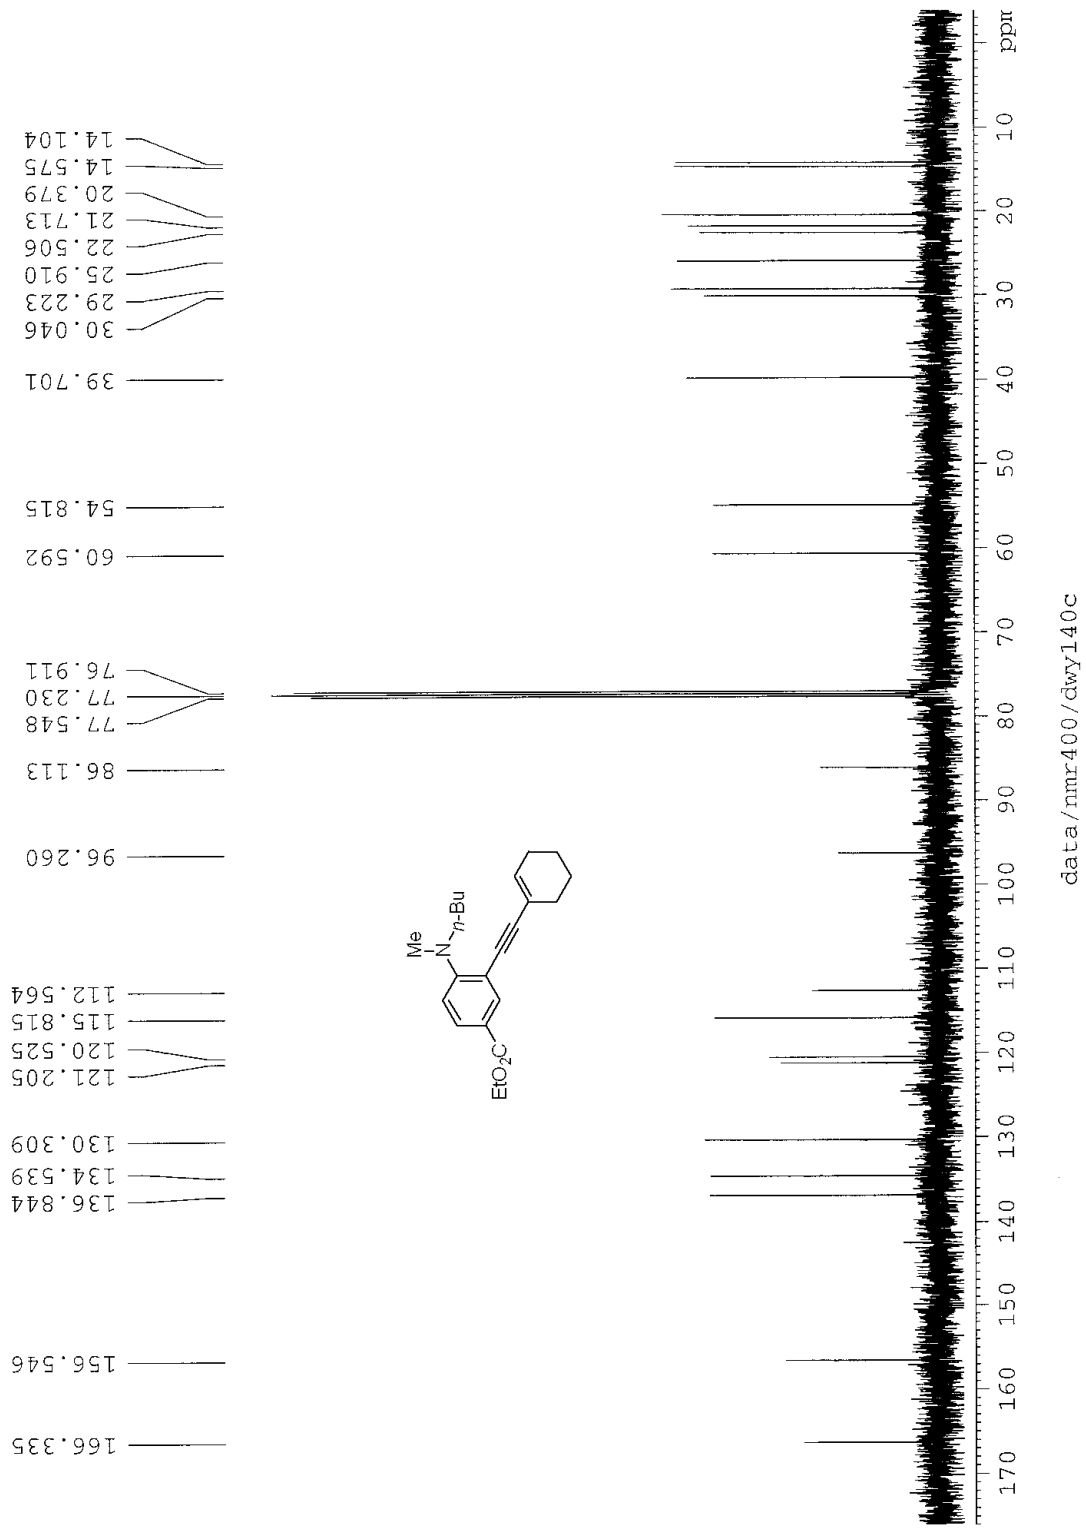

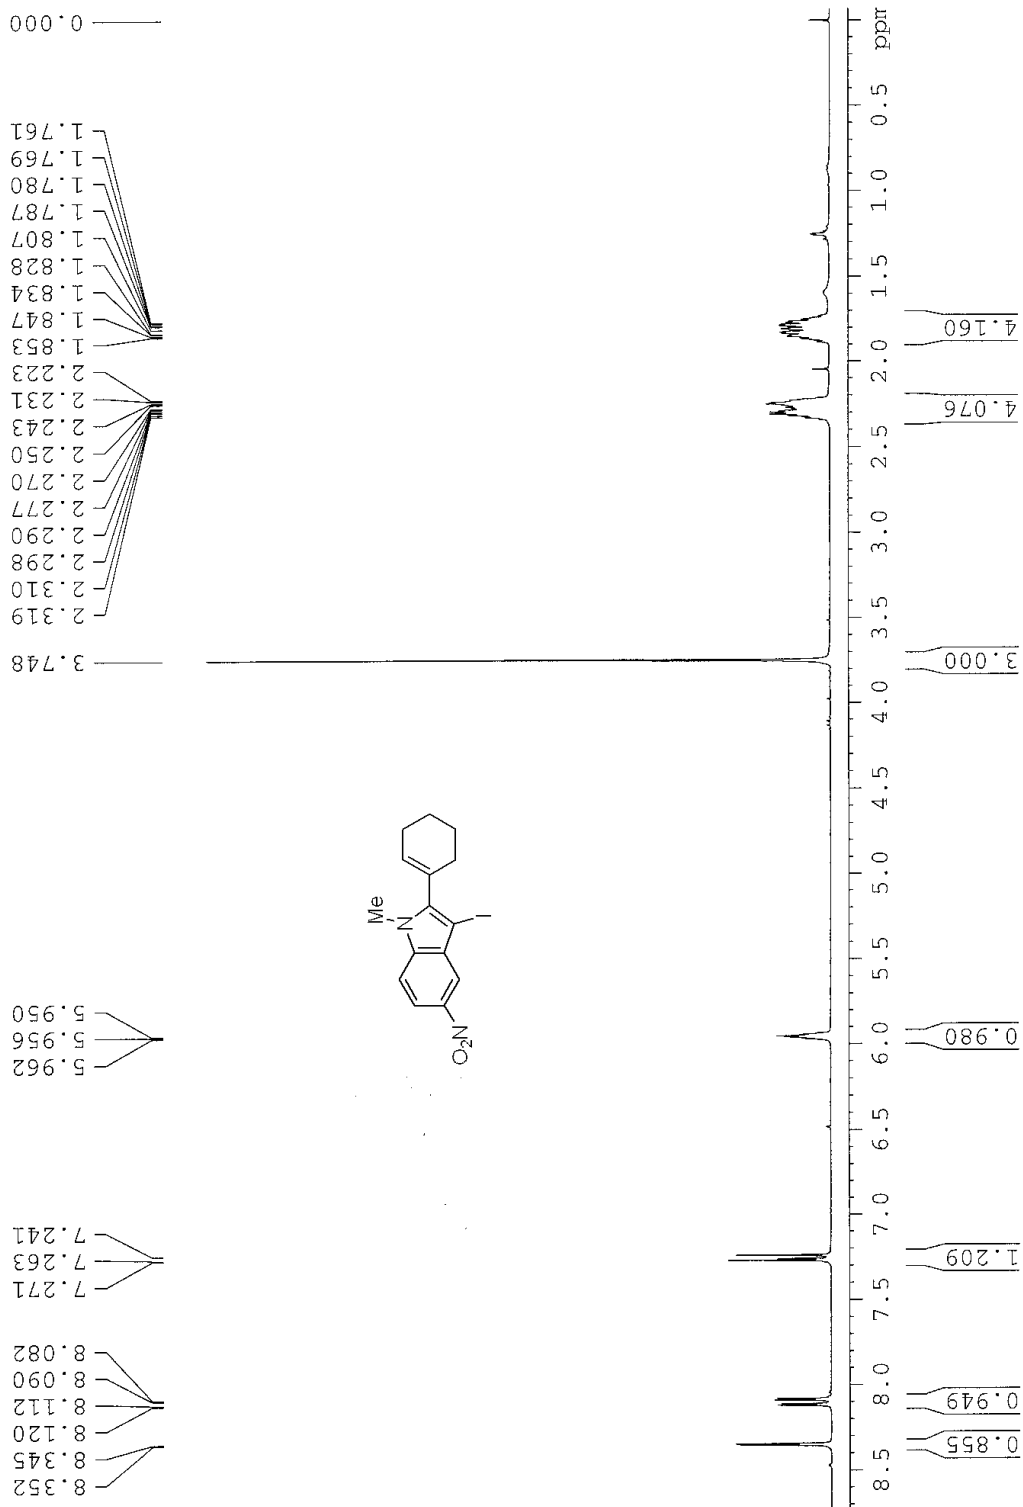

data/nmr300/dwy137

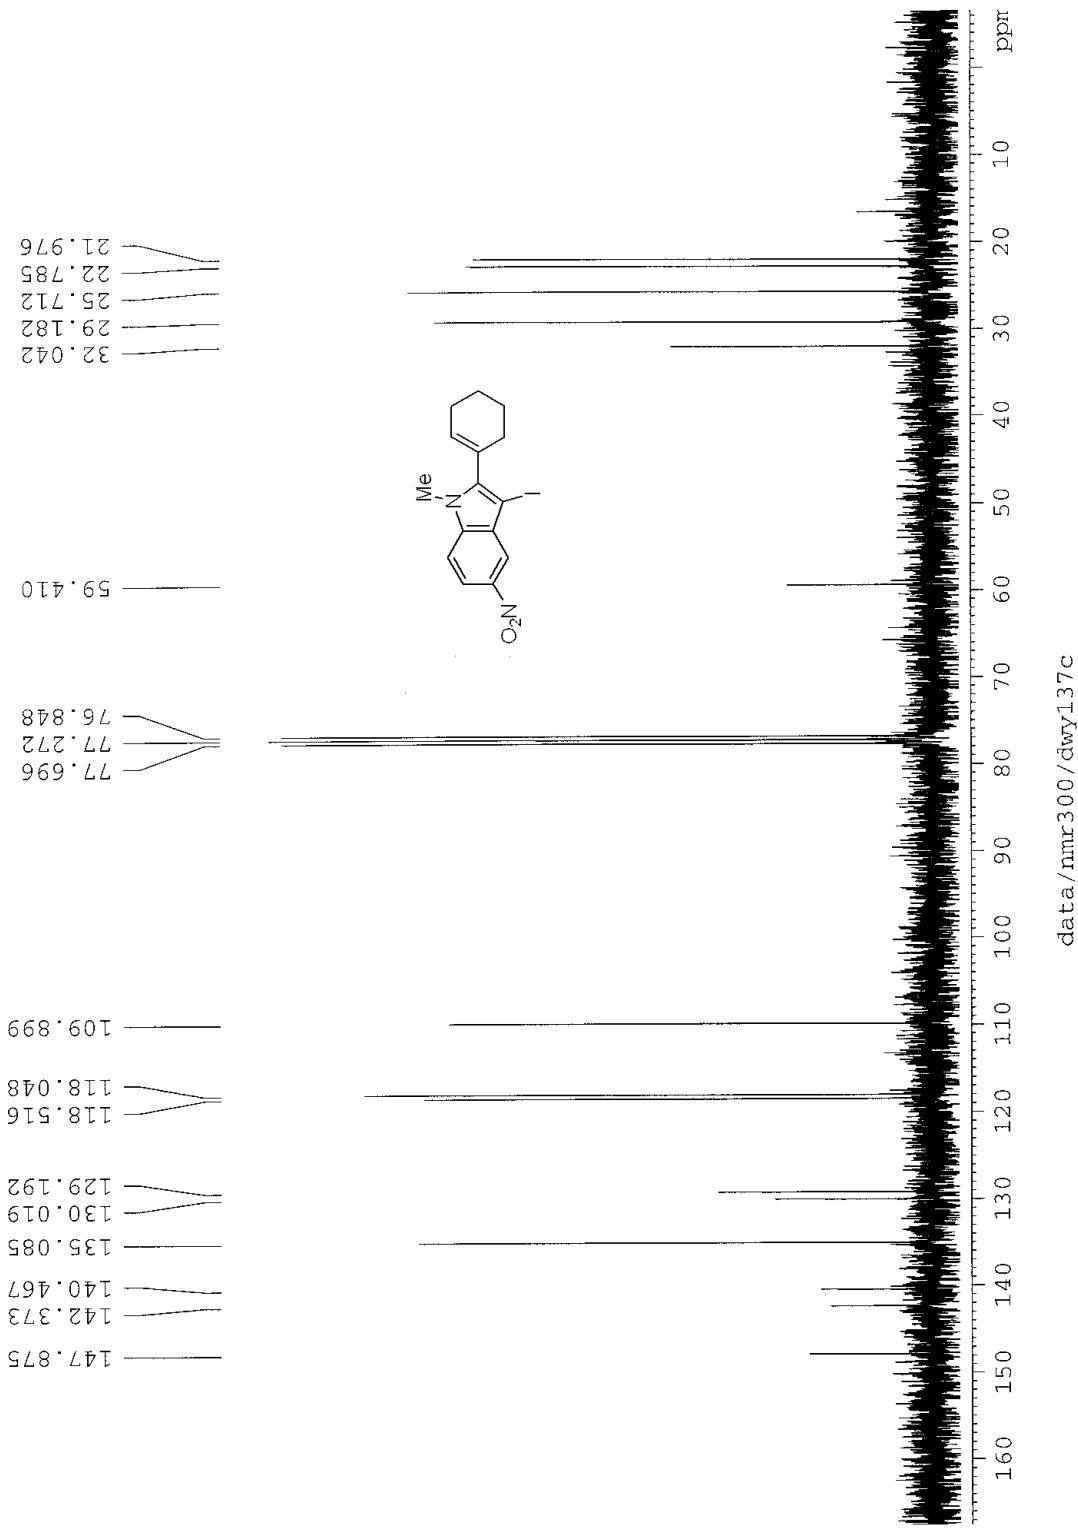

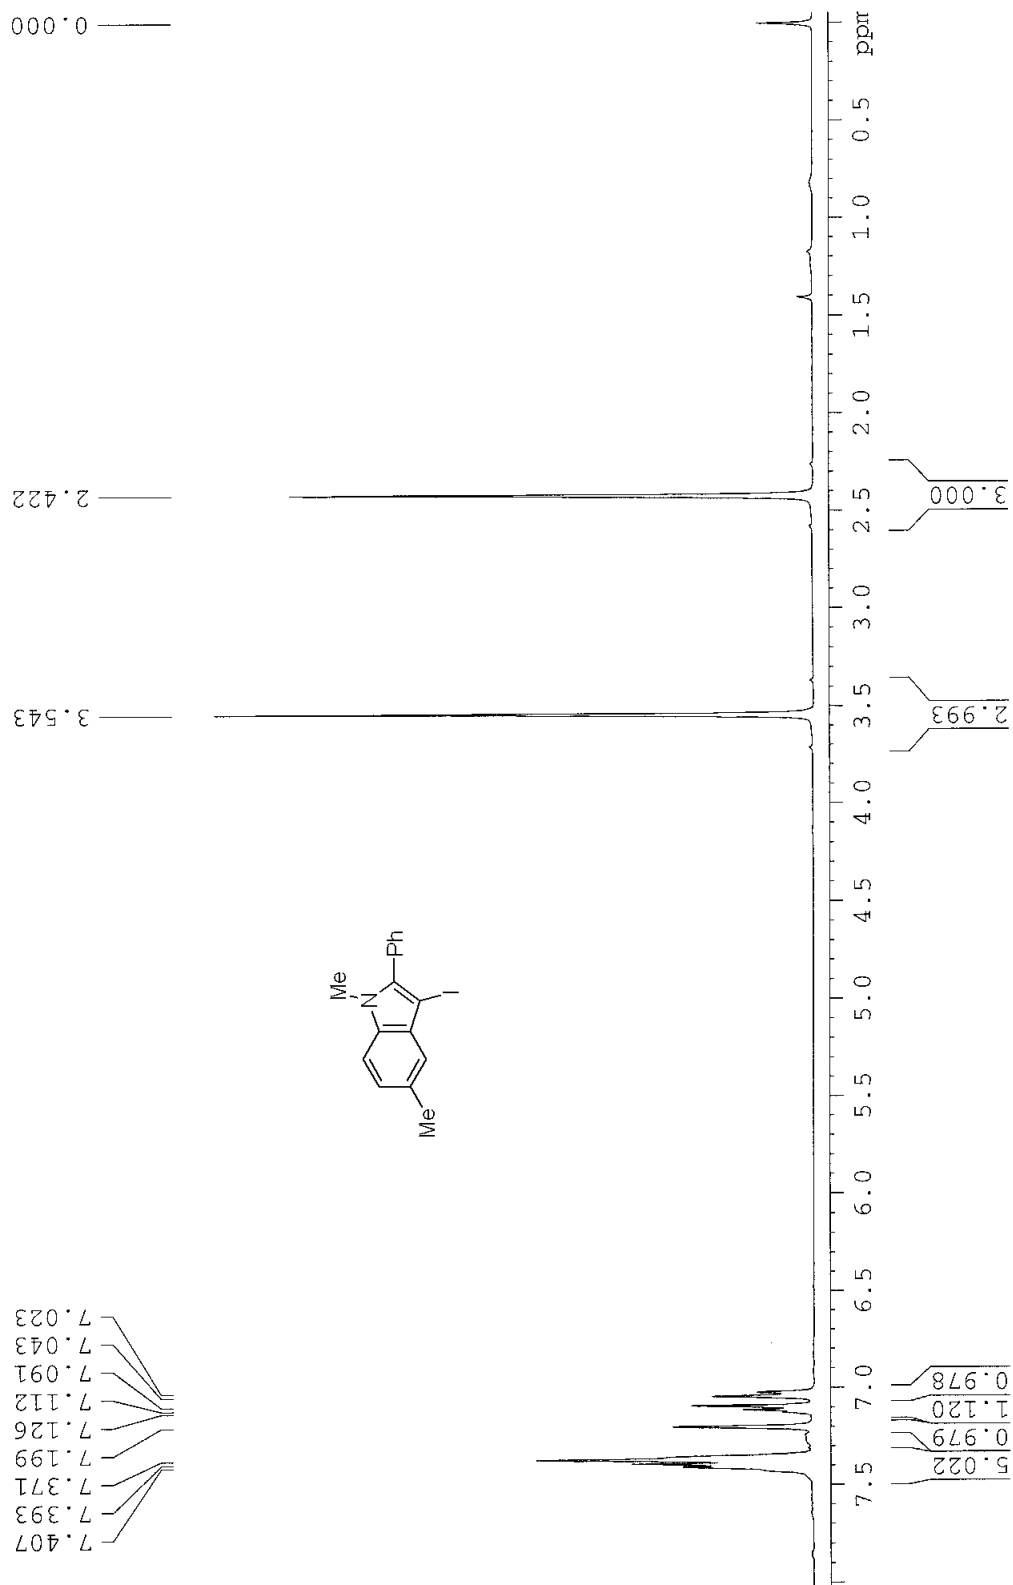

data/nmr400/dwy143

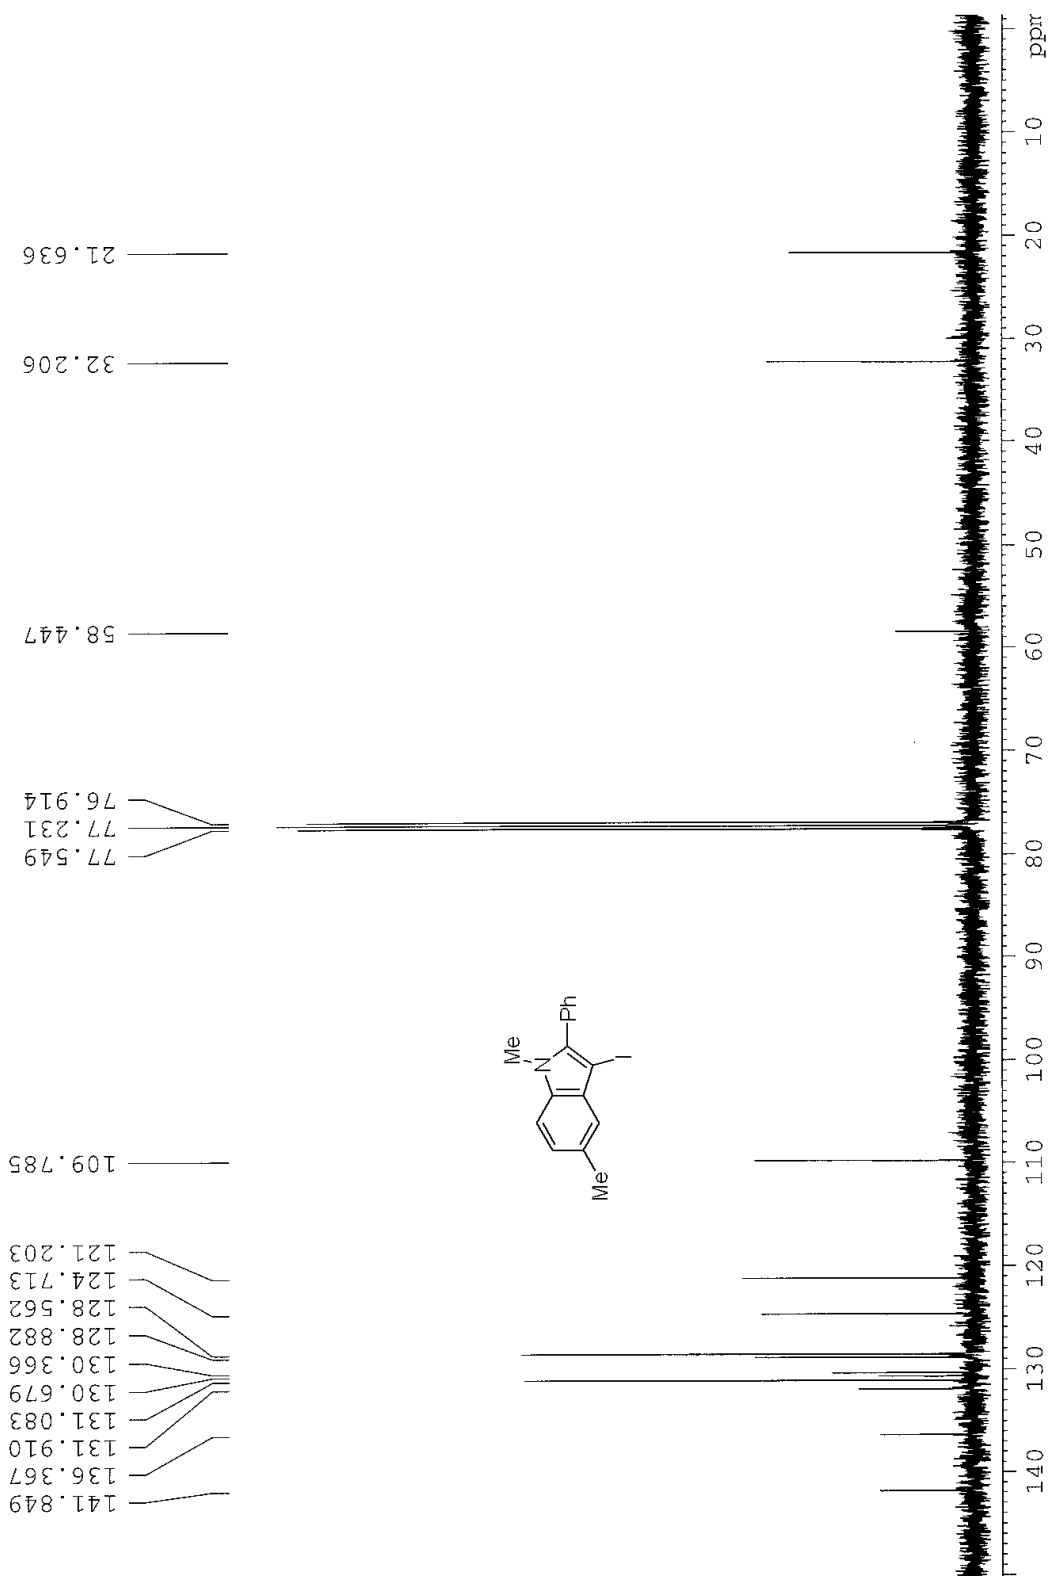

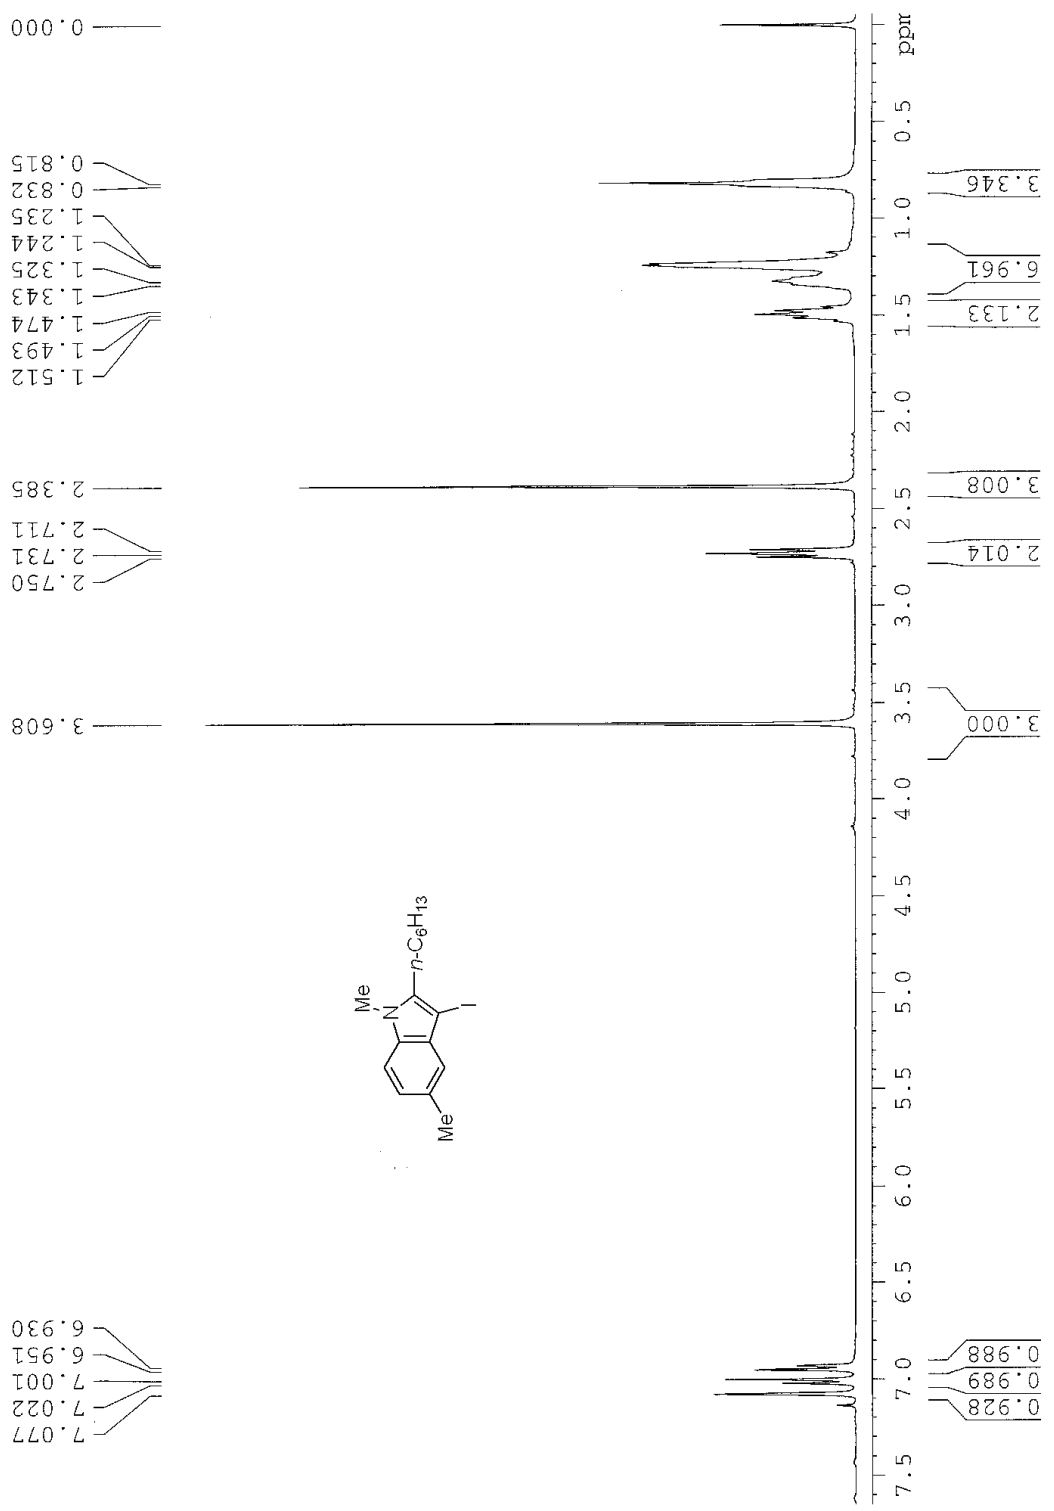

data/nmr400/dwy152

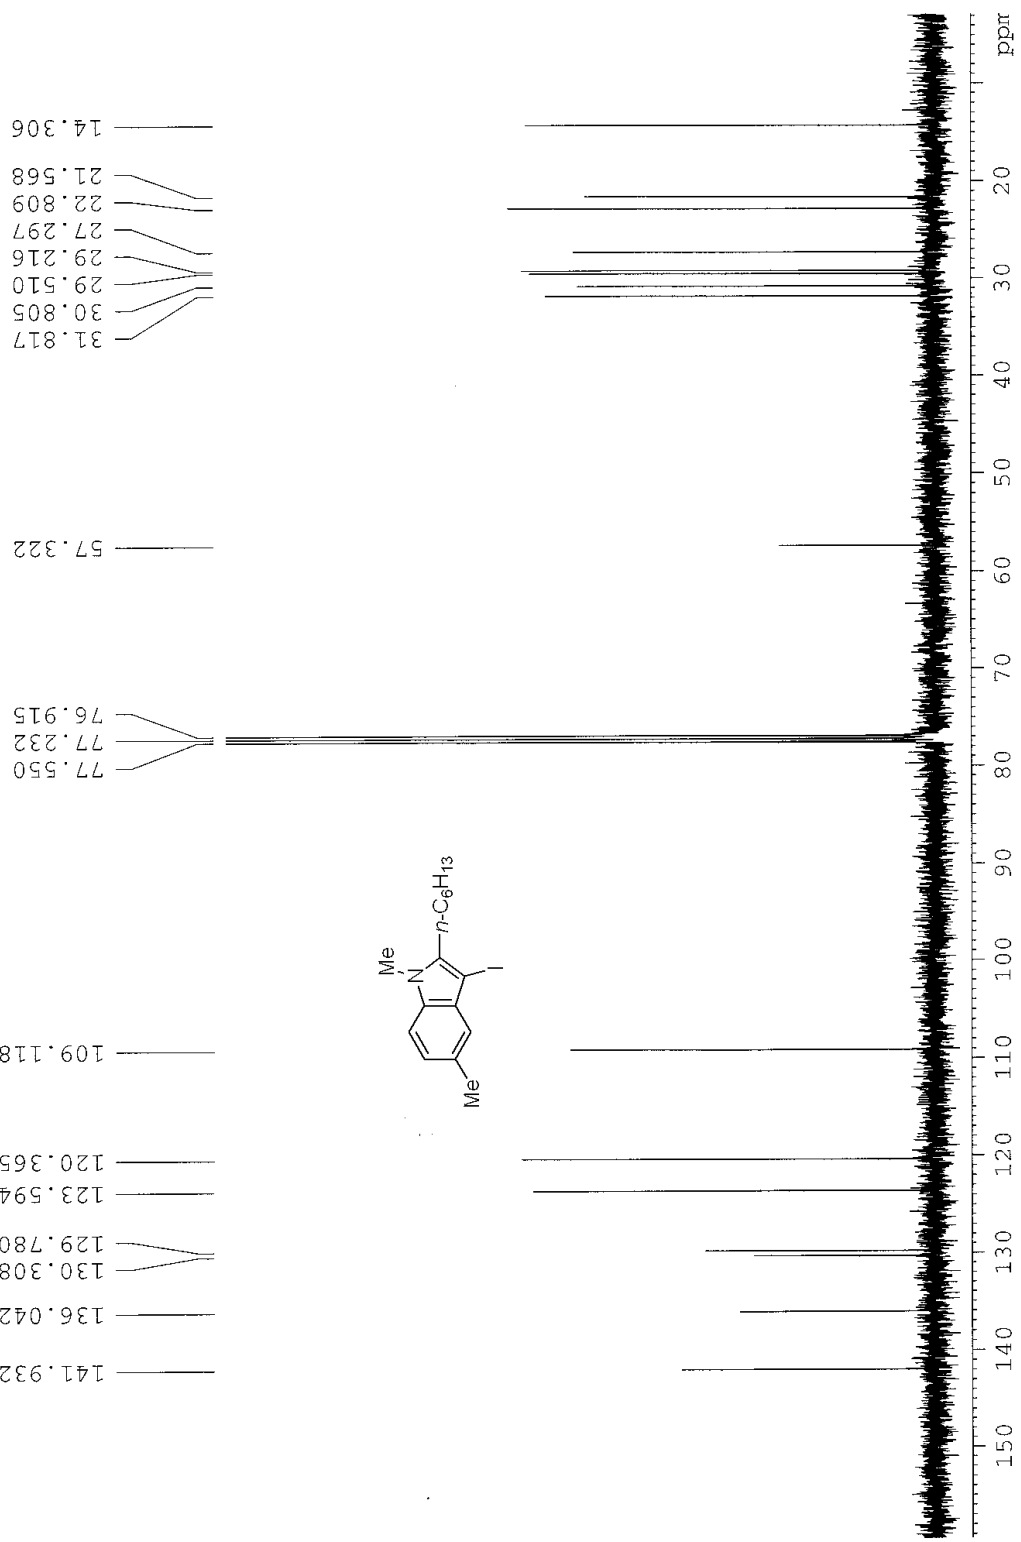

data/nmr400/dwy152c

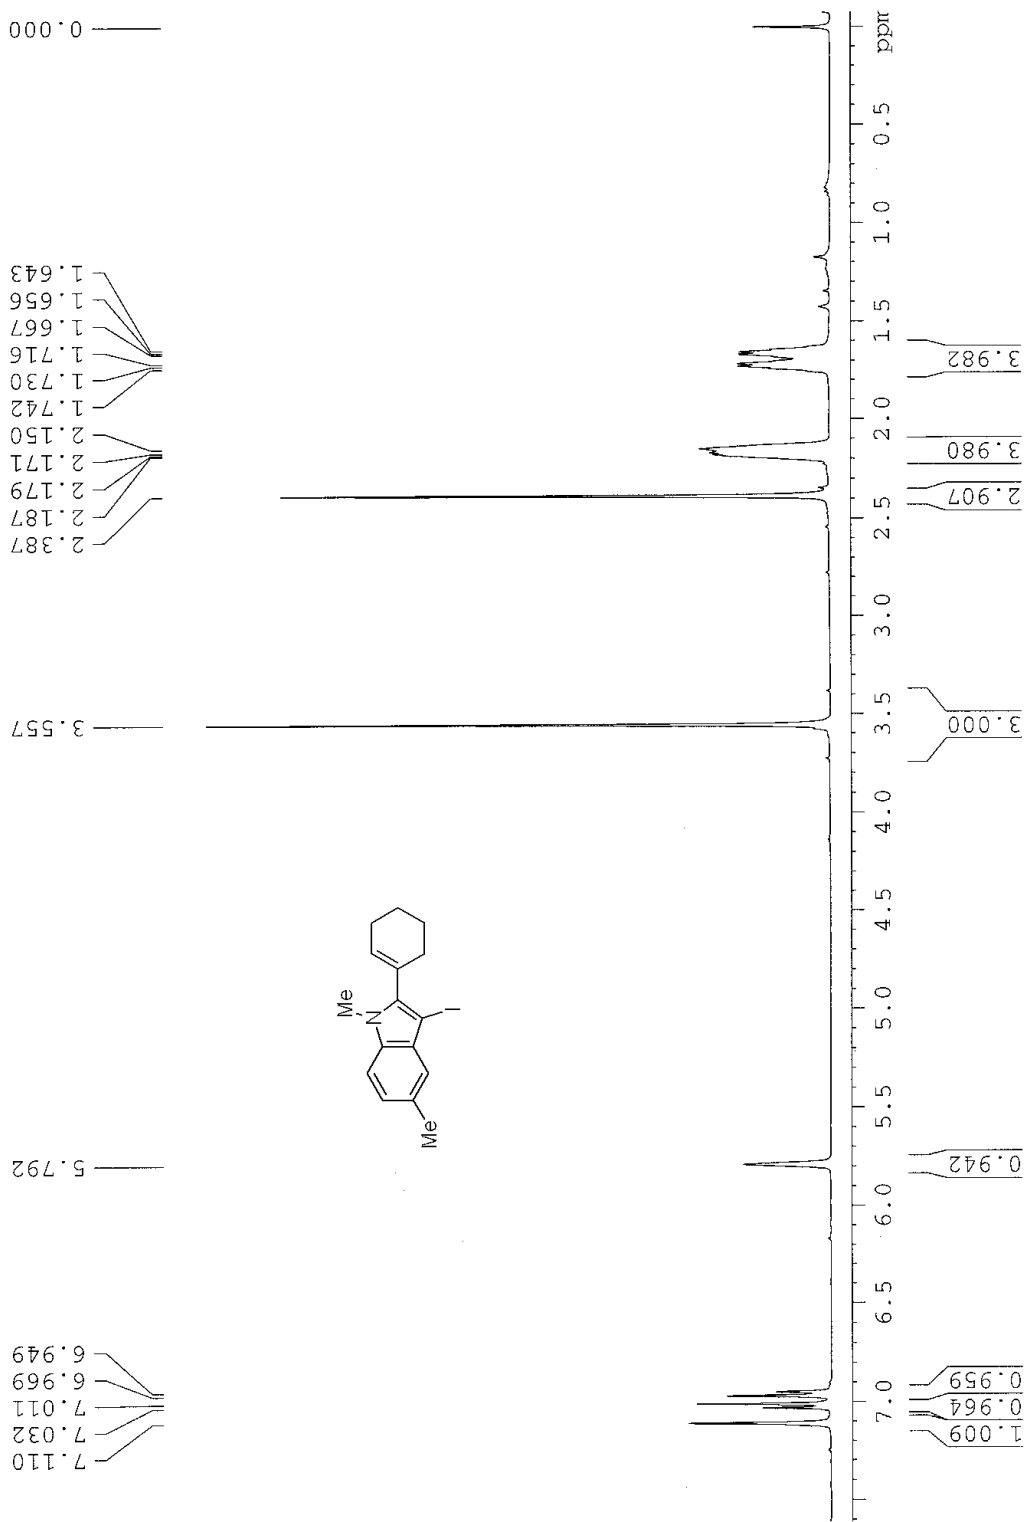

data/nmr400/dwy147



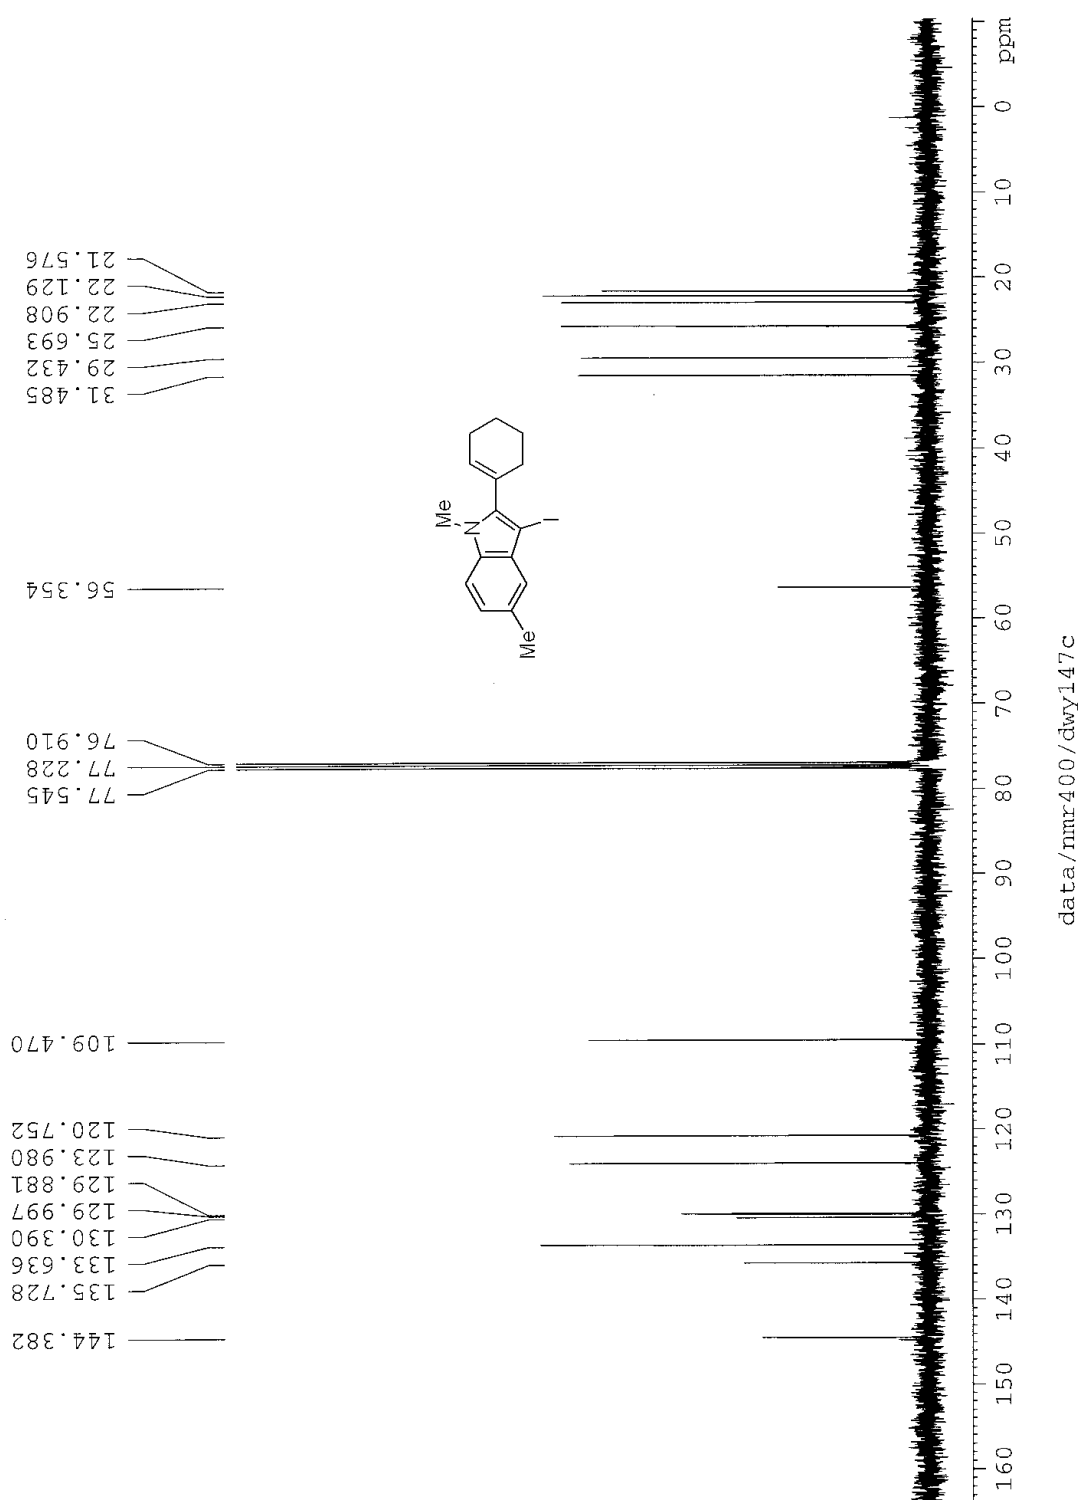

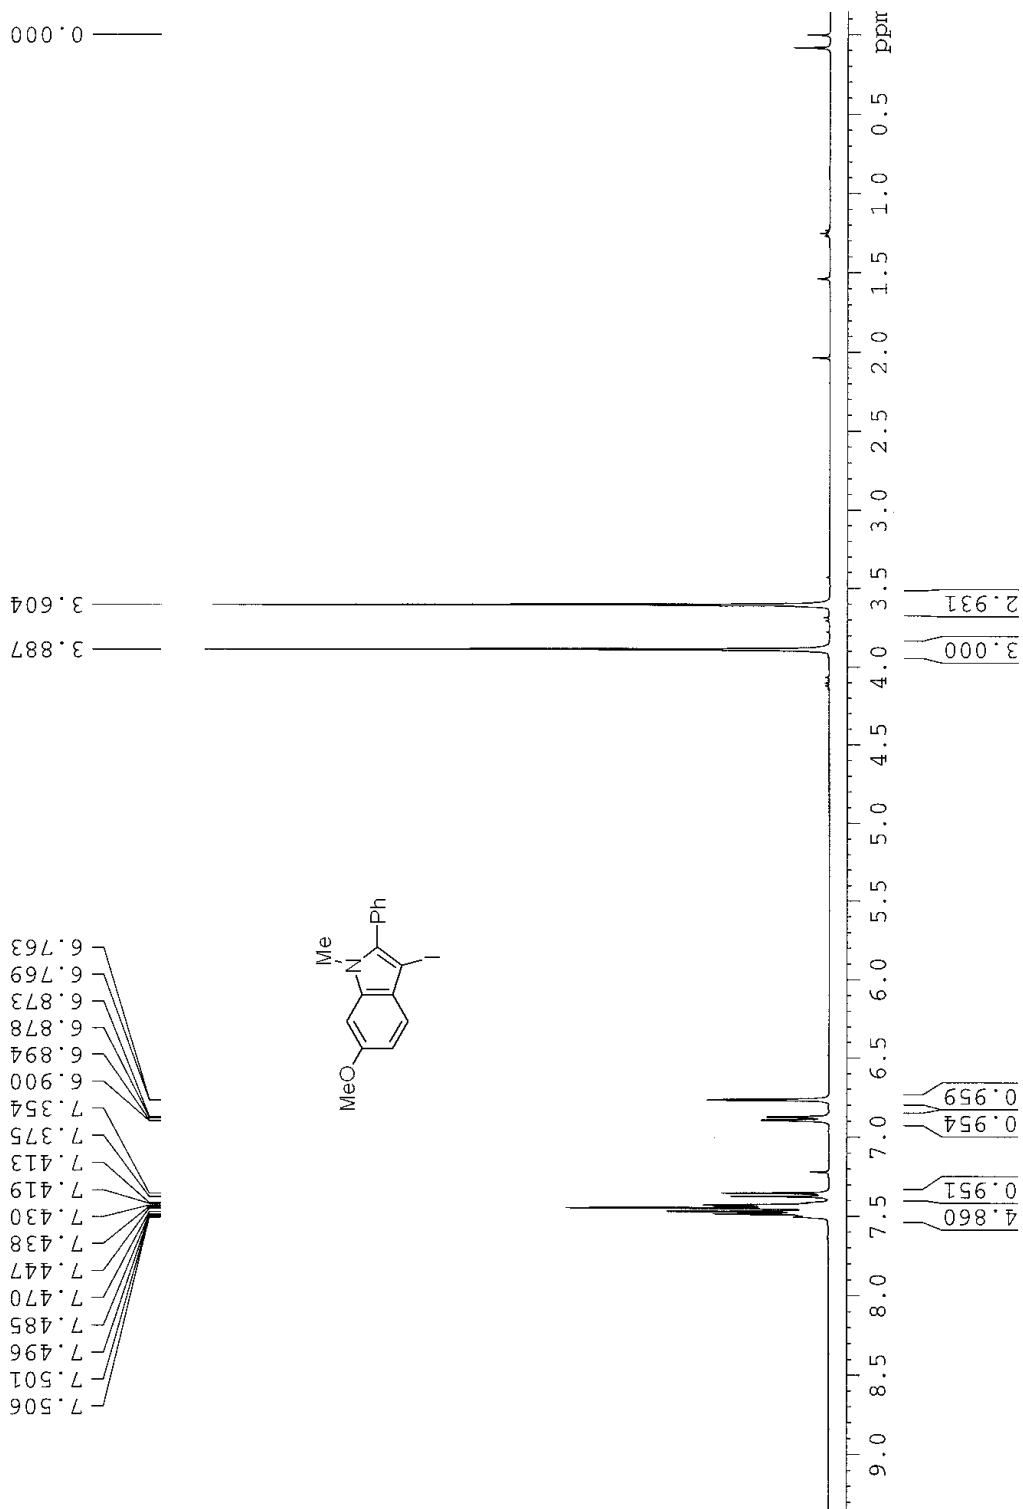

data/nmr400/dwy165

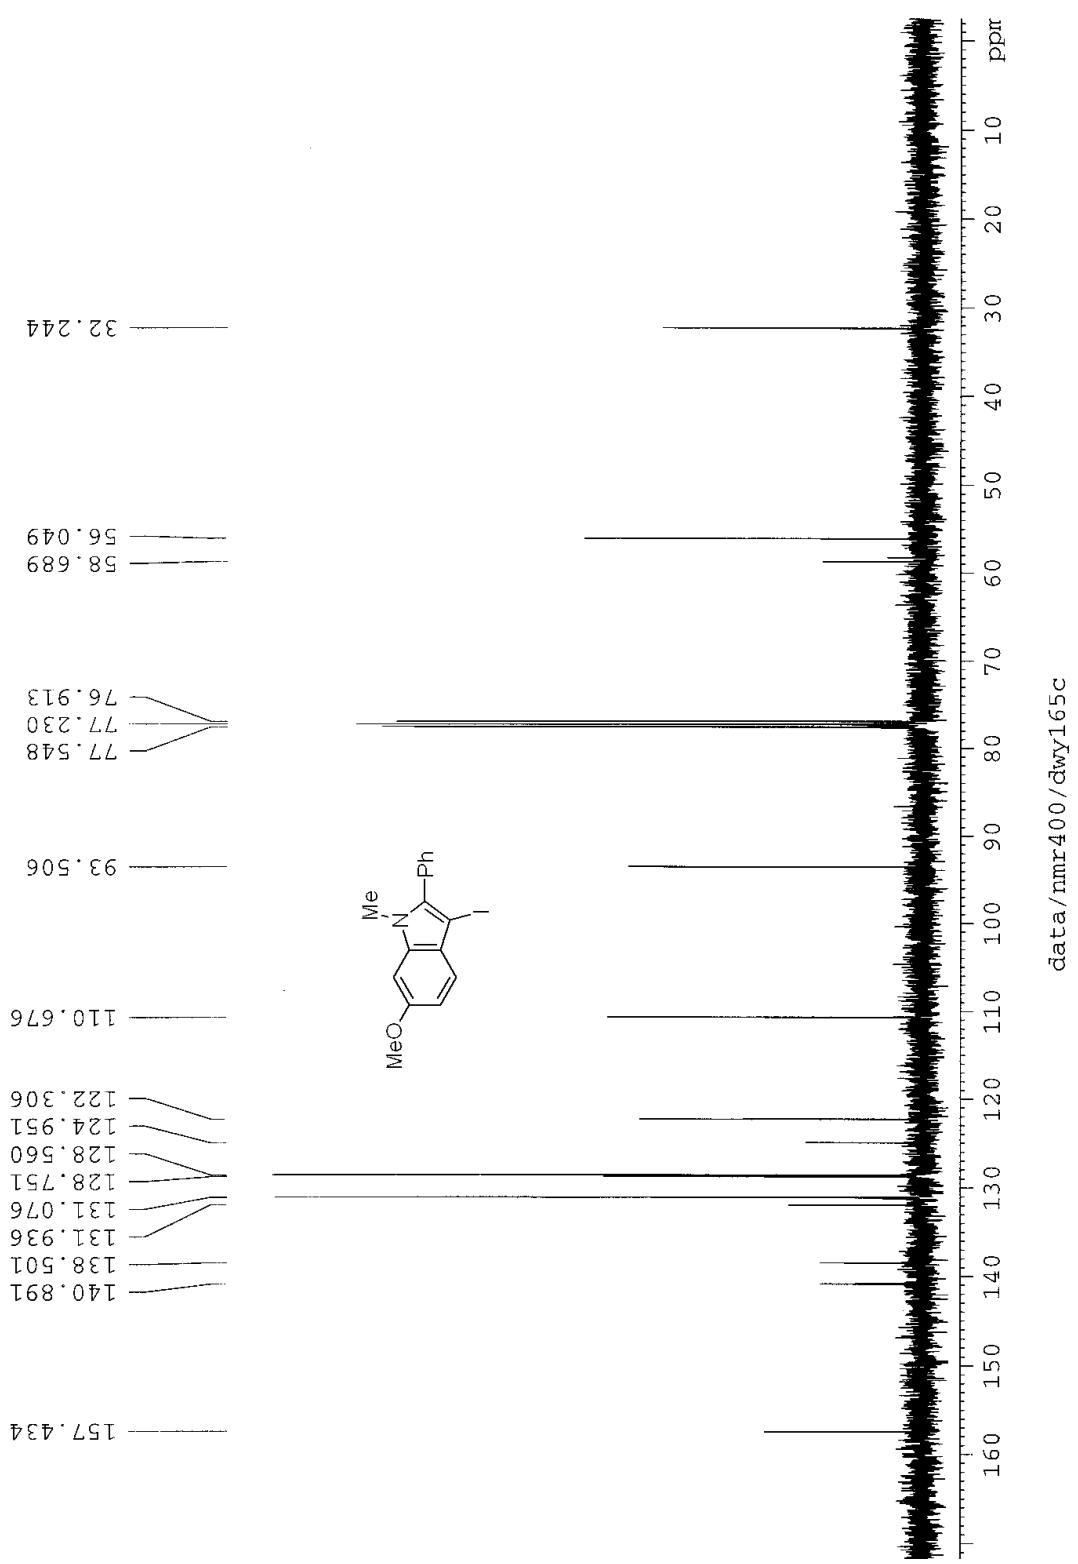

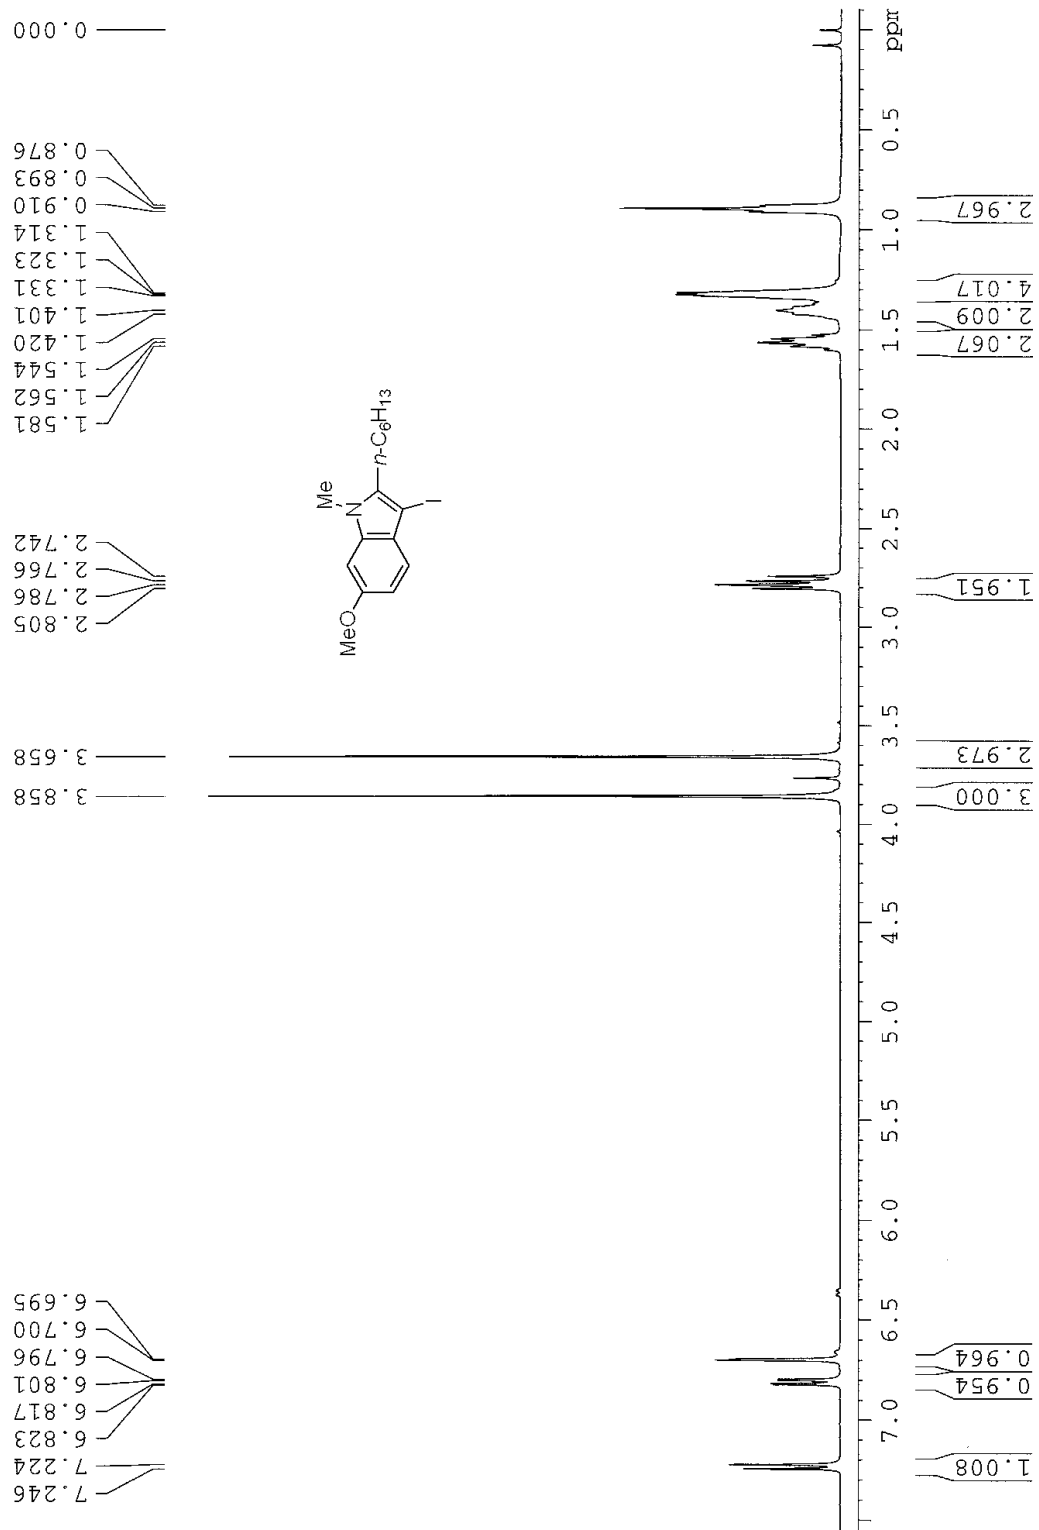

data/nmr400/dwy164

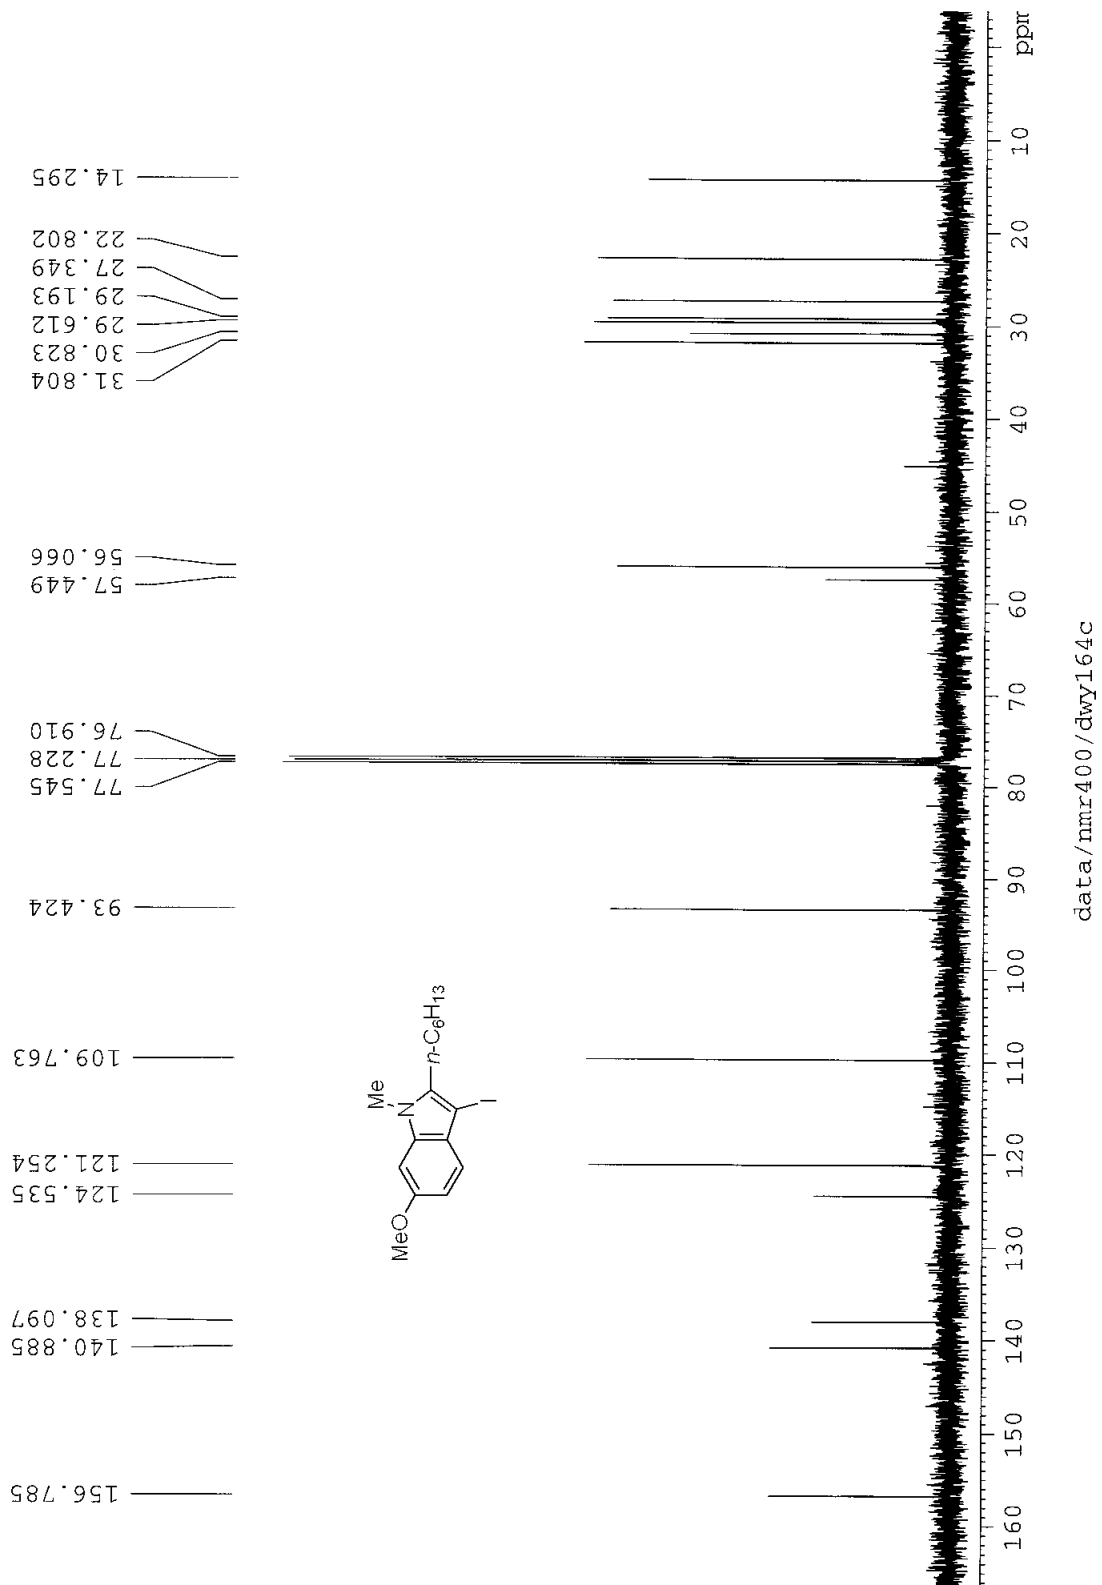

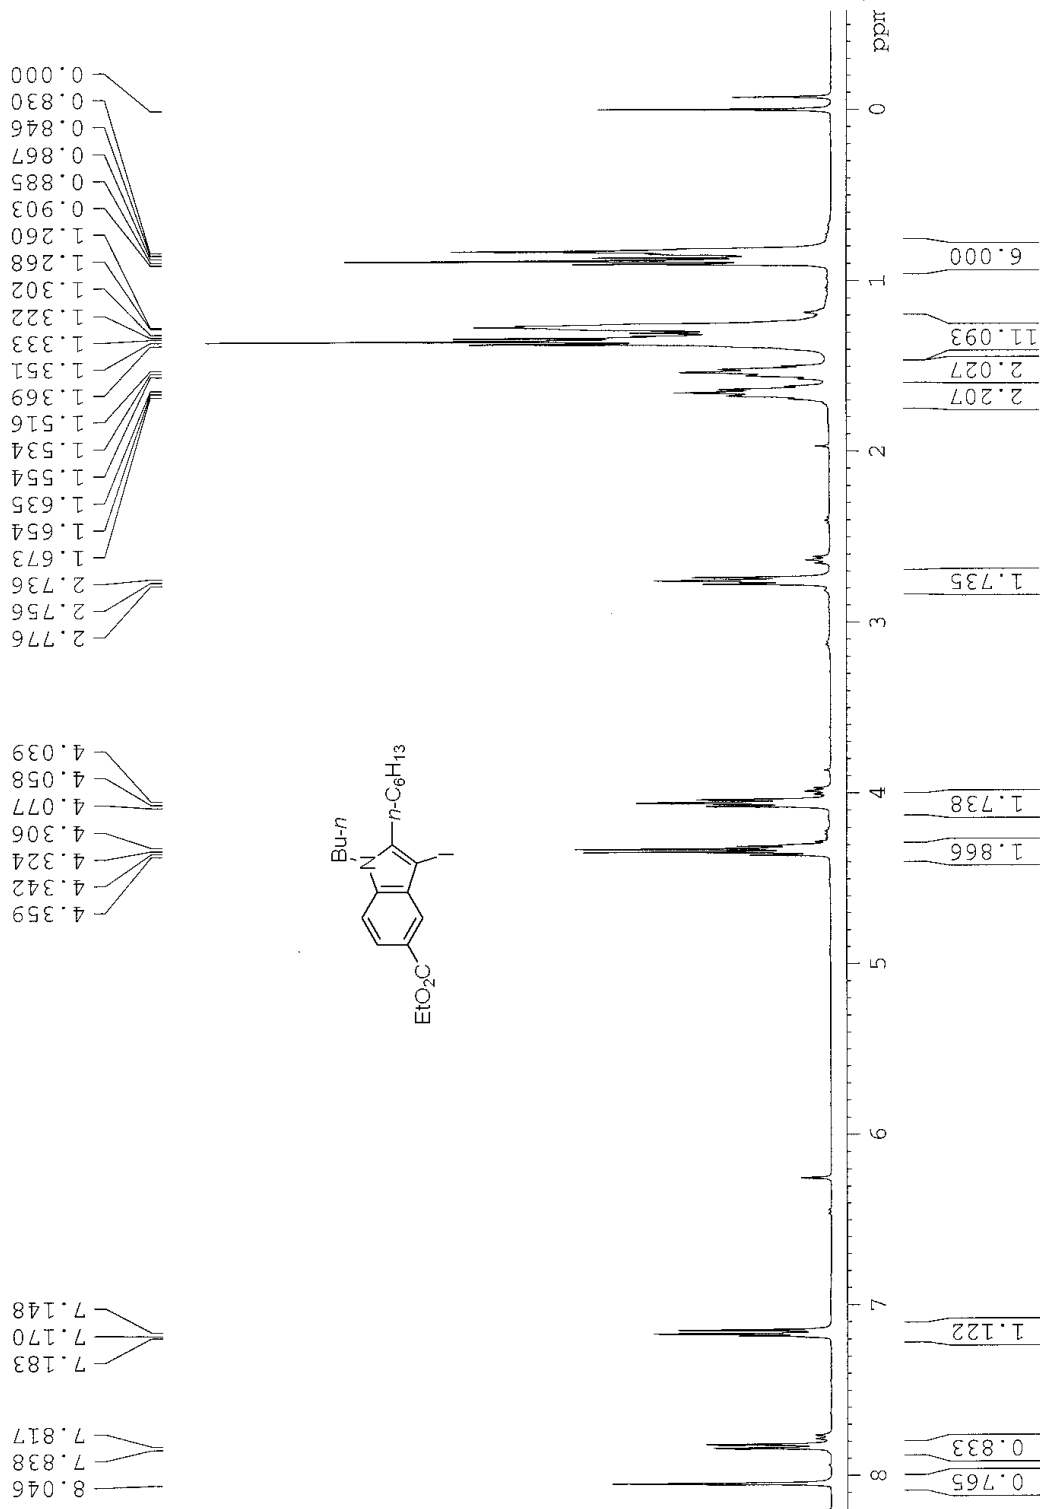

data/nmr400/dwy150

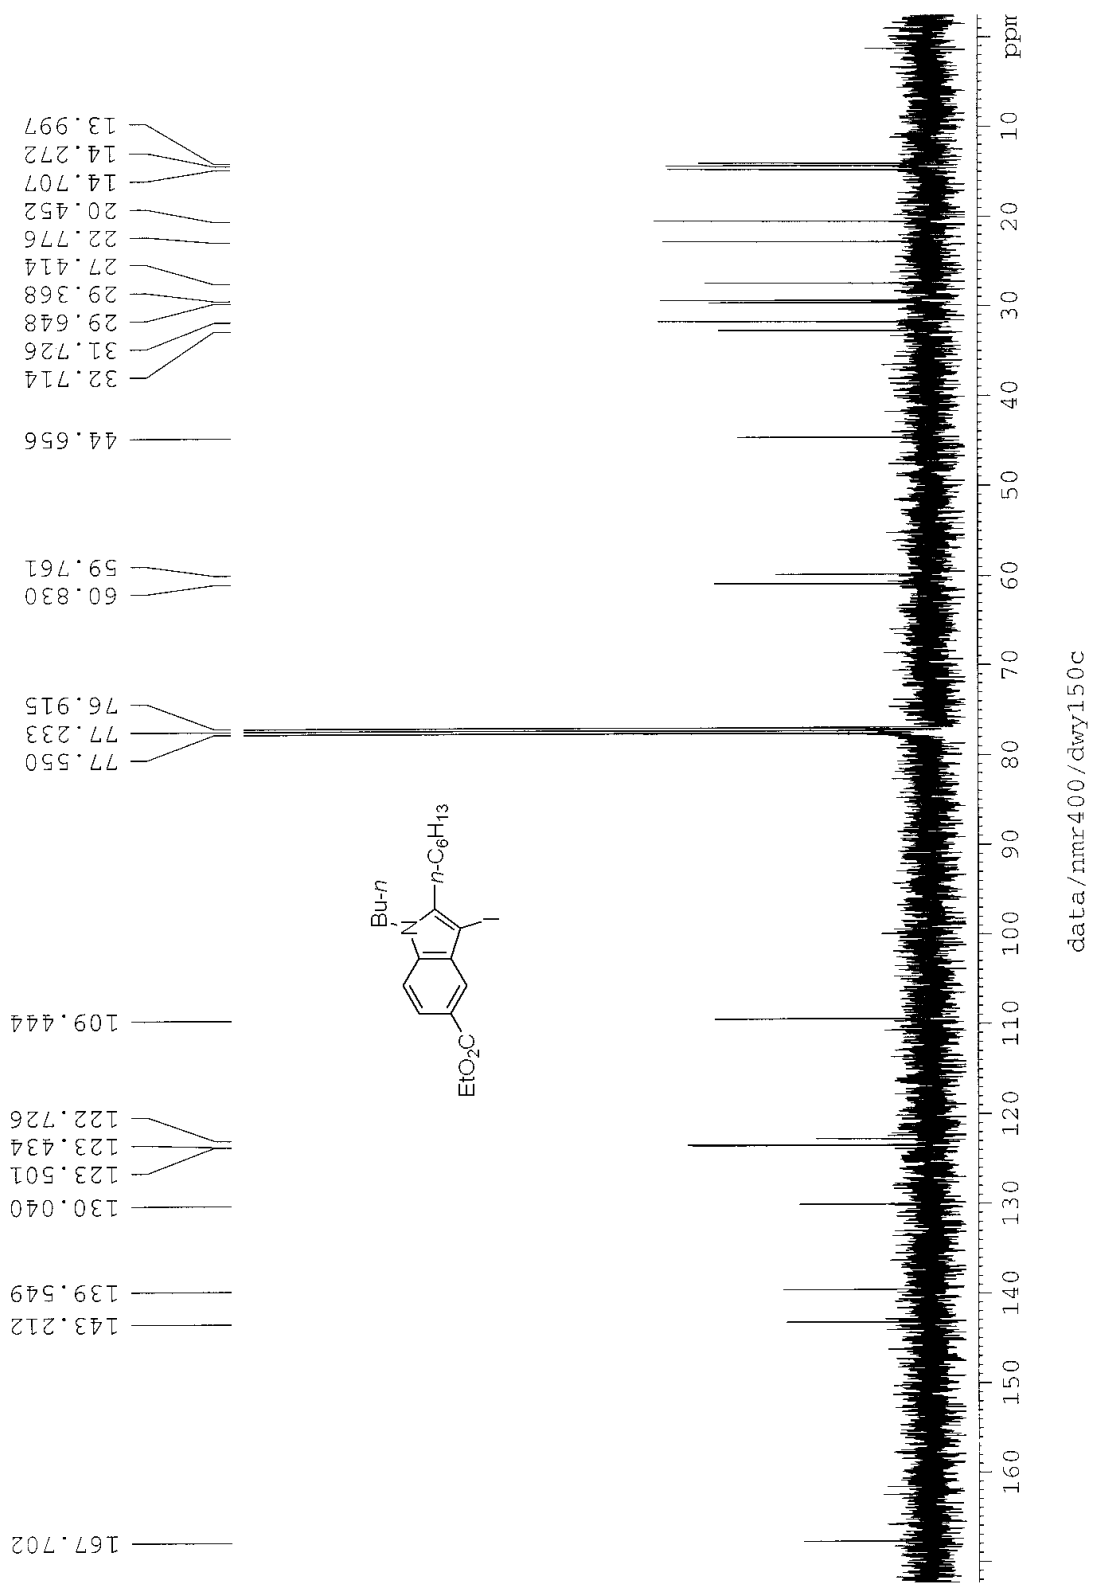

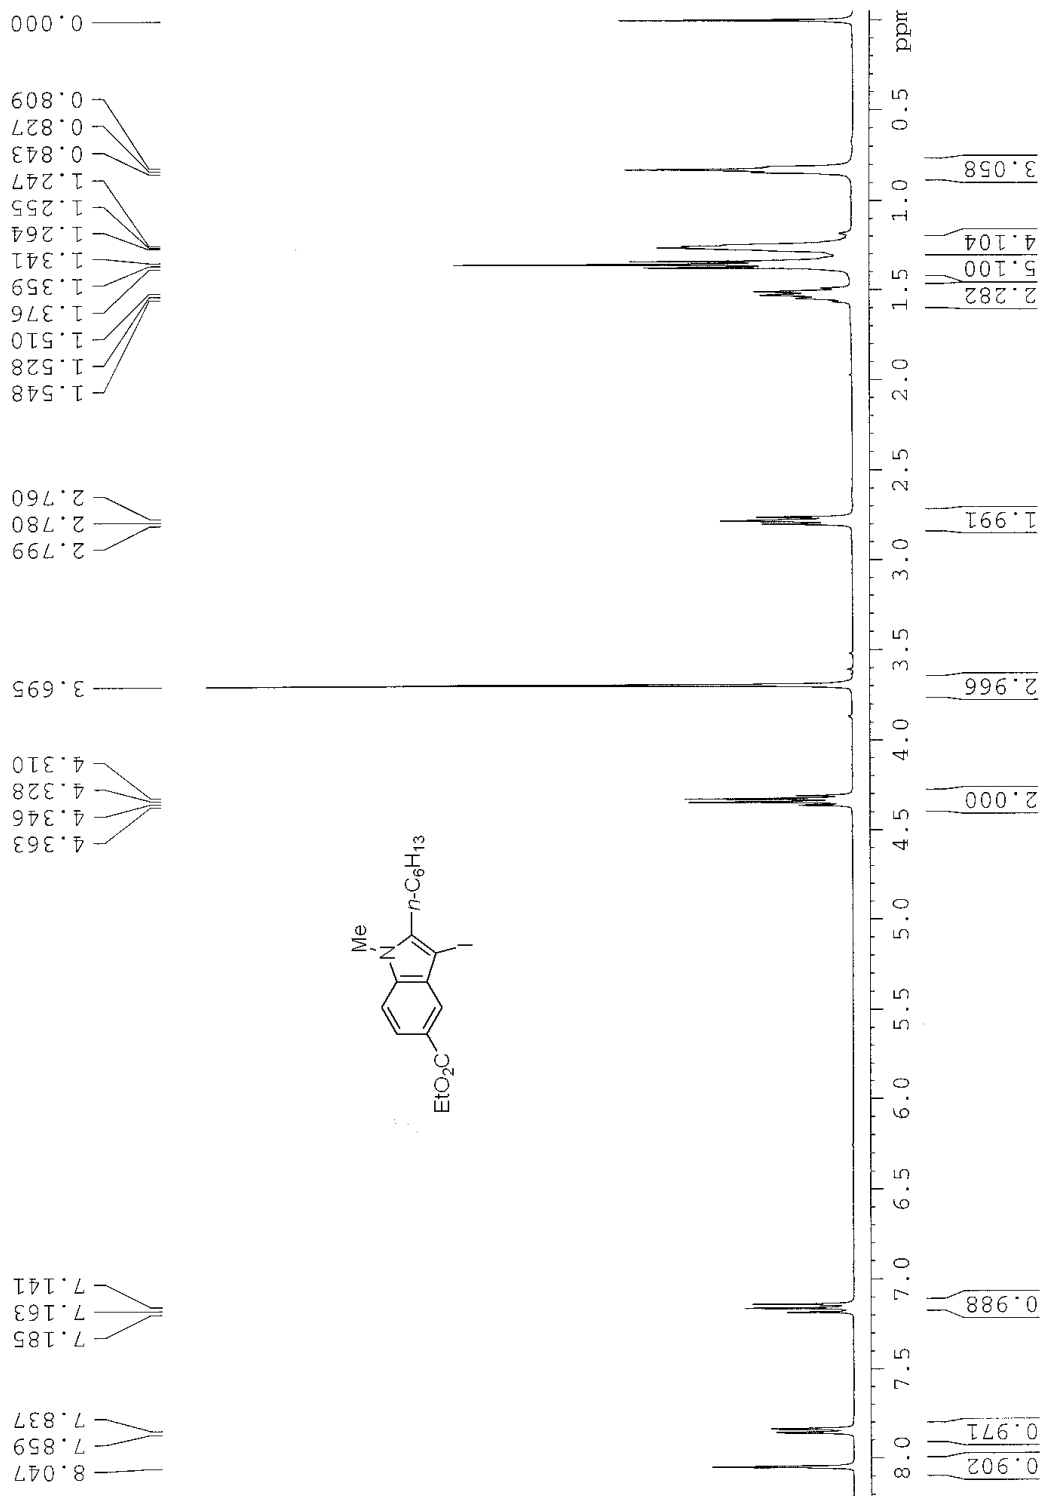

data/nmr400/dwy151



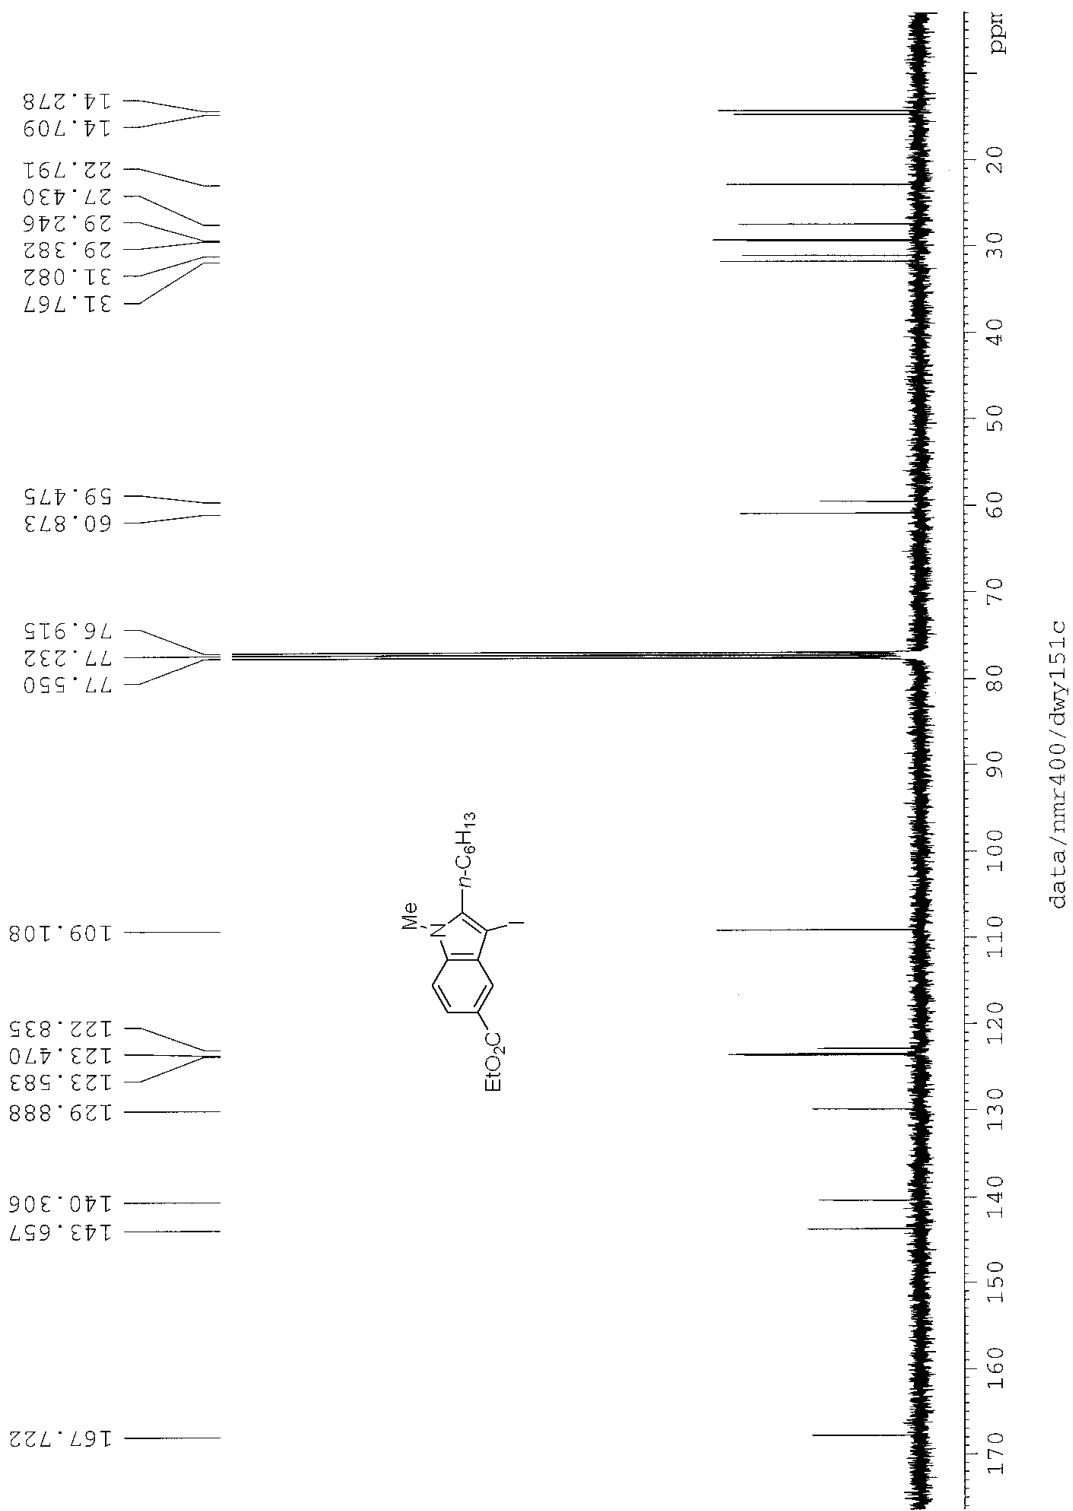

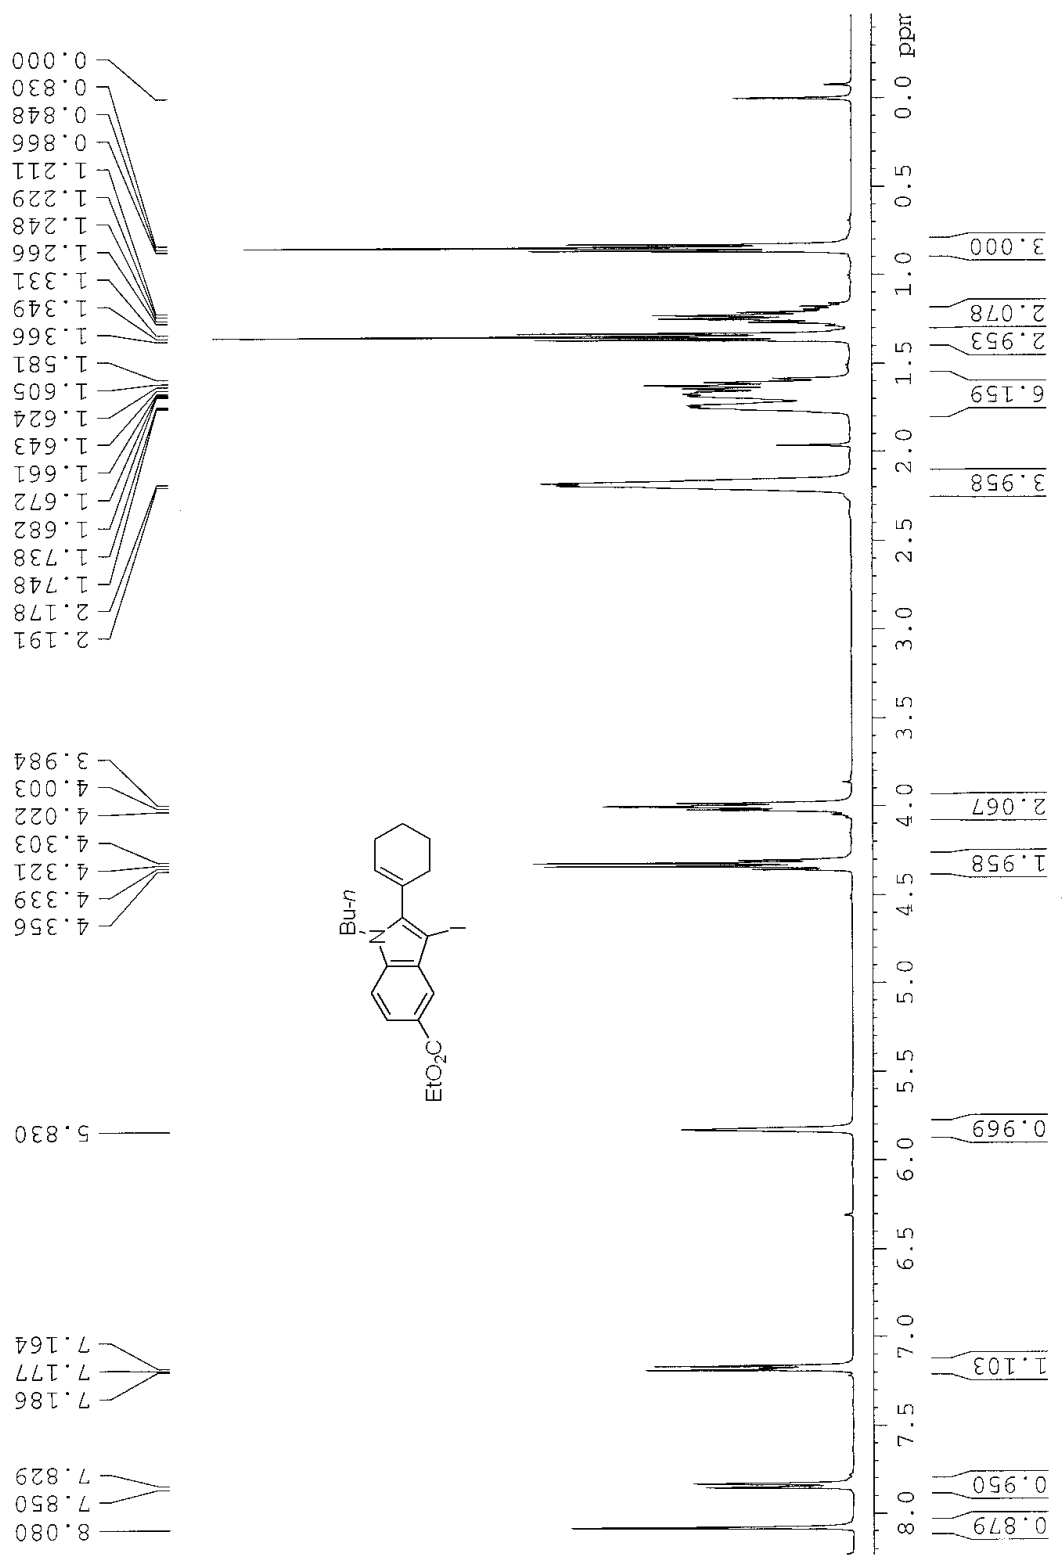

data/nmr400/dwy145

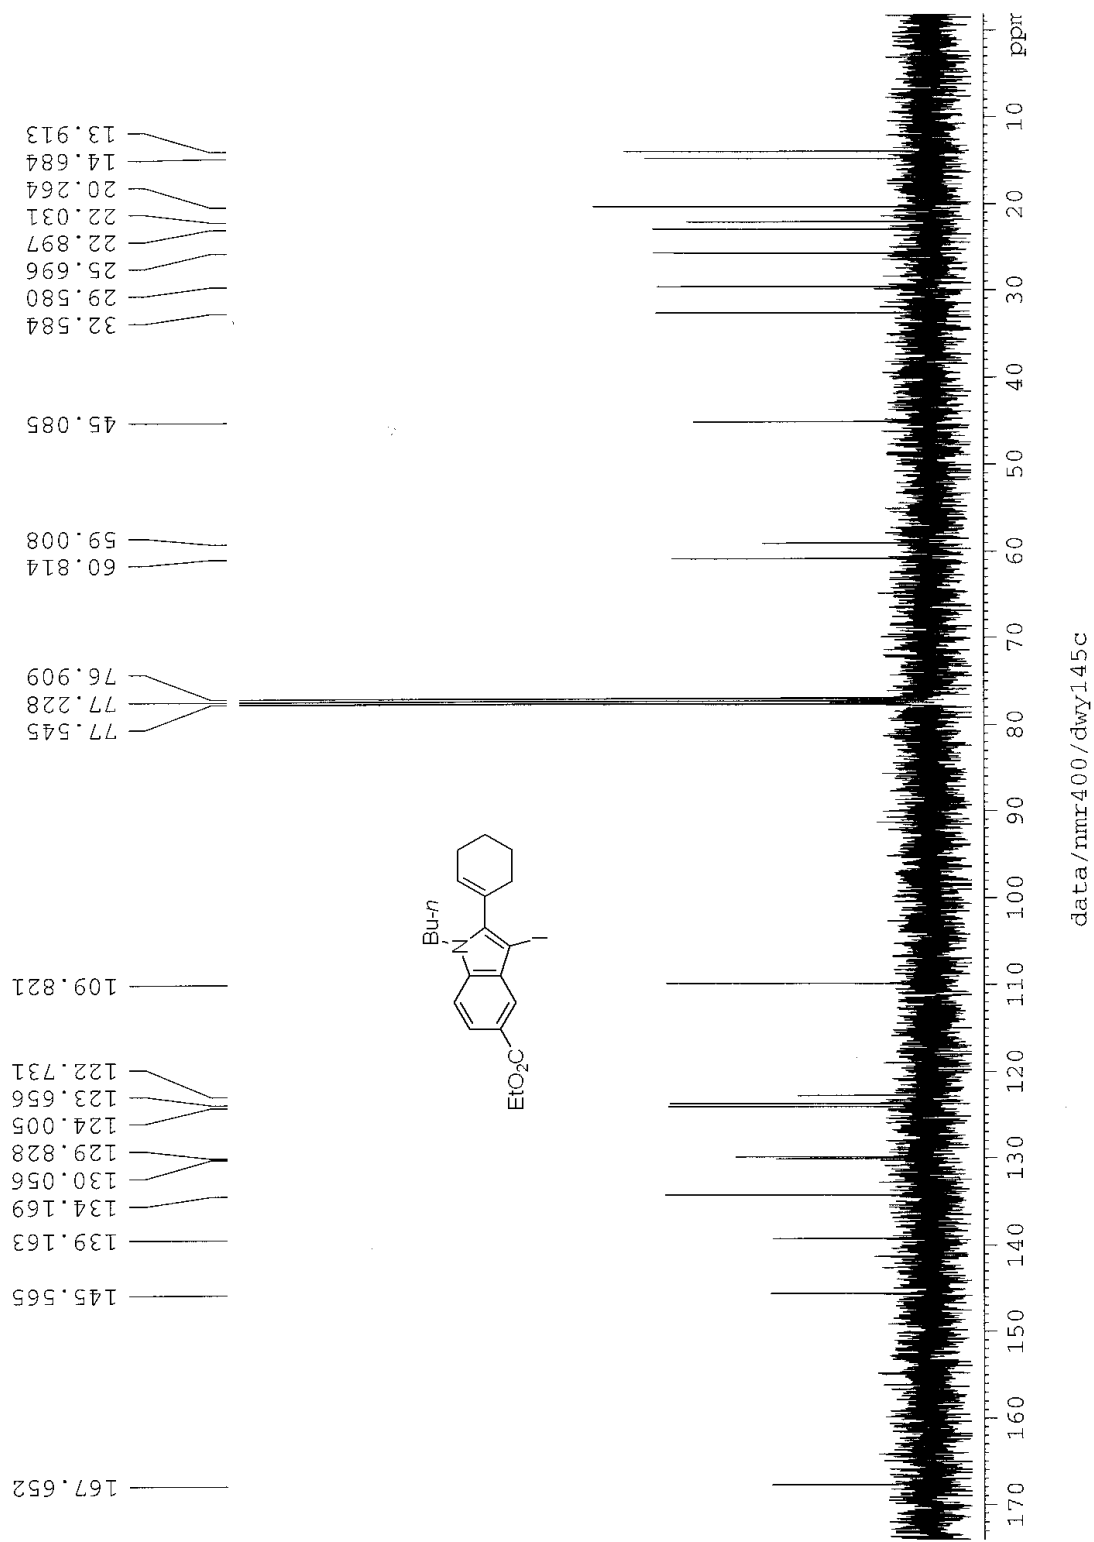

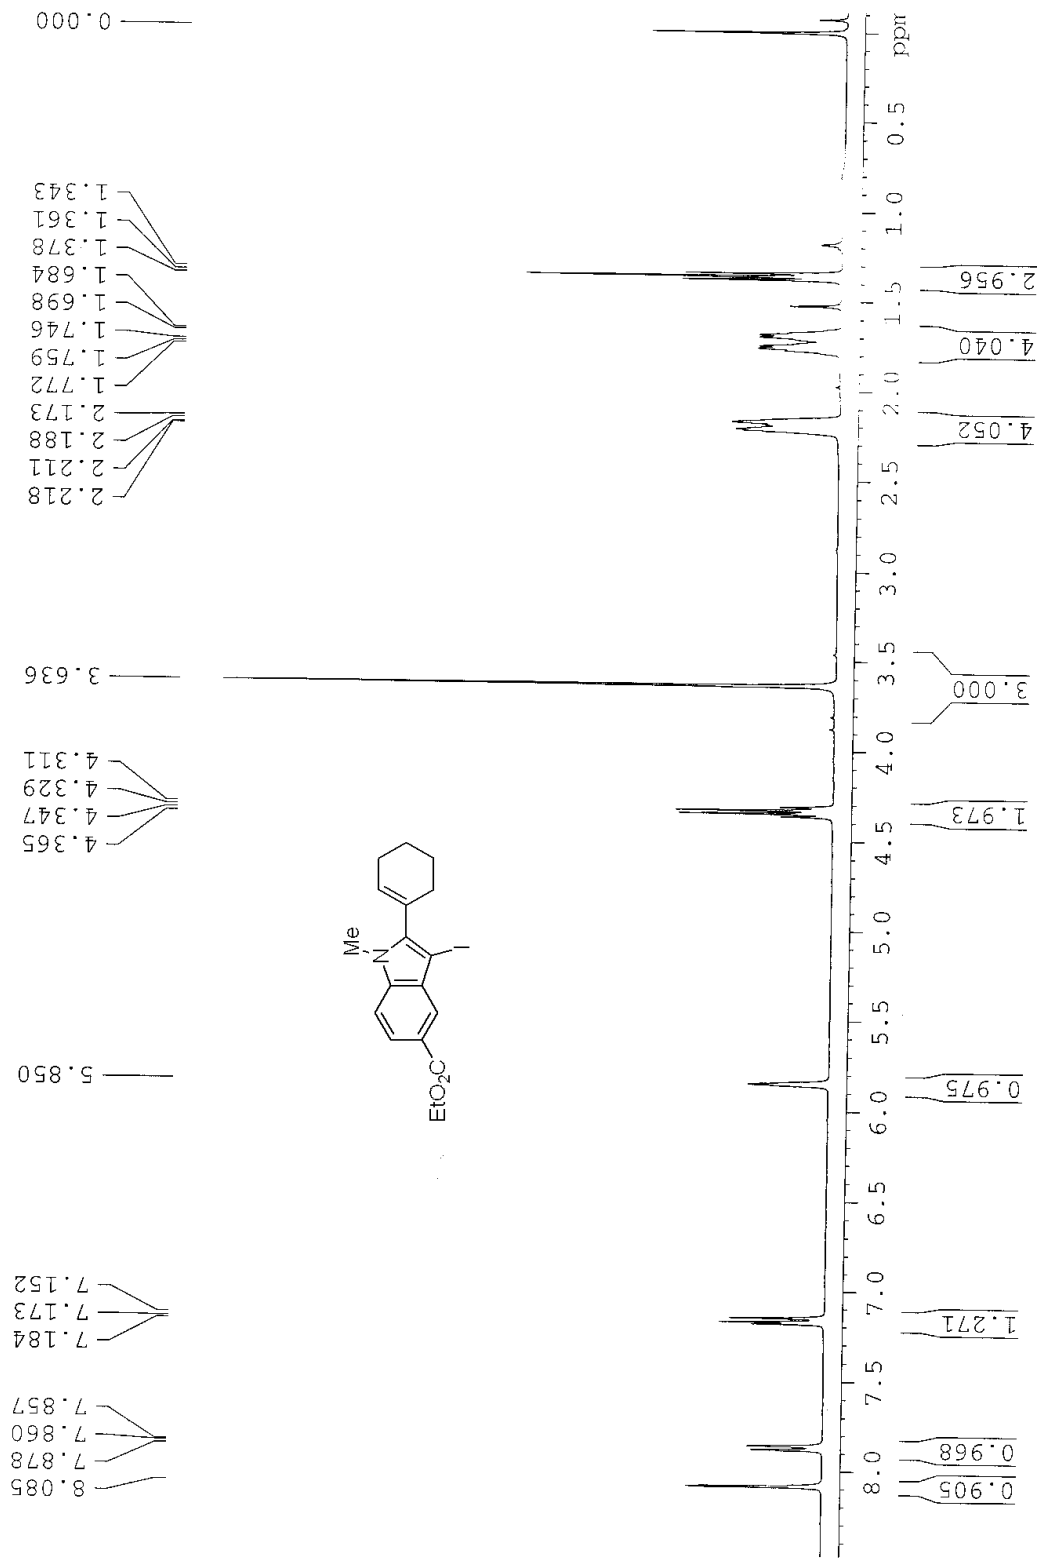

data/nmr400/dwy146

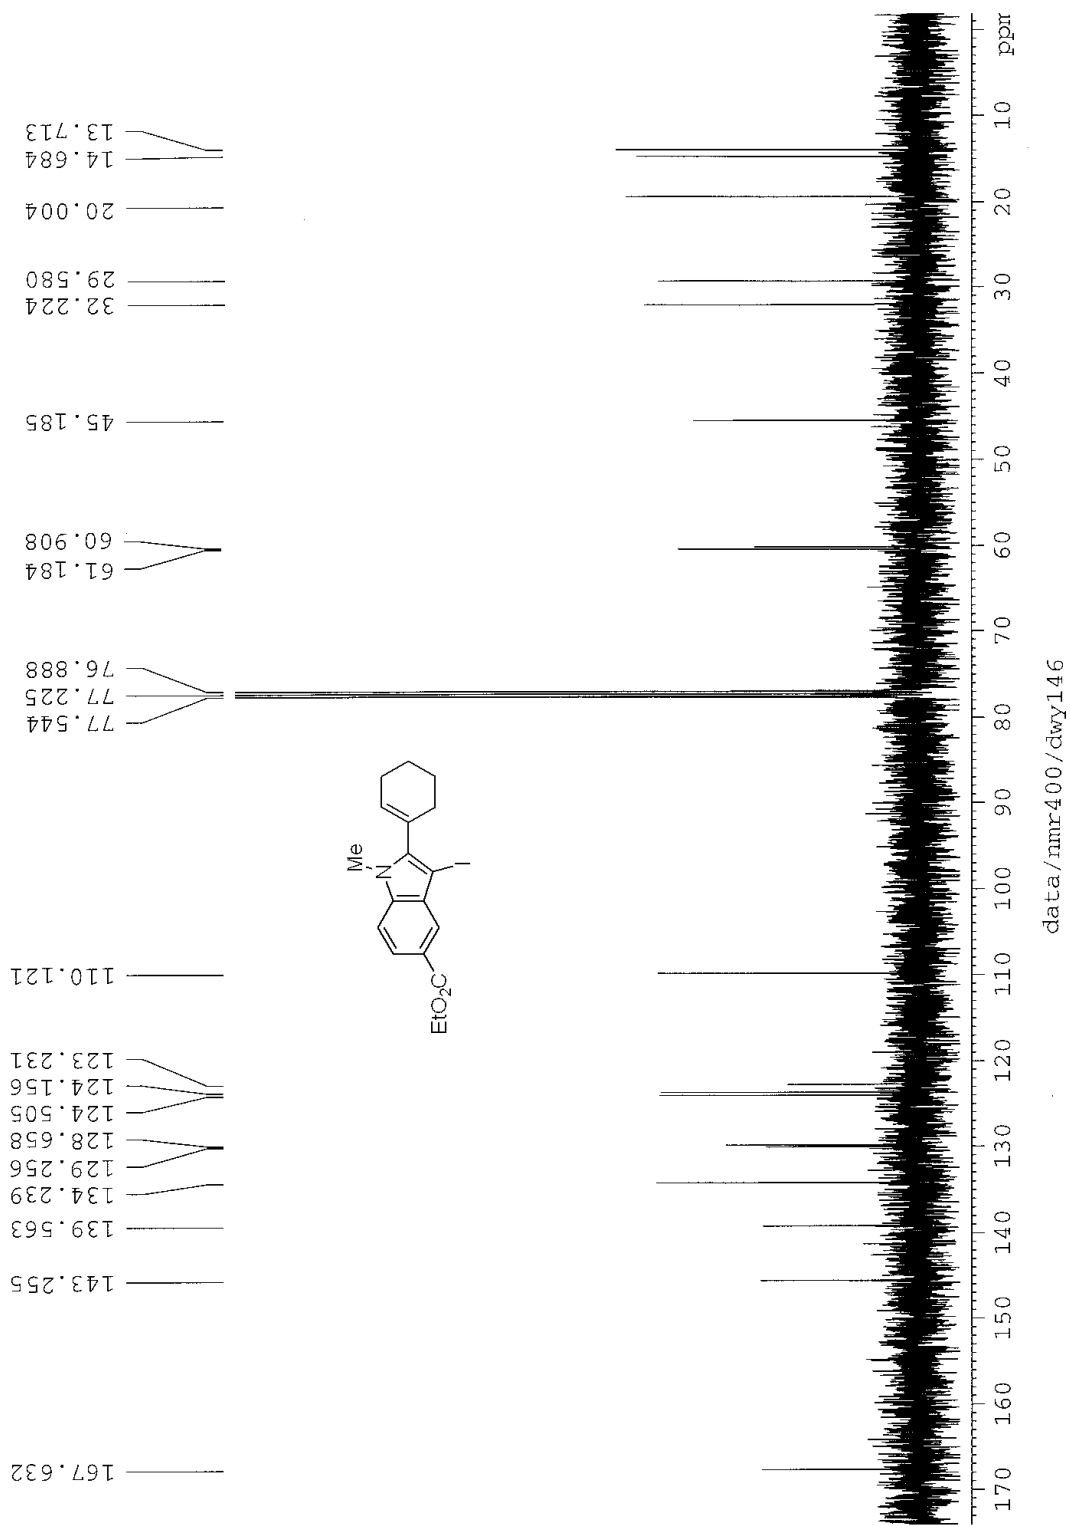

Supplement: NIHMS63115-supplement-1si20051102_10.pdf [file NIHMS63115-supplement-1si20051102_10.pdf]
